# Supplementary material for: Silver nanoparticle–protein interactions in intact rainbow trout gill cells
Source: Royal Society of Chemistry journal article supplement (doi:10.1039/c6en00119j), 2016-01-01
Supplement: c6en00119j1.zip [file c6en00119j1.zip]

## Sheet: Proteins in Extraction_Control
Protein name	Sample gi number	AA length	Molecular Weight	AA	AA length	Cys counting	Cys abundance
beta-2 microgloblin	1449072		13 kDa	MKSILSIVVLGLIYSAVEAKESPPKVQVYSRNPGNFGDKNTLICHVSGFHPPDISIQLLKNGVEIPDAKQTDLAFEQGWQFHLTKSVGFTPASGEEYTCRVRHLKNLKTYTWEADM	116	2	0.0172414
eukaryotic initiation factor 2 alpha subunit	12711655		36 kDa	MPNLSCRFYQHRFPEVEDVVMVNVRSIAEMGAYVSLLEYNNIEGMILLSELSRRRIRSINKLIRIGRNECVVVIRVDKEKGYIDLSKRRVSPEDAIKCEDKFTKSKTVYSILRHVAEVLEYTKDEQLESLFTRTAWVFDEKYKRPGYGAYDVFKQAVSDPAMLDGLDLTEEERAVLIDNINRRLTPQAVKIRADIEVACYGYEGIDAVKDALRAGLSCSTEAMPIKINLIAPPRYVMTTTTLERTEGLSVLNQAMAAIKERIEEKRGVFNIQMEAKVVTDTDETELARQLERLERENAEVDGDDEDGEMEAKAED	315	5	0.015873
14-3-3C2 protein	34452067		28 kDa	MDKTDLIQKAKLAEQAERYDDMAASMKEVTEQGGELSNEERNLLSVAYKNVVGARRSAWRVISSIGQKTEGSDKKLAMVNEYREKVEGELRDICNDVLELLNKYLIENSTNAESKVFYLKMKGDYYRYLAEVASGDDKTATIENSQEAYQQAFDISKKEMDPTHPIRLGLGPHFSVFFYEILNSPEKACSLAKQAFDDAIAELDKLNEESYKDSTLIMQLLRDNLTLWTSDNAPEEGEGGEAGEGRRENEN	251	2	0.00796813
chaperonin containing TCP1 subunit 8	60223025		59 kDa	MAMHVPKAPGFAQMLKDGAKHYSGLEEAVFRNIQACKELAQTTRTAYGPNGMNKMVINHLEKLFVTNDAATILRELEVQHPAAKMVVMASHMQEQEVGDGTNFVLVFAGALLELAEELLRMGLSVSEVIEGYELAMKKSLELLPECVCASAKNLHDVEEATAMIRPAVMSKQYGNEDFLANLIAQACVSIFPESGNFSVDNVRVCKILGCGLTSSSVLHGMVFKKETEGDVTSIKDAKIAVFSCPFDCMVTETKGTVLINNAEELLNFSKGEEDMMEAQVKSIAEAGANVVVTGGKVADMALHYANKYQLMVVRLNSKWDLRRLCKTVGAVALPRLTPPTPEEMGHCDSVYLDEVGDTQVVVFKHEKEDGAISTLVIRGSTDNRMDDIERAIDDGVNTF…	546	11	0.0201465
multidrug resistance associated protein 2	159793582		177 kDa	MTTEALEKYCGSIFWNSSFLQREDPDLPVCLEQTVLVWAPLGFLWLCAPWHIAVLCRKATPTKHLSKLYLCKQIVVGLLFLTAIAGLAVTLGEDYGPTRDTTATEKNPWVFYANPILFAVSWILLVLSQEGVRRREGAVDSTTLFLFWLILVVCDVFPFQTLLREALRMGEIPDLPRFCLFYISFGLELIALILSAFADVPREAEDLVKKNPEVGAAFLSRITFNWFNSMVLNGFKRPLVQKDLWELSEAESTLQISQRFLQTMQTELKAARTRLQTKMRKRGEEKASKGQGEGLQNGHQNRLGKGVSQDVLMMEEKGDEKEKKEEKKKKKKEEKEYYPKSWLIPTIATTFKGVLWESAIFKLITDLLSFASPQILKLMISFTMDKSIHTWTGYMYAVL…	1579	19	0.0120329
succinate-CoA ligase GDP-forming alpha subunit	223049433		34 kDa	MSHSRLFARLLLQQNGVRSCYTASRKNLYIDKDTKVICQGFTGKQGTFHSQQAIDYGSRLVGGVSPGKGGRTHLGVPVFNSVKEAREGTGAEATVIYVPPPFAGAAIIEAIDAGMPLVVCITEGIPQQDMVKVKHKLLRQSTTRLIGPNCPGVINPGECKIGIMPGHIHKKGRIGIVSRSGTLTYEAVHQTTQVGLGQSLCIGIGGDPFNGTNFIDCLEVFLQDPKTDGIILIGEIGGNAEENAADYLKQHNSGANAKPVVSFIAGLTAPPGRRMGHAGAIIAGGKGGAKEKIAALQQAGVVVSMSPAQLGSTMFKEFEKRKML	324	7	0.0216049
HIG1 domain family member 1A	225703182		10 kDa	MSSNQDMPTYDENESKFMRKAKESPFVPIGMAGCAAVVAFGLWRLKSRGDTKMSVHLIHMRVGAQGFIVGAMTLGVIYSMYKQYLAPTDPGKDSK	95	1	0.0105263
NADH dehydrogenase 1 beta subcomplex subunit 10	225703208		20 kDa	MPSDYDKDAYPEPPRQTPIVDKQTTLPNPALILTKLFYYSVDLPVTTFRELVESIHSGNKYNYYHQKFRRVPELTECTEGDYTCYYEAEMQWRRDHKVDQEIVKVVQERLRACQQREGTSYHQNCSKELQQFADVAKAYQSRYGDLGAYASSRKCLMKQKDRMMAAEAKA	170	5	0.0294118
ATP synthase O subunit, mitochondrial precursor	225703264		22 kDa	MAALGLGLQVRQFSTSVLRQALIRPPIDVYGVGGRYATALFSAASKQKKLEQVEKEMRTLSALIKDPKLSSIVMNPHVKRSLKLKFFGDAMTKANLSPISVNLITVLADNGRLTLTADVVGAFAKMMSAHRGEVICTVTTAHPLDEANLAELKVALNGFLAKGETLILETKSDASILGGMIVSIGDKYVDMSTKTKIHKLTKIIRDS	207	1	0.00483092
Myosin light polypeptide 6	225703418		17 kDa	MSDFSEDRIIEFKEAFLLFDRTGDGKISYSQCGDVMRALGQNPVNAEVLKVLGNPKSEEMNHKMLDFEQFLPMLQAIAKNKDQGSFEDFVEGLRVFDKEGNGTVMGAELRHVLTTLGEKMTEEEVETLLAGHEDANGCINYEELVRMVMSG	151	2	0.013245
Cytochrome c oxidase polypeptide VIc precursor	225703464		9 kDa	MSLAKPAMRGLLGKRLRFHLPIAFALSVVAAAAFKYGVTEPRKQAYADFYKHYDATKEFNNMREAGIFESVRPTGE	76	0	0
60S ribosomal protein L7	225703630		29 kDa	MADAEKKVPAVPESLLKRRKAFATMKTMRIKKMFAEKKTRKVTRKLIYKRAEKYHKEYREMYRREIRMGRTARKVGNFYVPAEPKLAFVIRIRGINGVSPKVRKVLQLMRLRQIFNGVFVKLNKASINMLRIAEPYIAWGYPNLKSVRELIYKRGHGRMTKQRIALTDNALVEKALGKYSIICVEDLIHEIYTVGKNFKPANNFLWPFKLSTPRGGMNKKTTHFVEGGDAGNREDQINRLVRRMN	245	1	0.00408163
Thioredoxin-dependent peroxide reductase, mitochondrial precursor	225703802		27 kDa	MSSLSKHFMATDAKVATGGLKVSASPHGNSVNKASRILTCPVLQKTCFSTSTAGWAPAVTQHAPHFKATAVHNGEFKEMSLDDFKGKYPVLFFYPLDFTFVCPTEIISFSDKASEFHDINCEVVGVSVDSHFTHLAWINTPRKAGGLGDIHIPLLADLNKQVSRDYGILLEGPGIALRGLFIIDPSGVVKHMSVNDLPVGRCVDETLRLVRAFQFVETHGEVCPASWTPNSHTIKPTPEGSKEYFEKVNN	250	6	0.024
NADH dehydrogenase 1 alpha subcomplex subunit 13	225704142		17 kDa	MAVSKVKQDMPPPGGYGPVDYKRNLPKRGLSGYGMLAIGVGVMCFGYWRLFKWNRERRRLQIEELEARIALLPLLQAEQDRRQLRMLRENLEEEAVVMKDVPGWKVGENVFHTDRWVAPLTEELFNLRPREELLHKRFGFLWYV	144	1	0.00694444
Barrier-to-autointegration factor	225704258		10 kDa	MSSTSQKHKEFVAEPMGEKLVNALAGIGEVLGKRLEEKGFDKAYVVLGQFLVLKKDEELFRDWLKDTCGANVKQQGDCYGCLREWCDSFL	90	4	0.0444444
Ubiquinol-cytochrome c reductase complex 14 kDa protein	225704264		16 kDa	MVPYQNPLSHQLRNVGMSLKEWQTALAATGRLLVGFRKWYYNAAGFNKIGLMRDDTIHEDGDVKEALRRLPEKVYNDRMFRLKRALDLSMKQAVLPKEQWTQYEEDVHYLEPYLEEVIRERKEVEEWSKK	130	0	0
40S ribosomal protein S16	225704420		16 kDa	MPAKGPLQSVQVFGRKKTATAVAHCKRGNGLIKVNGRPLEMIEPATLQYKLLEPVLLLGKERFAGVDIRVRVKGGGHVAQIYAIRQSISKALVAYYQKYVDEASKKEIKDILIQYDRTLLVADPRRCESKKFGGPGARARYQKSYR	146	2	0.0136986
Cytochrome c oxidase subunit VIIa-related protein, mitochondrial precursor	225704492		12 kDa	MYYKLNGVTQRLAGSAPSAYSPQGLRVTVPMEAPPMIFATPTKYVSEAGNTVEYLGHNKVPDLQKLFQKSDGIPVHLKRGLMDKMLYRTTMGLTIGGTLYCLMALYIAAQPRK	113	1	0.00884956
40S ribosomal protein S14	225704532		16 kDa	MAPRKGKEKKEEQVIALGPQVAEGENVFGVCHIFASFNDTFVHVTDLSGKETICRVTGGMKVKADRDESSPYAAMLAAQDVAQRCKELGITALHIKLRATGGNRTKTPGPGAQSALRALARSGMKIGRIEDVTPIPSDSTRRKGGRRGRRL	151	3	0.0198675
CD63 antigen	225704996		26 kDa	MGVEGRMKCVKHLLFFFNFIFWLCGLALVVLGVLVQVALHSTVVINNVSASSAPLVLIVVGVIVFFIAFFGCCGAWKESYCMVTMFSILLGLIIITEIGAAIAGYVFRGKLTVIVHDGLNDMVTKYSNGTAEFKKALDNLQVDLKCCGVTNATDWKGKFGSVPDSVPDSCCINVTAGCGQGAMGDALKIHQTGCETVVEKLLKKNIMWVIVAALVIAFLQIMGIIFACMLMGGIRSGYEVM	241	12	0.0497925
60S ribosomal protein L30	225705054		13 kDa	MVAARKTKKSLESINSRLQLVMKSGKYVLGYKQSQKMIRQGKAKLVILANNTPALRKSEVEYYAMLAKTGVHHYSGNNIELGTACGKYFRVCTLAIIDPGDSDIIRSMPDQPQGEK	116	2	0.0172414
Cell division control protein 42 homolog	225705502		21 kDa	MQTIKCVVVGDGAVGKTCLLISYTTNKFPSEYVPTVFDNYAVTVMIGGEPYTLGLFDTAGQEDYDRLRPLSYPQTDVFLVCFSSVSPSSFENVKEKWVPEITHHCPKTPFLLVGTQIDLRDDPSTVEKLAKNKQKPISPEMAEKLARDLKAVKYVECSALTQKGLKNVFDEAILAALEPPEPKKRRKCVLL	191	6	0.0314136
Cytochrome c oxidase polypeptide VIa, mitochondrial precursor	225705586		13 kDa	MAAFGRISQTLLRSSLIQTRQLSATAAHGHAEQTARTWKILSFVVALPGVAVCMLNMYLKMQHHAAHHVEPEFVPYSHLRIRSKRFPWGDGNKSLFHNPEVNALPDGYEGRDE	113	1	0.00884956
neural cell adhesion molecule 1 isoform 1	317383782		88 kDa	MLQTRYLIWALLFGYAASLQVEITPMQGEISMGESKFFLCEVVGDVKDIDWYAPNGEKLLPNRQDILVNRNDESSSTLTIYNANVDNAGIYKCVAKNGDKESQGTVNVKIFQKITFKNAPSPQEFNEGDDADIICDVVSSPPADIIWKHKGSKIQVAKDVRFKILTNNHLQIRGIKKTDEGAYTCEARVMTRGEIDLKIIKVIVNVLPSIRTRQSEMNATADVNQSVMLACDADGFPEPTVTWARNNIVLESDDKYGLNNDGSELIIKDVKKVDEGDYTCIARNKAGEKEEEVSLNVFVQPKITYLVNQTASELEEQITLTCEASGDPTPTITWSFGRRIFTEGEQSLDGNVVVRSHARVSSLTLKYVQFTDAGHYLCTARNSIGQDQQTMYLEVRYAP…	799	14	0.0175219
plasminogen activator inhibitor 1 precursor	390098375		43 kDa	MLCLYVGFFLGLSGAAISNLQEKQTDFGMRVFSQVAQNSKGSNLAFSPYGVATILAMAQLGAGGNTLKTLNAKLGFSLQERGMARQQRLLQRDISSEEGVELASGVMVERKMALEKGFRRGLGKAFQASPHQLDFSRPDQALDIINAWVSDHTAGTIPSFLSSGALTDETRMVLLNALHFQGLWKVPFDPKMTEERLFHCANGSSVPVPMMRLTHRFKYGEFVTPDGVDYDVIEVPYEGESLSMLLVSPFEPETPVSSLSSELTTQRLQQWRQEMRSVKRQLVLPRFTLDSEVELKSILIQMGLGDMFNLAKADFTRITTEQPLCVSKVLQKVKIEVNEEGTKASAATAAILFSRMAVEEITMNRPFLFLIHHKSTGAVLFMGQVNQPQQH	391	3	0.00767263
dnaJ homolog subfamily A member 3, mitochondrial	641956083	158	17 kDa	ACVFCPTVNTGPFVMRSTCRRCNGKGTVISTPCNSCHGTGQTRQKKTVRVPVPAGVEDGQTVRMPVGKKEVFITFRVQKSPVFRRDGADIHSDVLISVAQAVLGGTARAQGLYETVNLSIPAGIQTDQRILLSGKGIARISGYGYGDHYVHVKVRVPK	158	6	0.0379747
S100 calcium binding protein A10b	641964183	101	11 kDa	MPSQLESSMESLITVFHRYADKDGDCNTLSKKELKELMQTELASFLKSQKDPAAIDKIMKDLDQNGDGKVNFEEFVSLVVGLSIACEQIYQLHTQKASAKK	101	2	0.019802
aldehyde dehydrogenase, mitochondrial-like, partial	642007003	291	33 kDa	HLKELSHCFHRANVFWCISVCMRMNPVLSKQLHALCVQVGHLIQQASGSSNLKKVTLELGGKSPNIIMSDANMAEAVEQSHFALFFNQGQCCCAGSRTYVQDTIYDEFMERSVERAKSRVVGDPFNMKTEQGPQVDEEQFKKILGYISSGKREGAKLMCGGGWHDHRPTHLLPEQYDSCIVPCCLYSHTIIFGPVMQILKFKTLEEVVERANDTKYGLAAAVFTKDIDKAHYISSGIRAGTVWINCYNVFGAQAPFGGYKYSGNGRELGEYGLDNYTEVKTVTIKVPQKNS	291	12	0.0412371
ATP-binding cassette sub-family B member 7, mitochondrial	642014826	269	30 kDa	MWTIILTLYDVQKFPPLSVPVFYYTILSDLTLPPSLSVPVFYYTILSDLTLPPSLSLSLPLNFLGTVYRETRQALIDMNTLFTLLSIDTKIKETDLAPSLSVTPQEATIRFEDVYFEYLEGQKVLEGVSFQVPAGKKVAIVGGSGSGKSTIMRMLFRFYEPQKGNIYIAGQNIRDVGLDSLRRAVGVVPQDAVLFHNTIFYNLQYGNINATPEEVYQVARLAGIHDAILRMPHGYDTQVGERGLKLSGRDGGDAWHGCLWTDNMVIDCL	269	2	0.00743494
methylcrotonoyl-CoA carboxylase beta chain, mitochondrial	642019122	275	30 kDa	MLLQTFRPWLTLLRCRGLPVATTRLYHGDRVAAVGTQPDTQSAEFAENYERMQVLVDELKGRSEKIKLGGGERARKLHISRGKLLPRERIDRLLDPGSPFLEFSQFAAYELYGKEEVPAGGIITGIGRVSGVECVIVANDATVKGGTYYPVTVKKHLRAQEIAQQNHLPCIYLVDSGGANLPRQAEVFPDRDHFGRIFFNQARLSSDGIGQIAVVMGSCTAGGAYVPAMADESIIVRKQGTIFLGGPPLVKAATGETVSAEDLGGADLHCRYQAV	275	5	0.0181818
acetyl-CoA acetyltransferase, mitochondrial precursor	642019131	322	34 kDa	MSSSGLLTMRSQICKRLAHKYLSRTYSTRPSLNEVVIVSAVRTPMGSFRGSLAAVPATKLGSIAIKGAIEKAGIPVEEVKEVYMGNVLQAGEGQAPTRQALLGAGLSLSTPATTINKVCASGMKSIMLAAQSLMCGHQDVMVAGGMESMSNVPYVMTRDTPSYGGVRMEDLIVKDGLTDVYNKFHMGNCAENTAKNSQISREEQDAYAISSYSRSKAAYESGVLAKEIVPVSIPQRGKPDVVVSEDEEWRRVDFSKVPKLRAVFQKENGTVTAANASTLNDGAAALVLMTVDAAKRLGVTPLARIVCKTPPPHVAQYQTVVT	322	5	0.015528
sister chromatid cohesion protein PDS5 homolog B	642022993	447	49 kDa	PLKCIVTLNIVVSDAGSKAVFAKVMVITRNLPDPGKAQDFVKKLAQVLDDDERIRNQLETLVSPACSCKQAQVCVRDFTRKPGSPKQPMDLNRCVVYIRYASYLPHSQHTDTEPLDALVKQVNKSIDGTAEDDEEGVPTEQAIRAGLELLKVLSFTHPVSFHSAETFESLLGCLKMDDEKVAEAALQIFKNTGSKMEESFPHIKSVLLPVLQIKAKRGPPRQAKYAIHCIHAMFTHRDTHFAQIFEPLHKGLDLEDLDQLITPLTTLGHLALLAPEQFAAPLKSLVANFIVKDLLMSDRIPGKKTTKLWVPDDEVSSETLAKVGFPSSSTSSLNLPPPPSTYHLSSTSFTSFLNLPPLLNLLSQPPLPLPPPFPTSPLLYLLHLLPQSPLSSTSFPNHA…	447	7	0.01566
60S ribosomal protein L38	642025204	122	14 kDa	MVCRSLIYRYYFRPFRPLSCRLCFSPLTRQDVNPCSCVVVAEHCTYYLPIVFQPRKIEEIKDFLLTARRKDAKSVKIKKNKDNVKFKVRCSRYLYTLVITDKEKAEKLKQSLPPGLAVKELK	122	7	0.057377
uncharacterized protein LOC415253	642031862	126	14 kDa	MAARLLLRSAVRAATTCRAAPVPALTRGMAVGGIPTDEEQATGLEKIVMKAAQQGADPYSMLKPKEYAGSKADPHLVPSITTKRIVGCVCEEDNTAVVWFWLHQGDAQRCPSCGSHYKLVPHELPH	126	5	0.0396825
inactive tyrosine-protein kinase 7	642034334	484	54 kDa	SLSLSLSLSLSPPPPPPPLTEIEDMSPRQSRVFTADTMQRVSCMAPRGKPQPEREGVRVPTEGRVYQEGSELVFSPTEQGDSGSYTCVAQNKAGRKTQELTFTVATAPVWVTKPQDSYLEEGRPGYLHCHAQATPEPEVTWHRNSILVMPEDPRFTVFPNGTLRINNVEVYDGQMYACVSRTEGGKLSGNARVYVLEKLKFTPTPQPSQCLELDKEVNIQCSATGRETPIIKWTKADGGELLPHVEMRNSQLHFTKVTRSDAGNYTCIASNSLQGEIRAMVGLTVAVYIRFKLEPENTTVYQGHTAILHCQATADPEPRVQWMVKDKVLDTSRRRFQLMVNGSLVITDVTTDDTGKYTCIAGNSCSISDRVAQLYVVEKPVQTLVDHEEKAPYKMIQTI…	484	16	0.0330579
60S ribosomal protein L10	642035115	117	14 kDa	MGRRPARCYRYCKNKPYPKSRFCRGVPDPKIRIFDLGRKKARVDEFPLCGHMVSDEYEQLSSEALEAARICANKYMVKTCGKDGFHIRVRLHPFHVIRINKMLSCAGADRYSTVLNS	117	7	0.0598291
fibronectin isoform X1	642041819	248	27 kDa	MGPPTDVSGYRVTVAPIGPDGTPQRELQLPVTRNAYAEVTHLTPGTPYLFSIYTIKGGEESQPLVAEQATKPDSPADVHFTNVTEDSALIMWVPPRARITGYRLFLTLEGSNPKQLRLPARLSQYTLLNLRPDTEYTAILHSEQDNTLSEGASRSFSTTQLMGNAPRFSTDVTDTSIIISWTPVPRVGYKLTVRPSQGGEAPRDVTSNSGSIYISGLTPGVEYTYSVQPIVNGYEQGNPITRRIVTRE	248	0	0
unconventional myosin-Ic isoform X1	642042410	830	95 kDa	MESALTARDRVGVQDFVLLENHTSEAAFIENLRKRFKENLIYTYIGSVLVSVNPYKDLEIYTKNHMERYRGVNFYEVSPHLTQSWTNSYVTERFSECLLDIRYVEPSPPCAQCSRLRCSSGGTEINWRRVERRKAGLMAFGNAKTLRNDNSSRFGKYMDIQFDFKGAPVGGHILNYLLEKSRVVHQNHGERNFHIFYQLIEGGEEDLLRRLGLERNPQQYQYLVKGNCPKVSSINDRSDWKVVRKALSVIGFSEDEVEELLNIIASVLHLGNIQYGGEDSGNAYITTDTQIKYLARLLGVDGLVLKEALTHKTIIAKGEELKSPLNLEQASSARDALSKAVYGRTFTWLVNKINVSLAYKDETYKNASVIGLLDIYGFEVFQHNSFEQFCINYCNEKLQ…	830	21	0.0253012
peroxisomal multifunctional enzyme type 2	642043759	737	79 kDa	MSVPLVFDGKVVIVTGAGGGLGREYALAFGVRGASVVVNDLGGDIKGGGKSSNAADKVVEEIKAKGGKAVANYDSVEDGEKLIQTALDAFGRIDIVVNNAGILRDRSFGRTSDLDWDLIHRVHLRGSFMVTRAAWNHMKKQKFGRIIMTSSAAGIYGNFGQANYSAAKLGLLGLANTLAIEGQKYNIHCNTIAPTAGSRLTETVMPPVLCESLKAEYVAPLVLWLSHDQCQENGGLFEVGAGWIGKLRWERSQGRIVRKKNQGMFPETVRDQWDNICDFTNATKPANINESVATLVEVLSRVETDEGIAPNPTSAMATAASGISPLEAVGQKLPESTFSYSQTQCILYALGVGMSTKDDDHLKFLYEGHEDFSCLPTFGVIPSQAAMMDGGLGSVPGLN…	737	9	0.0122117
filamin-A isoform X2	642043932	644	69 kDa	MPSGKTAQPEIMDNKDGTVTVKFAPTEAGLHEMHIKYNGTHIPGQHTPHARTRNVHAHTTCTFRCLLVCFAGRIAGCGTKANISNAGTQISNTHTGHRGVMNILSGFLCVDDIPGRGERQREEEGEEARGRRRGRRRGGGGGGGGERREEEERRRRREEXXYLPPFLSLSLSLPCPIYSSPFLSPLSHLFFPPFLSLSPRYSFIPREVGEHVVSIKKNGCHVPNSPITIMVVQSEIGDASKVKVYGQGLVEGHTFDMSDFVVDTREAGYGGLALSVEGPSKVDIQTQDVEDGTCVVSYCPSEPGSYIVSVRFADQHVPGSPFTVKVTGEGRIRESVTRRQKAASIATVGSVCDLNLKIPEIDIHDVSAQVTSPSGATEKADMEAVGPSTYCVRFVPHEM…	644	14	0.0217391
medium-chain specific acyl-CoA dehydrogenase, mitochondrial	642045184	422	46 kDa	MLFNKALRGGVQSVLRLQSTNAAAVAATSSQNAPSTGFCFEMTDQQKEFQELARKFSREEIVPVAAAYDRSGEYPFPIIKRAWELGLMNSHIPEDCGGMGLGIFDSCLITEELAYGCTGVQTAIEANSLGQMPVIIAGNDFQKKKYLGRMTEEPLMCAYGVTEPGAGSDVAGLKTRAEKKGDEYVVNGQKMWITNGGKANWYFLLARTDADPKCPTSKAFTGFIVDADSPGILVGRKELNMGQRCSDTRGITFEDVRIPKENVLIGEGAGFKIAMGAFDKTRPPVAAGATGLAQRALDEATGYALERKTFGKLIAEHQAVSFLLAEMAMKVELARMGWQRSAWEVDNGRRNTYYASIAKAFAGDIANQVASDAVQVFGGNGFNSEYPVEKLMRDAKIYQ…	422	7	0.0165877
CREB-binding protein isoform X3	642048640	1379	154 kDa	CLLLPRRVYISYLDSIHFFKPRATLKCMTLNLKSVLPSLVPCSYVYGHIWACPPSEGDDYIFHCHPQDQKIPKPKRLQEWYRKMLEKAFAERILHDFKDIFKQATEDRITSANEMPYFEGDFWPNVLEESIKELEQEEEERKKEENVASCETPEHTADSKNAKKKNNKKTNKNKSSVSRANKKKPGMPNVANDLSQKLYSTLEKHKEVFFVIHLHAGPSVNTLPPIMDPDPLLTCDLMDGRDAFLTLARDKHWEFSSLRRCKWSTMCMLVELHNQGQDRFVYTCNECKHHVETRWHCTVCEDFDLCINCYAAKGHEHKMVKWGLGLDDDSNGAGGAGGEASQSPQESRRLSIQRCIQSLVHACQCRNANCSLPSCQKMKRVVQHTKGCKRKTNGGCPVC…	1379	35	0.0253807
heat shock protein 75 kDa, mitochondrial	642048641	119	13 kDa	MRNNLGNRVTNIKVTPRLDTHPAMITVLEMGAARHFLRTQQMARSTEERAQILQPTLEINAGHDLIKKMHSLKESDSALAQLLLEQIYDNAMIAAGLNDDPRPMIARLNNLLTRALEKH	119	0	0
serine/threonine-protein phosphatase PP1-beta catalytic subunit	642049239	299	34 kDa	MSEAEVRGLCIKSREIFLSQPILLELEAPLKICGDIHGQYTDLLRLFEYGGFPPEANYLFLGDYVDRGKQSLETICLLLAYKIKYPENFFLLRGNHECASINRIYGFYDECKRRFNIKLWKTFTDCFNCLPIAAIVDEKIFCCHGGLSPDLQSMEQIRRIMRPTDVPDTGLLCDLLWSDPDKDVQGWGENDRGVSFTFGADVVSKFLNRHDLDLICRAHQVVEDGYEFFAKRQLVTLFSAPNYCGEFDNAGGMMSVDETLMCSFQILKPSEKKAKYQYGGMTSGRPVTPPRTAVPPKKR	299	13	0.0434783
integrin beta-4 isoform X1	642056071	1742	194 kDa	ISLPPSLSLHPSISLPPSFHLSPSISLPPSFYLSLPPSISLPPSFHLSPSILPSLSLHLSPPSFISRSLIPPSLSLHLSPSILPSLSLHPSLEPEDRHRSQVAPQDMSMTLLPGEEREIEMEVFEPAKGPLDLYILMDFSNSMKDDLDNLKRMGAELADLVGKLSDDYTIGFGKFVDKVVEPQTDMRPIKLAQPWPNSDPPFSFRNVITLTPDLQSFTQKLQKERISGNLDAPEGGFDAILQATVCGKGEAAIFGVPFGMFDYLKLVKLTDAPLWALLARETHVYVAKASEKTINKSEKTQNNINKKQLEMISKHCTQQSFKKIKTFQVLAMLDLFSNSLWVYGLWEIPVSNGVIHLIGVQLRSDYGDLSIARLYSTESVHSQGLSSFWVSQSVQVFCP…	1742	33	0.0189437
elongation factor Tu, mitochondrial	642056264	268	29 kDa	MAALVGLRACFSALQLSSPGLLHSSYKLCAVPFTRRNFAAEAKAKKTYARDKPHVNIGTIGHVDHGKTTLTAAITKVLAEAGGARYKKYEDIDNAPEEKARGITINASHVEYTTANRHYAHTDCPGHADYVKNMITGTAQLDGCILVVAATDGQMPQTREHLLLARQIGVEHVVVFVNKADAVEDKEMLELVELEIRELLTEFGYDGENTPVVIGSALCALENKQPDLGVNAVLKLLAVVDEYVPLPKRELEKPFLLPIEGVYSIPGD	268	5	0.0186567
uncharacterized protein LOC563253	642059405	362	40 kDa	MAESETECDTPGLDTLGSECVIAHSQVDLHYAAETEIMTEEKRGLELEIHGADLAKIEGLTAVACVDAMVTETDHDYVTKMDHHGEIQCFTMGGEGKGEALLGEVLLKTETEHMVKVESDHVGGELTVESENGVVIHEAHGLQCNDFAVESSLKQHMKIHMKEKAYATTGVEMVGKGVIDTFNLKSHQMIHSPEKPHRCSECGKSFAAAITLREHMKMHSEDKPYKCTQCRKSFIRRRHLKKHQELHAREKPFTCSQCGKGFTTSSNLKQHQRTHAGDKPHRCTQCGKCFAAASTLREHQRIHSXXXXXXXAAVPSTKGFPHTTILKQRILASEKPYRCSQCGKGFNHSSSLSRHHRIHIDQ	362	16	0.0441989
elongation factor 1-beta	642060585	222	24 kDa	MGFGDLKTPGGLKVLNDFLADKSYIEGWVPSQADVAVFDAIPSAPSTVQCHALRWYNHIKSFQNQKGSLPGVKKPLGQYGPSGVEDNTAADSKDDDDDMDLFGSDDEEDAEAERLKEERIAAYAAKKSKKPTLIAKSSILLDVKPWDDETDMAKLEECVRSISMDGLLWGQSKLVPVGYGIKKLQIGCVVEDDKVGTDQLEEQITAFEDYVQSMDVAAFNKI	222	3	0.0135135
heterogeneous nuclear ribonucleoprotein H1 isoform X1	642060751	408	44 kDa	MSDGEGYVVRMRGLPWSCSVDEIQRFFSDCKIANNGTSIHFTSTREGRPSGEAFVELENEDDLKIAVKKDRETMGHRYVEVFKSNNVEMDWVMKHSGSSSPETTGDGLVRLRGLPFGCSKEEIVQFLSGLEIVPNGITLPLDFQGRSTGEAFVQFASQDIAEKALKKHKERIGHRYIEIFKSSRAEVRTHYEPQRKPMGMQRPGPYDRPSGGRGYNMMGGRGGGSYDRARRGGYGGGVSDGRYGDSSSSFQSTTGHCVHMRGLPYRATETDIYNFFSPLNPVRVHVEIGPDGRVTGEADVEFATHEDAVTAMSKDKANMQHRYVELFLNSTAGGSNGSYGSPMQGGMGNQSSYSSGGLSSGYSGGYSSQGSMGGYSDYSNQGGMSSSYYSGGGRGDRSS…	408	4	0.00980392
vinculin isoform X2	642063142	881	97 kDa	MLKADPYSVPARDYLIDGSRGILSGTSDLLLTFDEAEVRKIIRVCKGILEYLTVAEVVESMEDLITYTKNLGPGMTKMAKMIDERQQELTHQEHRVMLVKSMNTVKELLPVLISGIKIFVTTKTSGSQGVEESLKNRNFTFEKMSAEINEIIRVLQLTSWDEDAWANKDTEAMKRALALIDSKMTQAKSWLRDPDAQPGDAGEQAIRQILDEAGKVGELCAGKERRDILGTSKTLGQITDQVSEMRARERLWTFNFQYVIIVSHHRGKGDTPEARALAKQIATALQNLQSKTSKAVANSRPAKAAVHLEGKIEQAQSWMENPTMDDGGVGQAAIRGLVAEGRRLANALPGPYRQELVGKCEQVEQLMAQLADLAARGDGESPQARAVAQHLQESLKNLK…	881	7	0.00794552
unconventional myosin-Ic isoform X1	642067662	1051	121 kDa	MRYRGREVGGEGRVHRVMESTLTARDRVGVQDFVLLENYTSEAAFIENLRRRFGEKLIYTYIGSVLVSVNPYKDLEIYSKAHMERYRGVSFYEISPHIYAVSDNTYRAMRTERRDQCILISGESGAGKTEASKKILQYYATTCPVTDHMSTIRDRLLQSNPVLEAFGNAKTLRNDNSSRFGKYMDVQFDFRCCTETQPKTPNSKQCRCRSTVARKNSLERPKPRKKPREEPXXXXXXXYYVVRSVCVCVCVCVCVCVCVCVCVSINDKSDWKTVRKALTVIGFHEEEVEDLLNIIASVLHLGNTQFGEGEDGETQITTEPQLTYLSKLLGVDGPALREALTHKKLTAKGEEMIGPLSFEQAVAARDALAKAVYGRAFTWLVAKINQSLAFKDEVYNSSK…	1051	28	0.0266413
magnesium transporter MRS2 homolog, mitochondrial isoform X1	642067956	238	27 kDa	MEACFKSFTMGGLRRSLDIKFRVLAGFLTCRTVSCSRSPIKCQLSKHQPVTRGKATLLRSCPSAYFIRHRGTEASLSSVAPAFVMMKFDKDGNVTTFEKKKMELYHELSLQARDLRFQHLTSITARNNNIIIRMEALKAVVTPNSLLVLDFRGLGLERWLVLELAPQLNGDHGALATHSLPFEFRALEAILQHRVNTLQARLNEVHPVILDILESLVDPKLLSADRSKLHILLQNSKK	238	5	0.0210084
NAD(P) transhydrogenase, mitochondrial	642068462	406	43 kDa	MSSLLRCVSCCGSTVTLLQQGVRHHTPGRRAFRTFPQLWNCEPAKGRLYKDLVVGVPKEIFKNERRVAVSPAGVELLVKQGFNVQVESGAGDHAKFSDQMYINSGASITDTNGAFGSDLVLKVRAPVLNEATGKHESELLKPKSTLVSFIYPAQNPDLMEMLAQSQTTVLAMDQVPRVTIAQGYDALSSMANIAGYKAVVLAANHFGRFFTGQITAAGKVPPAKVLVIGGGVAGLAAAGAAKSMGAIVRGFDTRPAALEQFKSFGAEPLEVHVKESGDGVGGYAKEMSPEFIAAEMELFAKQCKDVDILISTALIPGKRAPILIKTEMVESMKDGSVVVDLAAEAGGNIETTKPGELHVHKLCVCFXXXIYQNNPAPSLLPGFPAPFHSSLFTISSSEL…	406	7	0.0172414
long-chain-fatty-acid--CoA ligase 4	642071534	711	79 kDa	MGLHQSELHSLLLLPLHLVVWLYSLLSFLPWYYFTRAGEKRTRATRVKARSTSGCSEGPYRCVDRFQSLATEDFPGKDTLDKLFQQAVQRFGDSDCLGTREVLSEENEPQPSGKVFKKLILGEYCWLSYQQVDSVVSYMGSGLAALGQQSKSMVAIFCETRAEWMISAQACFRYNFPLVTFYATLGEEAVAFGLNETGVTHLITSTELLETKLKGVLSQIPKLKHIISVDQRRVSTEGYPPGLAIHSMASVQELGSQPDNLARPVVSPQPSDLAVVMYTSGSTGRPKGVMVVHSNLTAGMTGQCERIPGLGPKDTYIAYLPLAHVLEMTAEISCMAYGCPIGYSSPQTLSDQSTKIKRGSRGDSSVLKPTLMAAVPEILDRINKNVMRKVGEMSYIQRT…	711	21	0.0295359
H2A histone family, member Y	642072054	217	24 kDa	MAAYTFVFIIVTDHFFYFQTHHLQLDTNILEDTCLAKSRTTMASPIPEPHTGSDTMSSRGGKKKVTKMSRSTKAGVIFPVGRMLRYIKKGLPKYRVGVGAPVYMAAVLEYLTAEILELAGNAARDNKKGRVTPRHILLAIANDEELNQLLKGVTIAAGGVLPNIHPELLAKKRGSKGKLEAVITPPPAIKKSKMSASKKSAKKAAAGKRAKAKVYNM	217	1	0.00460829
eukaryotic translation initiation factor 2 subunit 3	642072707	490	53 kDa	VKSFRQSPQHTEIPFMFKMAGDESGITLGQPHLSKQDLNSLDVSILTPLSQEIISRQATINIGTIGHVAHGKSTVVKAISGVHTVRFKNELERNITIKLGYANAKVYKLDDPSCPRPECYRSCGSSTPDEFPTDIPGTKGNFKLVRHVSFVDCPGHDILMATMLNGAAVMDAALLLIAGNESCPQPQTSEHLAAIEIMKLKHILILQNKIDLVKESQAKEQYEQILAFVQGTVAEGAPIIPISAQLKYNIEVVCEYIVKKIPVPIRDFTSEPRLIVIRSFDVNKPGCEVDDLKGGVAGGSILKGVLKVGQELEVRPGIVSKDHEGKLMCKPIFSKIVSLFAEHNDLQYAAPGGLIGVGTKIDPTLCRADRMVGQVLGAVGALPEIFTELEISYFLLRRL…	490	10	0.0204082
heterogeneous nuclear ribonucleoprotein L	642073130	538	59 kDa	MAMAGRYYEGGRATKRLKTNDGMTTEGYDDPHKTLPSPVVHVRGLVDGITEADLVEALQEFGAISYVVVMPKKRQALVEYEDLNGSCTAVTYANDNQIYISGHPAFVNYSTSQKISRPGDPDDSRSVNNVLLLTIMNPIYPVTTDVLYTVCNNCGPVHRIVIFRKNGVQAMVEYPLPLSAQRAKASLNGADIYSGCCTLKIEYAKPTRLNVFKNDQDTWDYTNPNLGGQDAEADGNGSNAGEDGSANPNKRVRAPALLGDHPPEYAGGYHGYDESGYGPPPPPHYSEGRRMGPPMRGRGGAHSYGGGPGYGPPPPPPGEYSAHADSPVVMVYGLEPAKMNADKVFNVFCLYGNVERVKFMKSKPGAAMVEMGDCYAVDRAITHLNNNFLFGQKLNVCVS…	538	11	0.0204461
nucleoprotein TPR isoform X2	642073755	1894	212 kDa	TVFQEVHRLQKVTDEANKRSSVLERDNQRSDVQLADMGQQIRVLLIELEEARGNHVAHDEEVSSADISSTSEVITQHLVTFRGVEELQQQNQRLLVALRELSEAQEREEEETTGTKCSELERSLEKAQVELEALREQRGHQMQLAESIVRQRDMYRVLLAQATGVSFPQQDAAAAEEFSSTPRRSPAATPTTPTGIITMATESTEVVEAKAALRQLQEVFSSYKRERSESDKALMEQSEKLQKQLSDQRFQNAKISTQLEFTSKRYEMLQDNVKGYRKEIASLMEKGQKMAAAAQTCEQTVHTMTQDLRVAQEKLNMAEGRAESLRKEREMLKLVESRLTQEKETMQTQQRGQNMLLTNLKTIEATLERSETDTRQRLNAQIEKQEREIGQLQKRLEHE…	1894	6	0.0031679
mitochondrial import inner membrane translocase subunit Tim23	642074471	206	21 kDa	MDNNAPGSGGKGGFGSLFGGSEYSNTELAGVPLTGMSPLSPYLNVDPRYLVQDTDEFILPTGASKTRGRFELAFFTIGGCCITGAAFGTVNGLRMGLKDTREMGWTKPRNVQILNMVTRQGASWANTLGSVALLYSVFGVAIEKARGAEDDINTVAAGTLTGMLFKSTGGLKGVARGGLVGLALSGAYALYSNWDHIRGGSSSSLY	206	2	0.00970874
NADH dehydrogenase	642075481	474	52 kDa	MLSLSRLALVCAAARGPVAVCQGRVTSITRFNSTTVEAPPKKTTFGPLADQDRIFTNLYGRHDWRLKGAQSRGDWYKTKEILLKGVDWILNEIKVSGLRGRGGAGFPTGMKWGFMNKPSDGRPKYLVVNADEGEPGTCKDREIMRNDPHKLVEGCLVAGRAMGARAAYIYIRGEFYNESSNLQVAINEAYAAGLIGKNSCGSGYDFDVFVMRGAGAYICGEETALIESLEGKQGKPRLKPPFPADVGVFGCPTTVANVETVAVAPTICRRGGTWFLGFGRERNSGTKLFNISGHVNTPCTVEEEMSIPLKDLIERHAGGVRGGWDNLLCVIPGGSSTPLIPRSVCDTVLMDFDGLVQAQTGLGTAALIVMDKSTDVIRAIARLIEFYKHESCGQCTPCR…	474	15	0.0316456
FACT complex subunit SSRP1	642076777	401	45 kDa	MSGSLYEMVSRVMKALVNRKITVPGNFQGNTPGAQCITCSYKAQSGLLYPLERGFIYVHKPPVHLRFEEISCVNFARGTTTTRSFDFEVETKQGNQFTFSSIEREEYGKLFDFVNAKKLNIKNRGFKEGMKSKNNEYSDSDEDQHDAYLERMKAEGKIREEGDGSNDSDEDTDESFNPGEESDVAEEYDSNASESESGSGGDGSDDEGKKKTAKKAKVVKERKPRKEKKQKDTNAPKRPMSSYMLWLNSSREHIKSENPGISITEISKKAGEMWKQIGKDDKEGWDRKAEEAKKNYEKAMKEYRENGGGSSTPSKKESKKAGGKKEDKAGGKKRKSDRGEEEKEQGGNDSFKSREFISSEESSSEGERKKAKKAKGKPKGKESEEEEEVVTTPPSSEED…	401	3	0.0074813
epithelial chloride channel protein-like	642078556	147	16 kDa	MASKAAAVLLLVYLSGSTFGIKLTGNGYTDILIAINPEVPEDPVLITQIKEMFKEASRHLLNATKKHLYFKEVAILVPPNWNKGNYPKAKTEVYDKANIIIDEPNKLHGDQPYTLQYGECGSEGRYIHLTPDFMLNDDVSKYYGPRG	147	1	0.00680272
mitochondrial 10-formyltetrahydrofolate dehydrogenase	642079007	923	102 kDa	MLWTANIIIRKFSTSSNYYQNKLRLALIGQSLFGQEVYTNLRKQGHRVVGVFTVPDRDGKADPLAVVAEKDGTPVFKFPRWRVKGEPIPEVVEAYKAVGAELNVMPFCSQFIPMNVIDHPAHGSIIYHPSILPLHRGASAINWTLIQGDKKAGFSIFWADDGLDTGPILLQRECPVEPNDTVDSLYNRFLFPEGIKAMVESVQLIADGKAPRVPQTEEGASYEGIQKKSNSKVNLAQPAEAIHNWIRGHDKVPGAWAVIDGQTVTLYGSSVLGESVPAGQPLEIEGASQPGVVTKNGLVLYGSDSKALMVKNLQFQDGKMISAAKYFSSGDTARVELTDDEKKIAEEIRDIWKGILSNVAAIEETTDFFKSGAASMDVVRLVEEIKQRCVGLQLQNEDV…	923	12	0.0130011
extended synaptotagmin-1	642079144	255	28 kDa	MDLDIVHKARVLDEWFSLKDVPSGSVHLRLEWLSLLSSADRLNEVIQRNQNMTCKTADPPSAAILAVYLDRAQDLPMKKGNKDPSPMVQLSVEDTTKESKTCYLTTDPVWEVAFTFYIQDPRKQDISIQVKDDDRALSLGSLSIPLSRLLASPDLSMDQWFQLDNSGQASRIYINAVLRVLYLNEDASPTSPVSPHPLSPGSGHGDGGISSEVAPGGVSGAPKLVPTRPQQTTPDSDFASEVSPLTETHTHTHTH	255	2	0.00784314
ATP-binding cassette sub-family E member 1	642080333	599	68 kDa	MSEKNTRIAIVNHDKCKPKKCRQECKKSCPVVRMGKLCIEVTAQSKIVWISESLCIGCGICVKKCPFGALSIVNLPSNLEKETTHRYCANSFKLHRLPIPRPGEVLGLVGTNGIGKSTALKILAGKQKPNLGKFDAPPDWQEILTYFRGSELQNYFTKILEDDLKAIVKPQYVDQIPKTVKGTVGSILSRKDDSKTETIVCEQLDLTHLRERNVEDLSGGELQRFAIAVVCIQRADIFMFDEPSSYLDVKQRLRAAVTIRSLISPDRYIIVVEHDLSVLDYLSDFICCLYGVPSAYGVVTMPFGVREGINIFLDGYVPTENLRFREISLVFKVAETANEEEIKRMCHYQYPHMKKNMGDFALEILEGEFTDSEIMVMLGENGTGKTTFIRMLAGRLKPD…	599	18	0.0300501
transcription activator BRG1	642080923	1019	117 kDa	MTTKKAILRIGSCYSNELEYLNSILQHAKDFKEYHRSITAKLQKATKAVATYHANTEREQKKENERIEKERMRRLMAEDEEGYRKLIDQKKDKRLAYLLQQTDEYVANLTDLVRAHKADQALKDKKKKKKKKKKPESGEGQPPALGPDGEPLDETSQMSDLPVKVIHVDSGKILTGLDAPRAGQLDTWLEMNPGYEVAPRSDSEDSGSEEEEEEEEEPQPSQAPTEEKKKIPDPDTEDVSEVDARYIIEGAKQDVDDEYNSAEAAFARGLQSYYAVAHAVTETVDKQSTLLVNGQLKHYQIKGLEWLVSLYNNNLNGILADEMGLGKTIQTIGLITYLMEHKRINGPFLIIVPLSTLSNWVYEFDKWAPTVVKVSYKVSSPFQPFFQGESACTCEYPLI…	1019	10	0.00981354
coiled-coil-helix-coiled-coil-helix domain-containing protein 6, mitochondrial isoform X2	642081210	76	8 kDa	MGSGQSATRKVSFGVDDEDRVRVLRGVKLSEDVLQRMRGAGPANQTADLKPPPPTSPKKESKLIYHLHVSVLLNSS	76	0	0
annexin A13	642082393	316	35 kDa	MGNCQPTIMPCEDFDVAADIKALSKACKGLGTDEQVIIDILTNRCAAQRMEIKQAYFDKYKNELVDVLKSELGGNFENAVVAMLDPPVVYAVKELRRAMKGAGTDEDTLVEILCTATNADIHMLKECYFQVHERDLESDIEGDTSGDVRNLLTALLQGTRDESYDVDEGLAEADATALFEAGEGCFGTDESTFNFILAKRNYLQLQATFKVYEQLSGTEILDAIENEVSGTLKGCYITLVRVAKNPQLYFARRLNEAMKGAGTDEDTLIRIVICRSEYDLETIKDMYLEKYDMSLKDAIKSECGGDFKRLLLAVCH	316	11	0.0348101
actin-related protein 3	642083179	392	44 kDa	MAGRLPACVVDCGTGYTKIGYAGNTEPQFIVPSCIAIKESAKVGDQAQRRMTKGVDDLDFYIGDEAIDKPNYATKWPIRHGIVDDWDLMERFMEQVIFKYLRAEPEDHYFLLTEPPLNTPENREYTAEIMFESFNVPGLYIAVQAVLALAASWTSRQLGERTLTGTVIDSGDGVTHVIPVAEGYVIGSCIKHIPIAGRDITYFTQQLLREREVGIPPEQSLETAKAIKERFSYVCPDLVKEFNKYDTDGSKWIKQYTGINSISKKEFTIDVGYERFLGPEIFFHPEFANPDFTQPISEVVDEVIQNCPIDVRRPLYKNIVLSGGSTMFRDFGRRLQRDLKRTVDGRLKLSEELSGGKLKPKPVDVQVITHHMQRYAVWFGGSMLASTVSSKT	392	6	0.0153061
desmoplakin isoform X1	642084770	1059	119 kDa	MRAELEGKRDVLVSMETELGKAVHWNGQVGGAFHRCDVDLSRYSEQVTQLSDRWRRLQSQIDFRLRDLEGYQGQLQQYTTTSSVLSEWIGTTRQKQDALQATKIDSITALDEHLNQQKALNSEIKVKRESVESVLRDTDACVNSIKDYELELASYSAGLETLLNIPMKRTMTQSPSTQLTEEATLLQTRYIELLTLSGDYYKYLGELHKNMEELKTSSLIQSTKTQYSEMVVERDALLLKLKQTDQDRAMSQKLEEELNRIKLSLESELRLKLRLQEENEKVKNDFLYWKGQYESKEGAVRQFDSVKEKLERERSSLETEIERLMRELREGEDRYKSRLLITQTQLSELTSVRDTLEADLRKLREQHNACAKHTQTDENGKKDLDPATLIFDKKPMTVK…	1059	12	0.0113314
40S ribosomal protein S2	642084834	282	30 kDa	MADNAGGERGGFRGGFGSGDRGRGRGRGRGRGRGRGRGARGGKSEDKEWVPVTKLGRLVKDMKIKSLEEIYLYSLPIKESEIIDFFLGSSLKDEVLKIMPVQKQTRAGQRTRFKAFVAIGDYNGHVGLGVKCSKEVATAIRGAIILAKLSIVPVRRGYWGNKIGKPHTVPCKVTGRCGSVLVRLIPAPRGTGIVSAPVPKKLLTMAGIDDCYTSARGCTATLGNFAKATFDAISKTYSYLTPDLWKETVFTKSPYQEFTDHLAKTHTRVSVQRTAAAVPASS	282	5	0.0177305
solute carrier family 25 member 40	642085836	287	32 kDa	MSGNSGKNPVPVDTNGITPFQQMLASCSGALLTSLFVTPLDVVKIRLQAQKSPFPKGKCFVYCNGLMDHTCVCTNGNSKAWYKAPGHFNGTLDAFIKIVRREGIKSLWSGLPPTLIMAVPATVIYFTCYDQLRAALRVRMGSHAEEAPLLAGALARVGSVTVISPLELIRTKMQSQRSSYRELSEVIHSAVRNEGWRSLWRGWGPTLLRDVPFSGRNNTMSITISLSGRNNTMSIFYENFVINVHKLQLIYSVCNPEFVRFWLNETDKSPSLQKSVFIHENVLTSKM	287	7	0.0243902
malate dehydrogenase, mitochondrial	642085888	338	35 kDa	MFSRIARPTLCIANRSLTTSSQNNAKVAVLGASGGIGQPLSLLLKNSPLVGELSLFDIAHTPGVAADLSHIETRAHVTGYMGPDQLNAALKGCDVVVIPAGVPRKPGMTRDDLFNTNATIVATLADAVARNCPEAMICIIANPVNSTIPITSEVMKKYGVYNPNRVFGVTTLDIVRANAFVAELKGLDPARVNVPVIGGHAGKTIIPLISQATPKVEFPADQLSALTARIQDAGTEVVKAKAGAGSATLSMAYAGARFTFSVLDAMNGKEGVVECAYVRSEETECKYFSTPLLLGKHGIEKNLGLGKLSAFEENLVADAIGELKGSIKKGEDFVANMK	338	6	0.0177515
bifunctional lysine-specific demethylase and histidyl-hydroxylase NO66	642086299	574	65 kDa	MLTSTALEPARQHEHSSPNTAKLLHSLSVASEKKKHVSAFELYQNALLESTPEVKPSPVQVIPKKKKRKENGIQTPKPIKKAKMKPMVKQVIKSSPREERLERLEEEVQCGEKSGQALEALLSDLAEVSNSRERASKLFQWLIQPIPSKSFFRDTWEKKPVLIKRQNPDYYKGLFSTTEFDRILRQDDVQYGVNLDVTSYTNDKRETHNPPGRALPFTVWEFYESGCSLRMLNPQAFSSTVWSVLSILQEQFGSMAGANVYLTPPGTQGFAPHYDDIEAFVVQLEGKKHWRVYNPRSEDEVLPVVSSLNFSQSEIGKPILEVVLEAGDLLYFPRGFIHQGNCLPDAHSLHITVSSYQRNSWGNLLAKVVPAALEMAMEEDVDFRRGLPVDYLTYMGVQN…	574	6	0.010453
EH domain-containing protein 1	642087111	390	44 kDa	MKYCQILSRYRNPPCRSTGYDFAAVLEWFAERVDRIILLFDAHKLDISDEFSEVIRALKNHEDKMRVVLNKADQINTQQLMRVYGALMWSLGKIINTPEVVRVYIGSFWAQPLLIPDNRKLFEAEEQDLFQDIQGLPRNAAIRKLNDLIKRARLAKVHAYIISSLKKEMPSVFGKENKKKELIANLGETYLKIEREHQISPGDFPKLKKMQELLAGHDFSKFSTMKPKLLEAVEDMLANDIARLMTLVRQEEAAMPSQAVHGGAFEGTMSGPFGHGYGEGAGEGIDELEWVVGRDKPSYDEIFYTLSPINGKVSGAAAKKEMVKSKLPNTVLGKIWKLADVDKDGYLDDEEFALANHLIKVKLEGHELPGKLPEHLVPPSKRHQEIDMGE	390	2	0.00512821
butyrophilin subfamily 2 member A2-like	642087514	511	56 kDa	MWLYILAVWGVSLSTATSEMFTCSVPEDPVSARLGHVATMPCWLTPSMNAEGLEVRWYRPKDFDNPVLHYRERKIQEASQQSQYVGRSSLGLREVTSEGLKGGDVTLKLVNVTLRDQGEYVCYVSSNQDYETASVFLNVTVMGTPPLLSAVRTDADSVNVSCVSHGWKPRPRLQWSDGRQTLKPEKLDYSSGAHGLVSAHSWVLSSSSSAPWVSCSLVLSEGEELEGRVDLRNVPAVPETSSGLKTAVIILALLLLLSVVFVGVLYKKTGNKSTRVITGDIVDIETMRQPEDLVDLETMRQAGVDVTLDPKTAPPYLTVGSTGKIVRDSKDNPCPPGEHACILGTRGFTSGSNAYWEVGLHNEQVGGKKSWWVGLASGPVKIHGDVPATPSNGFWFLSS…	511	8	0.0156556
ATP synthase coupling factor 6, mitochondrial-like isoform X5	642088420	351	36 kDa	MATSLLRIVRLGSTKCVQAERWSAPAAAALCTKAGGPKKPKKSSSGKKSQGKTYFDLEKLKICGVSKERNDTSCSSRTCRRPKASPAAAEAVPAPAAAEAVPAPAAVEATPVVDTVAPATEAIVESAALVAKATPVVEAAASVAEDAPVAAEAAPIFEASSAADTPVKAVPEAAAPAEAVAEAAPVEAAPVEAAPVEAAPVEAIAEVLVESATIEAAAEALVEVVAEVVTVAAPIEAAAEALIEAVAEVVAEAAQVESAAEELIAEPPAEAERIEAPEVQLDPIQKLFLDSIREYSSKSVASGGLVDAGPAYEKNLAEELTKLQRLYGGGDITAFPEFKFTEPKLEEVAPK	351	5	0.014245
10 kDa heat shock protein, mitochondrial isoform X2	642089386	167	19 kDa	MAFCIRRLWNILERKLSGNRKVRTFEDTHARPSSRYFLTWSFRFSLLDPHSRRNRGSTSRGFNDYHLKMAFRKFLPMFDRVLVERLAAETMSKGGIMLPEKAQGKVLQATVVAVGPGSTNQKGYLTPMSVKIGEKVLLPEYGGTKVHLEDKEYFLFRDADILGKYVE	167	1	0.00598802
DNA-directed RNA polymerases I, II, and III subunit RPABC3	642089825	150	17 kDa	MAGILFEDIFDVKDIDPDGMKFDRVSRLHCESESFKMDLILDVNIQIYPVDLGDKFRLVIASTLYEDGTPDDGEYNPQDDRPSRADQFDYVMYGKVYKIEGDETSTEAATRLSAYVSYGGLLMRLQGDANNLHGFEVDSRVYLLMKKLAF	150	1	0.00666667
long-chain-fatty-acid--CoA ligase 1 isoform X1	642091397	697	78 kDa	MQAQQLLNQLRFPELDEVRQYLRSLSTHTLVGVGAFAALTTYWYTTRPKALKPPCDLKMQSVEVPGGEYARRSALLDSDKHLTHLYNDAKTMYEFFLRGARVSNNGPCLGARQPSQSYEWLSYSEVAEKAENLGSALLHRGHTKTKDQFIGIFAQNRPEWTIAELACYTFSLVAVPLYDTLGTEAIAYVIDKANISSILCDVPEKARLVLECVSGREHSVRTIILMEPFDDELVAKGKDCGIDILSLSQVEVRGETLTYNWVPPSPEDMAVVCFTSGTTGNPKGAMLTHGNVASNCSAFIKVIEDHLILDHHDVHISYLPLAHMFERVVEGVILVHGGRIGFFQGDIRLLMDDLTTLRPTVFPVVPRLLNRMFDKIYGQANTSLKRWVLDFAFKRKEAE…	697	15	0.0215208
ras-related protein Rab-34 isoform X1	642091587	266	30 kDa	MSVRVPSMSVLPPVRRDRIIAQLPQFYSKKAAVHTKDEFNSKVKTACQEQRTGTVGFKIAKVIVVGDLAVGKTCLINRFCKDAFDKNYKATIGVDFEMERFEVLGVPFSLQLWDTAGQERFKCIASTYYRGAQTIVIVFDVNDVASLGHARQWLEDALKENDPTNVQLFLVGTKKDLSSPAQYSQIEQDAIELAEEIKAEYWALSSLTGENVREFFFRIASLAFEANVLAELEKSGSRHIGDVIKINSNSNNVYATSKKKQSNCCQ	266	6	0.0225564
transitional endoplasmic reticulum ATPase	642094263	761	85 kDa	MSTAAPIRGCVRKFTLAIYSHFRALVCVPERRITDEFTNTLSARWLSRVNLRTHPELGVGVALTEEKHTRRGRNQVLFVGHTKRSTMASGGESKNDDLSTAILKQKTRPNRLVVDESLNEDNSVVSLSQAKMDELQLFRGDTVLMKGKKRRETVCIVLSDDTCSDEKVRMNRVVRNNLRVRLGDVISIQPCPDVKYGKRIHVLPIDDTVEGITGNLFEVYLKPYFLEAYRPIRKGDIFLVRGGMRAVEFKVVETDPNPYCIVAPDTVIHCEGEPIKREDEEESLNEVGYDDIGGVRKQLAQIKEMVELPLRHPALFKAIGVKPPRGILLYGPPGTGKTLIARAVANETGAFFFLINGPEIMSKLAGESESNLRKAFEEAEKNAPAIIFIDELDAIAPKR…	761	12	0.0157687
dihydroorotate dehydrogenase (quinone), mitochondrial	642094514	406	44 kDa	MAGQLKRLKDAVKIIGSGSVLFVSYLTAVGDERFYTNQLMPLLQRIVGAETAHVMAVRLIGLGLVPLNRYQDPASLEVNVMGRKFKNPIGIAAGFDKHGEAVDGLYRLGFGFVEVGTITPKPQEGNPKPRVFRLTTDQAVINRYGFNSCGLAAARERLKAREGTQVELTKAGLPLGINLGKNKLSQDAAADYLEGVRTLGPLADYLVVNVSSPNTPGLRDLQGKGELRQLLYKVLKERDALQGGSRPPVLVKIAPDLTAQDKQDIADVVTELGVDGLLVSNTTVSRPETLQDPQSKEVGGLSGQPIKDLSTRTVREMYSLTKGKVPIIGVGGVASGQDAMDKICAGASLVQLYTSLTYQGPPVVTKIKRELEQLLKEQGFANISDAVGADHRGAEGKFQ…	406	2	0.00492611
ATPase, H+ transporting, lysosomal accessory protein 2	642095030	354	39 kDa	METLFSVAFIFCSAFTAGVQGDSLTILQAPEYVSFQKGDWPISGEKIPDMVALTMGFSVQEDLSWPGLRAGQLFQRPRANVLVVVRGVDSLALPQNVASYPLENPVPFNLDSVAETVHSLFAEDTPVVLQLAPSEERLYMLGKANAVFEDLPVTLQQIRSRLSQDGSVLASLPLNSLNRNAEADLLFLSEVQVLHDITALLQRHRHLAQDHSPDLYSLELSGLEELGRRYGQDSPQYRDATAILANVLQKFGEDVFGLYGDSAVVEVVTVKSFEAPLTRKSRSILESKQISNPGSPYNLAYKYNFNYAVIFNIVLWLMIILALAVIVISYNLWNMDPGYDSIIYRMTNQKIRLD	354	1	0.00282486
28S ribosomal protein S2, mitochondrial	642096256	273	30 kDa	MAAGVLTKGLCGFRQPRIVAAGYSCSGPLYATATAVKTLPLQTDSTAVTDKIQNLPLETPDFFHLSELFSLKDLFDARVHLGHKKGCRHRLMEPYLFGSRLGQDIIDLDQTMAHLQSALNFTAHIAYRGGIILFVSRRRQFGHVVESTAGDCGEYAHTRYWQGGLLTNAPIQYGSGVRLPDLIVFLSTLNNVFQQHVGVRDAAKMNIPTVGVVDSNCNPSLVTYPVPGNDDTPAAMELYCRLFKMTINRAKDKRRQMELLQGLSPPGLTQGSS	273	6	0.021978
cytoplasmic dynein 1 heavy chain 1	642098066	4648	534 kDa	MSDGGGGDDSSGTMEVSTAVQTVADAAVLQKHIRKLVPLLLEDGGDAPASLETALEEKSSIEQMRKFLSDPQIHTILVERSTLKEDVGDEGEEEKECISYNINIDIHYGLNLAFIKRTGVIDADKPISTQVRVLTLSEDSPYETLHSFISNAVAPFFKSYIRESGKADRDGDKMAPSVEKKIAELEMGLLHLQQNIEIPEISLIIHPIILNIAKACYERGEKPKVTDFGDKVEDPTFLNQLQSGVNRWIREIQKVTKLDRDPASGTALQEISFWLNLERALNRIQEKRESPEVLLTLDILKHGKRFHATVSFDTDTGLKQAVETVNDYNPLMKDFPLNDLLSATELDKIRQALVAIFTHLRKIRNTKYPIQRALRLVEAISRDLSSQLLKVLGTRKLMH…	4648	48	0.010327
plectin isoform X14	642100531	5269	599 kDa	MWMCHTQTRSPSSHTSPPCMPHVPDVQDEVKANELELRWQEYYELVTLLLQWIRHHIIVFEERKFPTSYEEIEVLWRQFLKQSCLQRKQTRIDPNTSNTSFEGAVQVGNVKVPPGYQPIDVEKEWGRLHVAILEREHCTFIFEMMLNSVTDVFVRCSSEEKFLIWELCHVVFLLYFSVSKLLSGTVTMWIITSLVDVRRHCEIKIAGQPHDDSLKDPKLMSGSKSSKTVYRLHERLVNLCSEYNLSLKSGVTTTQIPMSQMQTLQQVPMRVRPELDEVTLCYIQDLLAWVEENQRWVDQGEWGSDLHTVESRLGSHRGLHQSVEEFHAKINKAKADESQLSPVSKCAYRDYLLNLELHYSKLLSSSKARLCSLDELHAFVTAATKELMWLNEKEEEEVN…	5269	56	0.0106282
citrate synthase, mitochondrial precursor	642101042	470	52 kDa	MSLLSAYRFTPKLLNSTKSTACLFAASRNATTSTNLRDVLLDLVPKEQSRIKNFKTQYGKTNIGSITVDMIYGGMRGMKGLVYETSVLDADEGIRFRGYSIPECQQLLPKAPGGAEPLPEGLFWLLVTGQVPTEEQVNWLSKEWAKRAALPSHVVTMLDNFPTNLHPMSQFSAAITALNSESSFARAYSEGVNKAMYWEFVYEDSMDLIAKLPCVAAKIYRNLYREGSSIGAIDSSLDWSHNFTNMLGYSDATFTELMRLYLTIHSDHEGGNVSAHTSHLVGSALSDPYLSFSAAMNGLAGPLHGLANQEVLVWLTALQKEMGGEVSDEAMRDYIWNTLKSGRVVPGYGHAVLRRTDPRYTCQQEFAFKHLPDDPMFKLVHQLYKIVPNVLLEQGKAKN…	470	4	0.00851064
exocyst complex component 3	642101059	751	87 kDa	MEETNREAVATAVQRVAGMLQRSDQLDKVEQYRRREARKKASVEARLKAAIQSQLDGVRTGLSQLHNALGDVKDIQNSLADVSKDWRQSINTIENLKDVKDAVVQHSQLASAVENLKNIFSVPEIVADTQVLIEQAELLEAHRKLMDLECSRDDLMYEQYRMDSKNTHDMNLIRNYFGEVQGLSDDLAKQLWMVLQRAMGTVRRDPTMLVSVVRIIEREEKIDRRMLDRKKQTGFIPPGRPKSWKEKMFEVLEGTVTTRIEGSQSVTREADKMWMVRLLEITRKYVLDDLIVVKNLMVQCFPPHYNTFDRFFKLYHNAVSMRVQELAAEDLEANEIVSLLTWVLNTYKSEEMMGHPELLTEYDINLMDPLLPQEVVDELLSKYLQTFTSNITGWLRKAL…	751	8	0.0106525
SLAM family member 7 precursor	642101117	335	37 kDa	MSKLKLIRLCFWFYLVRTVVSEEAVPKPTITSSCNPDKTSCTLTCEGDTTDAEPVTYSWEEGERVSKVLDKQLSVSKSTNGIKYTCKLSNAVSSNVSEPVGEVFGPEHSSIGAVVALVVVAIVAFAVIIGCLVWKKKTEYPQDTWIDFLRMYCGGIYGRICAKGTNGVQPEQGNNADKAEKGQGDEDLYLKVGGELVLKPDKSTVPDSITSILWKHGKNYVAEWENEFDRLNIYGVFEGRTTLNQTTGELRISGLKKTDSGVYSVEFNRKLLDKTYKISVSRGDDETTMNGSAAPGGDLDATEKGEANGEGSVLLKEDTVKYDNGKGETEENSTL	335	8	0.0238806
translocon-associated protein subunit alpha precursor	642101382	296	33 kDa	MVQFLPKVLLLVLLAFPAMIIMKGPLVAAQDATEDEEAADEDAVDDVDVNTEDEDDEAEVEDDENTDLTEEKEEEEAVGGEVNASPNADTTILFVKGDDFPANDIVKFLMGFTNKGSDNFVVESLDASFRYPQDFQFYIQNFTALQLGIVVPAGRQATFEYSFIPAEPMGGRPFGLVINLNYKDSNGNTFQDAVFNQTVTITEREDGLDGETIFMYVFLSGLGLLVVVGLHQLLESRKRRRPAAKVEMGTSSHNDVDMSWIPQETLNQIMQSRRDKASPKRSPRKRTQKRTAGSDE	296	0	0
coiled-coil-helix-coiled-coil-helix domain containing 6b	642101439	152	17 kDa	MGGSESTRRKVSFGLDEEEKVTVIHGVKASNLSGELMQRMRDSQGTDGVNPPPPQPGSHKPAPGPRPGPTAAEAQEELRRKFEREQAQVQEQLFRLAQREKEAAAATAGRKGETHDGLNPAVLREKGKTHEELMKAKQLHSVIIETNDISMS	152	0	0
galactoside-binding soluble lectin 9	642102003	345	39 kDa	MACQQPFFNPRLPFTGCIQGALHEGKTITVTGRVLPGCQRFYVNLQCGSRGNPDIALHFNPRYDESKDVVICNTMQHSKWGPEEREYPASMTRGANFTLMFLVNRDSYSLIVNGAHFMEYLHRLSFSRVDTITVDGGVEIQSIAFSNPAVTSPPPQPGYPVHPHSGQRNRTKSHQSKSCPKTPPQWCNATQAFSAAFCAPGLFQTPPPYTPQPSFVVPYKNIMVGGLYPGRNIIVQGVVNHNADRFYVNLRFNSGVALHFNPRFDENTVVRNSLLKEQWGPEERKGGMPFYRGQPFTMTITCDTKCYRVMVNGVQMFSYNHRHFLLQQIDILEVEGDVSLSSVVF	345	10	0.0289855
peptidyl-prolyl cis-trans isomerase A	642102250	164	17 kDa	MPNPRVFFDITIGDSAAGRIEIELFADVVPKTAENFRVLCTGDKGFGYKGSSFHRIIPGFMCQGGDFTNHNGTGGKSIYGNKFPDENFTLKHTGMGCLSMANAGPNTNGSQFFICTANTDWLNGKHVVFGKVVEGLSIVANMEKKGSSSGKCSAKVVIADCGEL	164	6	0.0365854
hexokinase-1	642102842	479	53 kDa	MIAAQLLAYFFTELKDDKVKKIDKYLYAMRFSDETLLDIMKRFRMELGNGLGQDTNPTATVKMLPTFVRSIPDGSDSILMLCFPEKGDFLALDLGGTNFRVLLVKIRSGKRRTVEMHNKIYAIPMEVMQGTGEELFDHIVQCISDFLDYMGMKNTRLPLGFTFSFPCRQTSLDAGILVTWTKGFKATDCEGENVVGLLREGIKRREEFDLDVVAVVNDTVGTMMTCAYEEATCEVGLIAGTGSNACYMEEMRNIETVEGDVGRMCVNMEWGAFGDNGCLDDIRTEYDRAVDDLSLNPGKQRYEKMCSGMYLGEIVRNILIDLTKRGFLFRGQISETLKTRGIFETKFLSQIESDRLALLQVRSILQQLGLDSTCDDSIIVKEVCGTVSHRAAQLCGAGM…	479	15	0.0313152
filamin-C isoform X3	642103630	2552	276 kDa	MPATEKDLAEDAPWKKIQQNTFTRWCNEHLKCINKSITDLQKDVGDGLKLIGLLEVLSQKKMYRKHHNRPNLRQMKLENVSVALEFLDGEHIKLVSIDSKAIVDGNLKLILGLIWTLILHYSISMPMWEDEDDEEAKELTPKQRLLGWIRNKVPELPINNFHRDWRDGKALGALVDNCAPGLCPDWQAWDPNQPVENARGAMQQADDWLGVPQVINPEEIVDPEVDEQSMMTYLSQFPKSKLRPGAPLKPKGVQLYPKKAKSYGPGIEANGNMILKPAVFTVETLEAGQAEVLVYVIDPEGHTEEAKVVFNNDKNRTHTVIYIPKVEGAHKVKVLFAGQDVDKSPYTVNVAKAIGDPNKVQARGPGLDATGNMANKPTYFDIYTAGAGNGDVSVVIVDT…	2552	45	0.0176332
glutathione reductase, mitochondrial isoform X1	642104490	502	54 kDa	MQWVKICRQSLSSTVNTTLTVALSRHKLIRRSMASDATTRFDFLVIGGGSGGLAGARRAAELGATAAVVESHKLGGTCVNVGCVPKKVMWNAAVHAEYLHDHSDYGFDGGHVHFSWETIKTKRDAYVSRLNNIYRNNLDKAKIETIQGHARFIDGPDPTVEVNGKKYTAPHILIATGGFPSVLSDSDVPGASLGITSDGFFELESLPKRSVIVGAGYIAVEMAGILSTLGSKTSIICRQTGVLRNFDTLISSNCTKELQNSGIELWKNTQVKLVSKTGNGLLEVTLVTKDPEKKNEEEKIGTIQEVDCLLWAIGREPNTAGLNLSQMGVDIDERGFIVVDEFQNTTRQGIYAVGDVCGKALLTPVAIAAGRKLAHRLFDGKEDAKVDFSNIPTVVFSHP…	502	10	0.0199203
syntaxin-binding protein 3	642105035	598	69 kDa	MATVSEHGLKRVVWQRIKETIIEDCKKSEIWKILILDHFTTKLLSSCCKMSDLMQEGITIVEDLYKSREPVLEMKAIYFMTPTAKCVDAFIGDFKLKPKYKAAYVYFTDYCSDELFNKMKLYCGKYIRVCKELNISFLPQESQVFTCDNPGAFRSIYSPHCSQDKVKTLETLAAQIVTLCATLDENPGVRYKKETVLENTTLDNAKQLAALVDYKLTKHYDMDDNSKKKGKTQAQLLIVERGFDPVTPILHELTYQAMAYDLVPIKNDTYKYKSKDGSEKEALLNEDDQLWARLRHMHIAEVSEQIPKLVKEISANKKQPDGKITISGLSQLMKKMPHFRKQVAQKTVHLNLTEDCMNHFQKNVEKLCKAEQDLAVGSDVEGVKVKDPMRTLLPVLLHP…	598	14	0.0234114
integrin beta-1 precursor	642105095	800	89 kDa	MDVKLLSIATLLGILCFCSAQQEGSDCIKANAQSCGECIQVAEKCGWCTDADFLKQGESKSARCDELKSLITKGCSKAKIENPRGSISIDKDKPVTNRKKEVAEKLKPDQITQIQPQKLSLNLRSGEAQTFKLKFKRAEDYPIDLYYLMDLSFSMKDDLENVKNLGTDLMREMQEITSDFRIGFGSFVEKTVMPYISTTPARLLNPCTSNENCTSPFSYKNVLKLTENGQQFNSLVSKQQISGNLDSPEGGFDAIMQVAVCGDAIGWRNVTRLLVFSTDAGFHFAGDGKLGGIVLPNDGKCHLENNMYTMSHYYDYPSIAHLVQKLSDNNIQTIFAVTEEFQPVYKELKNLIPKSAVGTLSSNSSNVIKLIIDSYNSLSSEVILENNKVPEGVSIKYKS…	800	58	0.0725
ras-related protein Rab-18-B	642106333	205	23 kDa	MEDDVLTTLKILIIGESGVGKSSLLLRFTDDTFDPELAATIGVDFKVKTISVDGNKAKLAIWDTAGQERFRTLTPSYYRGAQGVILVYDVTRRDTFTKLDNWLNELETYCTRNDLVKMLVGNKIDKENHELDRNEGLKFARKHSMLFIEASAKTRDGVQCAFEELVEKIIQTPGLWESETQGRGVQLGRQDQAAGGGCGGYCSLV	205	4	0.0195122
superoxide dismutase	642107611	226	25 kDa	MSMLSRVGQVRRCAATVTPVLGMVAARWKHSLPDLTYDYGALEPHINAEIMQLHHSKHHATYVNNLNVTEEKYQEALAKGDVTAQVSLQPALRFNGGGHINHTIFWTNLSPNGGGEPQGELAAAINRDFGSFQALKDKMSAATVAVQGSGWGWLGFDKESGKLRITACPNQDPLQGTTGLVPLLGIDVWEHAYYLQYKNVRPDYVKAIWNVINWENVSERLQAAKK	226	2	0.00884956
atlastin-3 isoform X1	642108626	511	58 kDa	MGSEPGPVQIVTVCKKDHSFALDTEALGRVLLAPEVRDKHVVVLSVAGAFRKGKSFILDFMLRYMYRKKHGEEWLGQEDEPLTGFTWRGGSEPETTGIQLWSEVFLVEKSDGMEVAVLLMDTQGAFDNQSTVKDCATIFALSTMTSSIQIYNLSQNIQEDDLQQLQLFTEYGRLAMDEIFLKPFQSLMFLIRDWSFPYEYKYGLKGGSEFLDKRLQVKETQHEELQTVREHIHSCFTSINCFLLPHPGLKVATSPAFKGQLSDVAPEFKEELRNLIPTLLHPDNLAEKEINGNKVTCRGLLEFFKAYIKIYQGEDLPHPKSMLLATAEANNLAAVAAAKDQYYKNMEKVCGGDLPYVAPASLEEKHHFFLQESLHVFSSTKKMGGQEFCDRYQDQLEAE…	511	10	0.0195695
alpha-enolase	642108706	416	45 kDa	MSQYFYLCHCSPSPRAAVPSGASTGIYEALELRDNDKSRYLGKGVSQAVDHINSTLAPALVGQEVSVVEQEKIDQIMLDMDGTENKSKFGANAILGISLAVCKAGAAEKGVPLYRHIADLAGNPEVILPVPAFNVINGGSHAGNKLAMQEFMILPVGASTFKEAMRIGAEVYHNLKNVIKKKYGQDATNVGDEGGFAPNILENKEALELIKEAISKAGYTEEVVIGMDVAASEFYRDGKYDLDFKSPDDPERYITPDELADLYKSFCKDYPVVSIEDPFDQDDWEAWSNFTGSTEIQVVGDDLTVTNPKRITKAVEDKACNCLLLKVNQIGSVTESLAACKMAQSSGWGVMVSHRSGETEDTFIADLVVGLCTGQIKTGAPCRSERLAKYNQILRIEEE…	416	9	0.0216346
NADH-ubiquinone oxidoreductase 75 kDa subunit, mitochondrial	642109561	755	82 kDa	MQYILNSQLPLAILPVHIFVFSMLRLPAVSRALGVAHSTGSVAITKNVHNAATAAASNLVEVFVDGKPLMVEPGTTVLQACEKVGVQIPRFCYHERLSVAGNCRMCLVEIEKAPKPVAACAMPVMKGWNILTDSDKTRKAREGVMEFLLANHPLDCPICDQGGECDLQDQSMQFGSDRSHFLESKRAVEDKNIGPLIKTIMTRCIQCTRCVRFASEIAGVEDLGTTGRGNDLQIGTYVEKMFMSELSGNVIDICPVGALTSKPYAFTSRPWETRKTESIDVLDAVGSNIVVSTRGGEVMRILPRLHEDINEEWISDKTRFAYDGLKRQRLTQPMVKDASGQLVATSWEDVLTRVAGVLQGAQGTSVAAIVGGMVDAEALIALKDMLNRLNSDSLCTEEI…	755	17	0.0225166
6-phosphogluconate dehydrogenase, decarboxylating isoform 1	642109711	483	53 kDa	MAEADIALIGLAVMGQNIILNMNDHGFVVCAYNRTVSKVHDFLANEAKGTKIIGAESLEDMVAKLKKPRRIVMLVKAGQAVDDFIDKLVPLLEAGDIIIDGGNSEYRDTTRRCKSLKEKNLLFVGSGVSGGEEGARYGPSLMPGGHKEAWPHIKEIFQSIAAKVGTGEPCCDWVGDEGAGHFVKMVHNGIEYGDMQLICEAYHLMKDVLGMDHDVMAQAFEDWNKTELDSFLIEITAGILKFRDTDGTHLLPKIRDAAGQKGTGKWTAISALEYGTPVTLIGEAVFARCLSALKDERVEASRSLAGPQGAKFNGDKASFLEDIRKALYASKIISYAQGFMLLRQAAKEFGWSLNYGAIALMWRGGCIIRSVFLGKIKEAFDRDAELQNLLLDTFFSNAV…	483	9	0.0186335
glycine dehydrogenase (decarboxylating), mitochondrial	642110671	913	101 kDa	MQSCAKSWGILFAKCVNPHAPCRHIHGKSRIFGKQQNRIQTLNNACVTVRGLRTSAVYAASRQIDRILPRHDDFAERHIGPGERDKREMLDVLGLESIAQLIEDTVPESIRIQRSMKMDDPLCENEVLERLQKIASKNKVWRSYIGMGYYNCSVPPVIQRNLLENSGWVTQYTPYQPEVAQGRLESLLNYQTMICDITGMAVANASLLDEATAAAEAMQLCHRQNKRRTFYIDPRCHPQTIAVVQTRANYIGVKTMLKLPHEMDFSGKDVSGVLFQYPDTDGRVEDLTALVDRAHKGGALACCATDLLALCVLRPPGEFGVDIALGSSQRFGVPLCYGGPHAAFFSVKENLVRMMPGRMVGVTRDAAGKEVYRLALQTREQHIRRDKATSNICTAQALL…	913	26	0.0284775
ras-related protein Rab-2A	642111189	245	27 kDa	MRTLQEHSFTIFIVSSSEATVNGRGRLTQDPVAMAYAYLFKYIIIGDTGVGKSCLLLQFTDKRFQPVHDLTIGVEFGARMITIDGKQIKLQIWDTAGQESFRSITRSYYRGAAGALLVYDITRRDTFNHLTTWLEDARQHSNSNMVIMLIGNKSDLESRREVKKEEGEAFAREHGLIFMETSAKTASNVEEAFINTAKEIYEKIQEGVFDINNEANGIKIGPQHATTNSTLSGSQGGQQAGGGCC	245	3	0.0122449
DNA replication licensing factor MCM5	642111399	736	82 kDa	MSGFDDPGVYYSDSFGGGDGPGDEGGVKRSQIKKRFREFLRQFRVGTDRTGFTYKYRDDLKRHYTLGEYWVEVEMEDLASFDEDLSDCLYKLPSENLPLLEEAAQEVADEVTRPRPLGEETVQEIQVMLKSDAHPASIRNLKSEQVSRLVKVPGIVISATAVRAKATRVCLQCRGCRSVISNIFMPPGLQGYALPRKCNTEQAGRVRCPIDPYFIIPDRCVCVDFQTLRLQESPDAVPHGEMPRHLQLYCDRYLCDRVVPGNRVTIMGIYSIKKVAQAKGKGRDKSAGVGIRSSYLRVVGIQQDTEGAGRGATGSVSPQEEEELRALASSPDVYGSLARSLAPSIYGSDDLKKAIACLLFGGSRKRLPDGLTRRGDINLLMLGDPGTAKSQLLKFVERC…	736	15	0.0203804
H2A histone family, member Y-like	642111879	371	40 kDa	MSARGGKKKSTKLSRSARAGVIFPVGRMMRYLRTGTHKYRIGMGAPVYMAAVIEYLAAEILELAGNAARDNKKGRITPRHIKLAVANDEELNQLLRGVTISNGGVLPRIHPELLSKKRGSRVKVDTQVTVPEKRAERVKSIKKPTTKKGKGKPGRKPRKSTENDKEAVVANSTVEDGPGDGFTILSAKSLFLGQKLSLTESEIGKIGTIKVEGIINPTNAEMDLKEGVGNALEKAGGRDFLEAVKELRKAQGPLEVASVAVSQASGMPARFVIHCNIPQWGSEKCEDQLEKTVKACLSAAEEKKLKSVAFPSLPAGRNGFPKQTAAQLILKAISNHFVSATTSSLKNIYFVLFDSESIGIYLQEMAKLDAK	371	3	0.00808625
histone H2A.V	642112016	184	20 kDa	MHVVYFRIVLVKARISIGHRPFARSPGYSIVKGFIFSLGLEPKLFPISSVPQQNNEMAGGKAGKDSGKAKAKAVSRSQRAGLQFPVGRIHRHLKTRTTSHGRVGATAAVYSAAILEYLTAEVLELAGNASKDLKVKRITPRHLQLAIRGDEELDSLIKATIAGGGVIPHIHKSLIGKKGQQKTA	184	0	0
erythrocyte band 7 integral membrane protein	642112963	286	32 kDa	MEEDGKETISIRESKRRERQAALESPDIGIGLCGWIIVGLSILLMLATLPLSIWMCIKIVKEYERAIIFRLGRILRGRAKGPGLFFILPCTDNFINVDMRTITFDIPPQEVLTKDSVTVSVDGVVYYRVQNATLAVANITNADAATRLLAQTTLRNVLGTKNLAEILSDREEIAHSMQTTLDDATDDWGIKVERVEIKDVKLPQQLQRAMAAEAEASREARAKVIAAEGEMNASRALKEASLVIAESPSGLQLRYLQTLNTIAAEKNSTIIFPLPMDMMQAFMKRD	286	3	0.0104895
guanine nucleotide-binding protein G(i) subunit alpha-2	642114112	352	40 kDa	MMIKCLVSAAVEREGYNTTASSEVNTQAVLLTQELLGAGESGKSTIVKQMKIIHEDGYSEEECKQYRAVVYSNTIQSIMAIIKAMANLKIDYEEAARADDARQLFALSGAAEEQGILPDDLSNAMQRLWGDGGVQGCFTRAREYQLNDSAAYYLNDLERIAKADYIPTQQDVLRTRVKTTGIVETHFTFKDLHFKMFDVGGQRSERKKWIHCFEGVTAIIFCVAMSAYDLVLAEDEEMNRMHESMKLFDSICNNKWFTETSIILFLNKKDLFEKKITHSPLTICFPEYSGPNKFEEAQAYIQTKFEDLNKKKDTKEIYSHFTQATDTKNVQFVFDAVTDVIIKNNLKDCGLF	352	8	0.0227273
fer-1-like protein 4 isoform X1	642116045	809	93 kDa	MYICFRFLLTSLNKFISNQLYHPQSPLNKLKKNKVEELEEETPEKEELDWWSKYYASLEELRNQVQYIVSVTKQCFYTKGGLDVGTLEAEEEDAVIVEMEPPPKPKRKKIATLQLYKSELENEFSEFMDWLHTFPIYKGKANEEEDEDEEERSMGKYKGSFLIYPISPEDEHAERQITKGIPQNTPIKVLVRVYVVKATNLAPTDPNGKADPYVVVKVGGQSMDNKDSYIPKQLNPVFGEVFELTVSFPLETEITLMVFDHNLVGSDDLIGETRIDLENRFYSHHHAGCGIALYYDKDGYNKWRDAKKPSAILAELCRNNAIPSPEYRELEIKVLNKIFKVPDEAFPEELLKKNKKTEEDLHELDEHKALSVLHRWGEMREFCEGACPLVPEHVEVRSL…	809	10	0.0123609
cysteine desulfurase, mitochondrial	642116050	467	52 kDa	MMRKTVTTKLLGSLRGFPSHRVNYAVNAVARELIKSRELENDELRPLYMDFQATTPMDPRVLDAMLPYQVNYYGNPHSRTHAYGWESESAMEKARKQVADLIAADPREIVFTSGATESNNMSIKGVARFYKSKKKHVITTQTEHKCVLDSCRVLEAEGFDITYLPVKTNGLVDLQASSILLEGTIRQDTSLVSVMTVNNEIGVRQPVEDIGRICRSRNVFFHTDAAQAVGKIPINVSDWKVDLMSISGHKIYGPKGVGALYVRRRPRVRMEPLQNGGGQERGLRSGTVPTPLAVGLGAACDIAQQELEYDHSRVSMLANRLVRKIMSEIPDVVMNGDPEQRYPGCINLSFAYVEGESLLMALKDVALSSGSTSFASACSKEKKDSANPCACTSASLEPS…	467	9	0.0192719
aldehyde dehydrogenase family 9 member A1-B isoform X2	642116605	517	56 kDa	MLQKLVLFRFLRPAALLSAALRCASSGTVDVKVPLNFWCGDRVKIKDVSTTEPVYEPATGRVLCELELCGSVEVNQAVQAAQSAYQAWSRMSGMERAHIMIEAARIIENRREDIAEIEVVNNGKSITEARMDVDSARLCIEYYAGVASTLAGQHIQLPGGSFAYTRREPLGVCVGIGAWNYPFQIAAWKSAPALACGNSMVFKPSPVTPVTAVMLAEIYAKAGAPEGLFNIVQGGQETGNLLCHHPDVAKVSFTGSVPTGKKIMEMCSKGVKQVTLELGGKSPLLIFEDSDLGNAVKGALMANFLSQGQVCSNGTRVFVQRQMLPEFLEEVVRRTKDIEIGDPLLESTRMGALVSRPHLDRVLGYVEQARKEGAKVLCGGEPFVPLDPKLRGGYYMTPC…	517	15	0.0290135
ATP-dependent zinc metalloprotease YME1L1-like isoform X1	642116806	713	79 kDa	MFSFSTTFQPQVTSQLIGQLINALHSLKNSASSKATASVQGLQKDVTPEQDPLLTEPAVNLRDLGLSDLRVGQLDELLNRLLPSLGSEDGPATSRWRTSHVSAESFFHNKHGLSNAKLGVFGLPMFHRPNQSPLQVVCSELQYWPVRVQNRGFKTLRKSRRVQSGYVGPAEPEGYTTTFMKGLLLRPDKAPEAESLDQVVKLKNLPGDQQDAFKSGFTEDSLRRTRLILLVLLLVGIYGLSRTPFLSGKGSFSDAVRFRTTSGLDSQVDPVQVKSVTFEHVKGAEEAKNELQDVVEFLRNPQKFTVLGGKLPKGILLIGPPGTGKTLLARAVAGEADVPFFYASGSEFDEMFVGVGASRIRNLFKEAKANAPCVIFIDELDSVGGKRIESPMHPYSRQT…	713	2	0.00280505
isocitrate dehydrogenase	642118720	393	43 kDa	MAASSAVLSMSKIIKPIWGGRLATTAKVFGATVSSRREKSTVGQIIPPPAKYGGRHTVTLIPGDGIGPELLNHVRELFRFSCVPVDFEVVNVCSATEDDINNAITAIRRNGVALKGNIETLHTLPASHKSRNNLLRTTLDLYANVMHCKSLPGVQTRHNNIDIMIIRENTEGEYSSLEHESVSGVVECLKIITRTNSLRIAEYAFKLAREKGRKRVTAVHKANIMKLGDGLFLQCCREVAAGYPDIAFDAMIVDNTTMQLVSKPQQFDVMVMPNLYGNVVSNVCAGLVGGPGLVPGANYGRDYAVFETATRNTGKSIADRNIANPTAMLLASCMMLDHLKLHDYATMIRNAVLTTMNETQLHTADIGGQGTTSEVVQAIMRNIQSKGPLTSEL	393	8	0.0203562
centrosome-associated protein 350 isoform X6	642119460	2965	329 kDa	MLLLNNTDPKANKRELSAAWKSLNQTKAALQHIENHLEASPGSGVLLDSVMDTKKSSGGATRKVSHRDGRRTEDCSQAGGTSKSRRRSHRSPDKSSRSPLRNTTQDSNVHRNNCVEFKEPLTSYREATPTPPLTSSQLEAQSLQSEYATPPPPDSCLSQLVYQSDTRDQQTHGDLDSTHSSALDSTVVRYLNHCPTLEALRTPGHTAAARDANKEGGPEHRPKAHTLEGPAPPPAETVSSSPGSASQRLENLRRRKPDDKLEKLKETIRRQREHLEAADRDRLLEQPVGISGAVETTTVPTAKIRKVAAAPPAPIYKGFNRSETKICTPDGKVWREIYRDLSRQLSESTKPKQRPTEKAKERKPSKSVRKIHKSASVPHPETKLVISTTSWREGQKLVK…	2965	24	0.00809444
CD81 antigen	642120491	227	25 kDa	MLFFFNFIFWLAGGVVLGVALWLRHDGHTSSLLELKFDGHQAPTTFLNSVHILIAVGAVMMVVGFLGCYGAIQESQCLLGTFFACLVILFACEVAAGIFGFMHKDSISKELITFYDNVYENSVATTLTDQDKKQAATAVLKAFHETLECCGRGISNPFTTLITQGLTDICPKSVSASTTDCHGKIRELFNEKVYLIGIAALIVAIIMIFEMTFSMVLCCGIRNSPVY	227	10	0.0440529
plectin isoform X2	642120605	3812	438 kDa	MYSEGVSNLYFHFFLTVADVCSLLCLADERDRVQKKTFTKWVNKHLIKCVHHRWAGSQSQVTDLYEDLRDGHNLISLLEVLSGETLPREKGRMRFHKLQNVQIALDFLKHRQVKLVNIRNDDIADGNPKLTLGLIWTIILHFQISDIQVNGQSDDMSAKEKLLMWSQRMVDGYQGIRCDNFTTSWRDGKLFSAVIHKHQPRLIDMSKVYRQTNVQNLEYAFNVAETDLGVTRLLDPEDVDVPHPDEKSIITYVSSLYDAMPRDVQDGIQANELELRWTEYYELVTIIRQWISHHVVIFGERRFPGSYEEIEILWRQFLKFKETELPAKEADKHRSKLIYQSFESAVHAGQVKVPPGYHPIDVEKEWGRLHVSILERERLLRTEFERLERLQRIVSKVQM…	3812	32	0.00839454
syntaxin-7	642121188	262	29 kDa	MAYQYGKVQDPNVLTQTIISNIQKIAQQTSEIQSIVDKLGTPQDTTELRQQLQQKQQNVNHLAKETDRSVKQFGSLPVTTEQRQRKIQKDRFINDFSNALANFQKTQRQAAQKEKAFVARVRAESRVSGGYPDDSFGGNGNVFESGGQAQVQSQSQEVAITEEDLQLIQERETSIRQLESDITDINEIFKDLGMMVHEQGDVIDSIEANVETADLHVQNATQQLAQAADYQRKSRKKICILIVVLAVLAVVIGLIIWASVKG	262	1	0.00381679
pyruvate carboxylase, mitochondrial	642122413	749	83 kDa	MHCAQRLFFFHPLFPAHLMQSLLKWGTNIPFLQNVLSNDQFLYGTVDTQFIDENQELFNLKPVQNRAQKLLHYLGHVMVNGPTTPIPVKAKPSSIDPVIPPVPLGEPPVGFRDVLLREGPEGFAKAVRAHKGLLLMDTTFRDAHQSLLATRVRTHDLKQIAPFVAHNFNNLFSVENWGGATFDVAMRFLCECPWKRLQELRALLPNVPFQMLLRGANAVGYTNYPDNAVFKFCEVAKENGMDIFRVFDSLNYLPNLMLGMEAAGTAGGVVEASISYTGDVSDPMRQKYSLEYYLKLADELVRAGTHILNVKDMAGLLKPESSRMLIGALRDRFPDMPIHVHTHDTAGAGVAAMLACAEAGADIVDVAVDSMAGMTSQPSMGAIVACTKGTNLSTGISLE…	749	9	0.012016
FUN14 domain-containing protein 2 isoform X1	642122422	155	17 kDa	MAEKKKDKSEEVVEYLLDKSEEVVDYAKKQRWWNKVFGKNSGPVAEKYDVATQLAIGGVSGWCAGYLFQKVGKLAASAVGGGFFLLQIANHTGYIKVDWKRVERDVNKAKKQLKLNTEKPSKEVRTKVDEVQTFVKKNIVLTGGFAGGFLLGLAS	155	1	0.00645161
surfeit locus protein 4	642123149	269	30 kDa	MGQEELMSRAEDVADQFLRMTKQYLPHLARLCLISTFLEDGIRMWFQWNEQKDYIEATWGCGYFLATCFVLLNLTGQLGGCVLILSRNFVQYACFGLFGVIALQTVAYSILWDIKFLMRNLALGGGLLLLLAESRSEGKSMFAGVPSMGESSPKQYMQLGGRVLLVLMFMTLLHFDPSFFSILQNMVGTALIILVAIGFKTKLAALTLVIWLLAINVYFNAFWTVPAYKPMHDFLKYDFFQTTSVIGGLLLVVALGPGGVSMDEKKKEW	269	5	0.0185874
reticulon-4-interacting protein 1 homolog, mitochondrial	642123340	406	44 kDa	MPAWVIDEYGNNGVLRFTEDATAPSVNSASEVLIQVHAASLNPLDISMRRGYGSNLLKLRRDPVSLGQNGGEFPIILGRDVSGMVLDCGSGVTHFKPGDEVWAAIPPWKQGSLAEMVNLTEYEVSHKPRSLSHREAASIPYVAATALSALVNAGGLCRNNCTNKRQQRSNQSLYQKPWSWFEQEVLITGGSGGVGTFSIQLLKAWGAHVTVTCSHNAEGLVRGLGADEVVDYTAGDVATELGLLEKFDVILDNVGGDSEQWALGLLKSWSGAKYVTLVTPFLLNIDSMGLLEGAVHSGLNLHQKAITNMCNGVFYRWGFYAPDGPALDEVSQLVDAGKILPVVEDTFLFSQVPLAFQKVERGHARGKTVVTVAQEEEGTGVTEEEGVTSDTPEQVREEV…	406	5	0.0123153
AP-1 complex subunit beta-1 isoform X3	642123637	949	104 kDa	MTDSKYFTTTKKGEIFELKAELNSDKKEKKKEAVKKVIASMTVGKDVSALFPDVVNCMQTDNLELKKLVYLYLMNYAKSQPDMAIMAVNTFVKDCEDPNPLIRALAVRTMGCIRVDKITEYLCEPLRKCLKDEDPYVRKTAAVCVAKLHDINAQLVEDQGFLDTLKDLISDSNPMVVANAVAALSEIAESHPNSNLLDLNPQSINKLLTALNECTEWGQIFILDCLANYTPRDDRESQSICERVTPRLSHANSAVVLSAVKVLMKFMEMLPKDLDYYGTLLKKLAPPLVTLLSAEPELQYVALRNINLIVQKRPEILKHEMKVFFVKYNDPIYVKLEKLDIMIRLASQANIAQVLAELKEYATEVDVDFVRKAVRAIGRCAIKVEQSAERCVSTLLDLI…	949	16	0.0168599
presequence protease, mitochondrial precursor	642123837	1027	115 kDa	MFRQSKTVLQKLRSLSFQGHNPSWRFRSTPATERALQYQAGQKIHGFTVKEVVDVPDLFLTAVKLTHDNTGAQYLHAARDDKNNLFSVQLRTTPMDNTGVPHILEHTVLCGSEKYPCRDPFFKMLNRSLSTFMNAFTASDFTMYPFSTQNGKDFQNLLSVYLDAVFFPCLGELDFRQEGWRLENENPTDPSSPLVFKGVVFNEMKGAFSDNEQVYAQHLQNKLYPDHTYGVVSGGEPLAIPDLSWEQLKHFHATHYHPSNARFFTYGDLPLEQHLKQIHEEALSKFERTEPDTAVPNQVHWDRPREDHVTCSPDVMAPDAAKQNTLCMSYLLGDITDTFEGFTLSLMSSLMISGPNAPFYKALIEPKIGTDFSSVVGYDGSTKEASFSIGLQGMAEEDT…	1027	19	0.0185005
ATPase, Na+/K+ transporting, beta 3a polypeptide	642123980	448	53 kDa	MSRICLMLQSHRGFRLTDHSFTWSNKTGSRQSRIDFWLISKCIDSECVTTNICTTPLTDHKAIYIDIKIFTPDTNLGRASYWKLNSSLLNNDIVTFEVKDLLSHFWGKACEEKSYCKNWELFKFETRRAEEEMVIIKITFLSQRSPAGLSGEEKMELIELQNKLDNIYKLKAEGAFIRSRKKWIEEGEQNSSYFFRLEKFHFXXVIQEPLILLFYLVFYGFLAGMFTLTMWVMLQTLDDNIPTYRDRVASPGLVIRPRSLDIVFNRTDTKQYGQYVQHLENFLQQYNDTVQERNELCMVGEYYEQDDQEEKKVCQFKRSLLRQCSGLSDTTFGYTEGKPCVLVKMNRIIGLKPRGDPYINCTAKRESPLQMQYFPSEGRFDKMYFPYYGKNVHSTYVQP…	448	12	0.0267857
ADP-ribosylation factor-like protein 9	642124228	240	26 kDa	MPVVREAAVVGLALAVTGGVAYVIWTYASSGEKPKQEPEKIEKETRKKTAQKAPEPAQQTPTIVTETKATGKQVLVLGLEGAGKTSLLHCFASGSLEQDVTPTQGFNAVSINREDLQIEFLEIGGTENLQPYWKRYMCKAMVLVFVVDSSNAAQFPLAKKHLHELLETDLYLPLVVLANKQDNQGACSITTLHEALSLEEVGDQRKLFLIGTHVRKGDTEVNSAVQDARDLIIQMVQDGR	240	3	0.0125
catenin delta-1 isoform X2	642124259	888	98 kDa	MEQCESAAALLESVREQEVQFEQLTRALEEERRRVRLTSPPSHTLPHTQNGRLGEADIERLKLSEGYINGTQYRMVDPVHGVLDESCTPEDDSQDVQSVFSDDGTNGRRAVNAMKKVITSRTVLPSDSMSIDGGLSVSGMGGYSATLDRTYRQAGGGDYPTATVPRNYHYGPAGGYDDYRSAPPSEAYASLSRGTRMDDRYRPADGYRTLDSGYRAPSRQQLDPYAAQPQLGGMRYAHQAHFGVEDDQRSLGYDDMEYRYGTMPRLGPGPGGLDRRRLRSCEDTLDGDMGGVDPYTWGVNMAMERGSMASLDSTLRKGPPTSWRQPELPEVIAMLNYRLDPVKTNAAAFLQHLTFKNDKVKSEVRRLKGIPALVSLLDNPKKDVHHSACGALKNISYGR…	888	11	0.0123874
lipid phosphate phosphohydrolase 1 isoform X2	642124646	283	32 kDa	MFEAGRIPLVLLDVTCFILVGLPFVILTPQHNPFNRGFFCNDESIRYPLKEDTISYQLLGGVMIPFTLIVVVSGECLGVYMTHIKTKSSLGTNYVARIYKAVGSFLFGAAASQSLTDIAKYSIGRLRPHFLAVCKPMWDRINCIAGGYIENFTCTGDKNMVDEARLSFFSGHSSFSMYCMLFLALYIQARLQTEWARLLRPTIQFFLMATSIYVGLSRVSDYKHHWNDVLTGLLLGAIVAILTVFCVSDFFKTPVDPVEIQEETSHPSLQDNPANGIHYGSTE	283	8	0.0282686
titin isoform X21	642124742	18634	2066 kDa	MWEAPEHDGGSPLTGYQIEKRDVSRKTWVKVITGVQDQEFTVTDVVEGKEYLFRVTACNKCGPGEPAYIDEPVNVSSPATVPDPPENLKWRDKSASGIFLTWEPPKWDGGTGIKGYNIERCQRGTDKWESCGDQVPELKLQVTGLIEGQWYAYRVKALNRLGASKPCKATDEILAVDPKDPPEILLDVKCLAGLTAKAGSKIELPADVLGKPVPKVKWTKGDMVLKGDDRVSIDDKPGHSVVTISKTTREDTATYIIEAHNSCGRATATVDVNILDKPGPPAAFDISEITNKSCFLAWNPPRDDGGAKVTNYIVESRAAESEIWHKLSSTVKETNFKALNLTAFKEYIFRVFAENQFGIGVPAEHMPIIARYAFDSPGAPTKLEPSDIVKDGLTLNWYE…	18634	279	0.0149726
acylglycerol kinase, mitochondrial precursor	642125311	423	48 kDa	MARVVKVFGTLRNHWKKSTVAACALSYGGHWLYGKHCDNLLRKEACLVAREYGRQQISPQEQLRKATVILNPAACSGKANTLFEKNAAPILHLAGVEVTLVKTDYEGQAKKLMELMEQTDMLIVAGGDGTLQEVITGLLRRADQESFSKTPIGFIPLGSHNSLSESLHILSDNQVKHITSATLSILQGETVPLDVLQIKGEKDQPVFALIGLRWGAFRDVAATIKKYWYLGPLKTKAAHWFSTLREWPQVREASVSYLAPTLRPPDLPEQKPQRPHLMYRIAHRLKNYWYPPIPEPPKAEEPERWTERMLSTLELSIHTQNKNPVQTRTDDSLLVCVEPDSFSVGEFITVGEKKMEDATAFTRKSLKLEASACQLNLPEEGAGFYNIDNEEYEAMSVEV…	423	7	0.0165485
elongation factor 1-delta isoform X2	642125484	690	75 kDa	MMPQRNPLCSAMDQSDPDLPSRRCQVDCTTEVAVEGGQRNGGGAASSSPESSSVNGDGNGKRSGKRRRRRKRSAQPDNRPATVAMMTPLPPPPPGQEKGEEPQLCQKGSSRTSPDPAPDSPGAVLLGLRSECGSVWFDRSVYEQAESLYQCWLAHSANGSMTRPIGSPPTLTTDNHPTSSQPSLSPSPQAPNHPSNHPPIVAKEHCIVAEPLQPAAPEFLALPANSPSTPATPDDGYLSLAQTPQAASTSPLTPAPGQPVNGLPRLPMELLRDVWLEKPLYDRAEAAFYQSLYGNNRSLTGNNLGGGASTSHHPQSLVEEEEEEEEEEVVEEEAEGGAMSMGGVCYFLHPDSERVWLDQRRYEAAESRFYSYQDAVVSATLLPQPSSVACTGPLRDNTM…	690	13	0.0188406
dystonin	642125733	8296	934 kDa	MPSFTNTGNTIYKYSKLPQIKILQLYWLLFMLYKMKMTQQAYGINRIQIARVFMSDFKYFLVSCTGPYDDHVDVQSPDEKSVITYVSTMYDVFPKVPDGVEGINANDVDIKWVEYQNMVNYLIQWIKHNVGLMSDRAFPNNPVELKALYTQYLQFKENEIPLKETEKSKIKHLYKMLEVWMEFGRIQLPRGFHPNDVEKEWGKLIVAMLEREKSLRPEVDRLEMLQQIATRVQRDCVTGEDKLALARTALQSDAKRLESGVQFQNEAEVSGYLLECENHLRQQVVDIQILLDGKFYCSDRLVQRVSKLRDDLLGLRAECSSVYSQGRTLTTQQTRMMISGITQSLNSGFSSSNHNSSLTPALTPGGLGSPGSTFTSSFTPGLTPALSPAMTPGGMQPGS…	8296	89	0.0107281
protein NipSnap homolog 3A	642125887	252	29 kDa	MFTVRNSFRRSSRLIENICLKNGYVALDCISTGPQQQQGTFYEFRTYRILPEKNAAFLKLTNEKIHLRTAHSELLGYWSVEYGGLNQVFHIWKYDSYAQRAGVRASLAQDPKWIEEYISKAMPMLMSQDNEVTYLVPWSKVDRPPKEGGVYELASFQMRPGGPAVWGEAFQAAVSTHAAGGHAHLVGVFHSEFGRLNKVNALWWYESPDQRAAVRHKAHGDARVVAAVRESVTYLESQTSKLMFPCPYSPLK	252	3	0.0119048
catenin delta-1 isoform X1	642125900	927	102 kDa	MEQCVCALSVECMEQRESAAALLESVREQEVQFEQLTRALEEERRRVSLLSPPLDYNPVGSSVMSLKTPVNMSVLLNGRLGDVDIERLKLSEGYINGTQVCYMMVDPAHGSLDESYTPEGDSQEVHSAFSDDGTNGRRAGNAMKVITSRTVLPSDSMSIDGGVSVSGMGGYSATLDRSYRQGGGGDYPTATVPRNYHYGPAGGYDDYRSAPPSEAYASLSRGTRMDDRYRPADGYRTLDSGYRAPSRQQLDPYAAQPQLGGMRYAHQGHYGMEDDQRSLGYDDVEYRYGTMPRLGPGPGGLDRRRLRSCEDTLEGDMGGVDTYTWGVNMERGSMASLDSTLRKGPPTSWRQPELPEVIAMLNYRLDPVKTNAAAFLQHLTFKNDKVKSEVRRLKGIPSL…	927	13	0.0140237
ras-related protein Rab-1A	642126005	202	22 kDa	MNPEYDYLFKLLLIGDSGVGKSCLLLRFADDTYTESYISTIGVDFKIRTIELDGKTIKLQIWDTAGQERFRTITSSYYRGAHGIIVVYDVTDQESFNNVKQWLQEIDRYASENVNKLLVGNKCDLTTKKVVDYTTAKEFADSLGIPFLETSAKSATNVEQAFMTMAAEIKKRMGPGATTGGNEKSNVKIQSTPVKPASGGCC	202	4	0.019802
heat shock protein 4a	642126340	827	93 kDa	MSVVGIDLGFQSCYVAVARAGGIETVANEYSDRSTPACVSFGPRNRSIGAAAKGQVVTNCKNTVQGFKRFHGRAFSDPYVQSAKSSLVYDLAQLPSGSTGIKVMYMEEEKVFSIEQVTAMLLTKLKETAETAMKKPVADCVISVPSFYTDAERRSVIDAAQIAGLNCLRLMNETTAVTLAYGIYKQDLPAPEEKPRNVVFVDLGHSGYQVSICAFNKGKLKMLASASDAALGGKDFDEVLVNHFCEEFGKKYKLDVKTKPRALVRLYQECEKLKKLMSANSSDLPLNIECFMNDIDVTGKLNRGHFEEMCAGLLAKVEAPLRSVMEQAKLKKEDLYAVEIVGGASRIPAVKERVCKFFGKELSMTLNADEAVARGCALQCAILSPAFKVREFSITDVVP…	827	15	0.0181378
plasma membrane calcium-transporting ATPase 3 isoform X5	642127130	1195	131 kDa	MANNTADHPPGNSVADGNQEGDFGITVMDLRELMELRSGEAVTKIADSYGDVQGVCRRLKTSPIEGLSGNPVDLEKRHAAFGKNFIPPKKPKSFLALVWEALQDVTLIILEIAAVISLGLSFYHPPGGDSELCGETASGVEDEGEAQAGWIEGAAILFSVAIVVLVTAFNDWSKEKQFRGLQNRIEQEQKFTVIRKGQVIQIPVSELVTGDIAQIKYGDLLPADGILIQGNDLKIDESSLTGESDQVRKSLEKDPMLLSGTHVMEGSGRMVVSAVGLNSQTGIIFTLLGAGDSDEEKKIKKGKKQGPPENRNKAKTQDGIALEIQPLKSDEAVESEEKEPEVEVKRVKKVQVNKKEKSVLQGKLTKLAVQIGKAGLIMSAVTVIILILYFVIDTFGVQG…	1195	18	0.0150628
apoptosis inhibitor 5	642127175	540	61 kDa	MAVTIEELYRNYGILADAKPEDLGQHKYAYQVILDGVKGGPKEKRLAAQFIPKFFSSFPELADAAINAQLDLCEDEDVSIRRQAIKELPRFAAGENIVRVADILTQLLQTDDSAEFSQVNTALVSIFKMDAKATLRGLFSQILQGEDIVRERAIKFLSIKLKTLPEDTMTKEVEDYVFTETKKVLEDVTGEEFVLLMRILMALKGLQTVNGRQQLVELVVEQAFLEQALNPADPDTVDRLLQCTRQALPLFSKNVHSSRFVTYFCDHVLPNLSTLTSPVAELDIQQEVLKLLAEMSPFCGDMEKVEANLLMLFEKLLEFMPLPPEAEGENGENTMSEEPKLQFSYVECLLFSFHQLGKKLPDFLIDKINAERLKDFKIRLQYFARGLQVYIRQLRVALQ…	540	7	0.012963
flotillin-2a	642127330	475	52 kDa	MTKLCIHLXXXKYFIHSDLGCVILVAMTMTSNVFSVKYSTISMVLSSVIVVTMSYSCCLCWPTGGCCGSDGKTYVVGGWSWAWWLITDIQRITLEIMTLQPKCEDVETAEGVAITVTGVAQVKVMVDNELLGYACEQFLGKSVIEIKSVILQTLEGHLRSILGTLTVEQIYQDRDRFAALVREVAAPDVGRMGIEILSFTIKDVYDKVEYLSSLGKSQTAAVQRDADIGVAEAERDAGIREADCKKEMMDVKFQADTKMADSKRGLEMQKAAFNQEVNTKKAEAQLAYELQAAKEQQKIRLEEIEIEVVQRKKQITIEEKEIDRTEKELIATVKRPAEAEAYKMQQLAEGQKMKKVLTAQAEAEKIRRIGEAEAGSIEAIGKAEAEKMRLKAEAYQHYG…	475	10	0.0210526
cell adhesion molecule 1 isoform X3	642127844	243	27 kDa	MMSVCLCLCPAVQSQNLVTDNVAVVEGEVAVISCRVKNNDDSVIQLLNPNRQTIYFRDVRPLKDARFQLVNFSDNELRVSLSNVTLSDEGRYVCQLYTDPPQEAYADITVLIPPGNPIIESREGQVIEGNETEMTCTAMGSKPAATIRWMKGDKELQGKSKVEEMYDTMFTVTSQLTFTVTKEDDGVPVVCIVDHPAVKDVQAQTYLVVHYKPEVKIVVEFPDGLPREGQNMELSCQAKGKPQ	243	8	0.0329218
myosin-10 isoform X6	642127886	877	102 kDa	MLLLFSLFFTPPLSPSSSSSSSSSSPLPAAQKLCHLLGLNVMEFTRAILSPRIKVGRDYVQKAQTKEQADFAVEALAKATYERLFRWLVHRINKALDRTKRQGASFIGILDIAGFEIFQLNSFEQLCINYTNEKLQQLFNHTMFVLEQEEYQREGIEWSFIDFGLDLQPCIDLIERPVSIRLANPPGVLALLDEECWFPKATDKTFIDKLVQEQGTHSKFQKPRQLKDKADFCIIHYAGKVDYKADEWLMKNMDPLNDNVATLLNQSTDKFVAELWRDVDRIVGLDQVAGMAETTFGATYKTKKGMFRTVGQLYKESLTKLMATLRNTNPNFVRCIIPNHEKKAGKLEPHLVLDQLRCNGVLEGIRICRQGFPNRIVFQEFRQRYEILTPNAIPKGFMD…	877	11	0.0125428
thioredoxin-related transmembrane protein 1 precursor	642128224	308	35 kDa	MAPLLDYKIGDAMLFSLPLRSKSILLTCSLILVIYLTSQPALAKPSSLKEITDGNWEDILAGEWMIEFFAPWCPACQQLQPMWNEFADWGEDMGVNIAKVDVTEQPGLSGRFIITSLPTIYHCKDGVFRRYQGARTKDDFLSFIDEKKWQGIEPVSSWFGPSSFMMNTMSALFKLSMFIRRCHNYLTEQLGIPVWGSYIIFGLATLFSGLALGLILVFIADFVFPSRRFNSPNYYQKKQTMEQARLIQQLEEEQEADGEEDDEDDEDGEQEEVWRRVSPVGRPEARGLGYPEEVLRKRVVGNREEEDS	308	5	0.0162338
cysteine and glycine-rich protein 1	642128297	192	20 kDa	MPLGGGNKCGCCQKTVYFAEEVQCEGKYFHKSCFLCMACKKNLDSTTVACHVDEIYCKSCYGKKYGPKGYGFGGGAGTLSMDTGAHLGIRPEEQAAHRPTNNPNASKLATKFGSSDVCPRCAKAVYSAEKVLGGGNSWHKSCFRCSKCGKGLESTTVADKDGEIYCKACYAKNFGPKGFGFGQGAGALAHAQ	192	17	0.0885417
vacuolar protein sorting-associated protein 35	642128482	807	93 kDa	MAETRKQTQIPTTQQSPQDEQEKLLDEAVQAVKVQSFQMKRCLDKNKLMDALKHASNMLGELRTSMLSPKSYYELYMAISDELHYLEVYLTDEFAKGRKVADLYELVQYAGNIIPRLYLLITVGVVYVRSFPQSRKDILKDLVEMCRGVQHPLRGLFLRNYLLQCTRNILPDDGEQLEGEDAMTGDINDSIDFVLLNFAEMNKLWVRMQHQGHSRDREKREKERQELRILVGTNLVRLSQLEGVNVEKYKQIVLSGVLEQVVNCRDSLAQEYLMECIIQVFPDEFHLQTLNLFLRSCADLHQHVNVKNIIIALIDRLALFAHREDGPGIPAEIKLFDIFSQQVATVIQSRQDMPSEDVVSLQVSLINLAMKCYPDRVDYVDKVLESTVEIFNKLNLEHI…	807	16	0.0198265
thioredoxin-dependent peroxide reductase, mitochondrial	642129654	249	27 kDa	MAATIGRLLKTSVIVASGGLKAALPHGTSVSKASRILTHPALQKACLSTSPAKWAPAVTQHAPHFKATAVHNGEFKEMGLDDFKGKYLVLFFYPLDFTFVCPTEIISFSDKASEFHDINCEVVGVSVDSHFAHLAWINTPRKAGGLGEIHIPLLADLNKQVSRDYGVLLEGPGIALRGLFIIDPNGVVKHMSVNDLPVGRCVDETLRLVRAFQFVETHGEVCPASWTPDSPTIKPTPEGSKEYFEKVND	249	5	0.0200803
peptidyl-prolyl cis-trans isomerase B	642129735	216	24 kDa	MVRICERRMKFLVAVTVIVGSVIFLLFPSGSDADEKQKGPKVTAKVYFDIRIGDEDVGRIVIGLFGKTVPKTVENFITLATGEKGFGYKSSKFHRVIKDFMIQGGDFTRGDGTGGKSIYGDRFPDENFKLKHYGPYWLSMANAGKDTNGSQFFITTIQTPWLDGKHVVFGKILEGTDVVKKIEGTKTDGRDKPLKDVSIHDCGKIEVEKPFAIAKE	216	2	0.00925926
solute carrier family 25 member 3 isoform X1	642130162	321	36 kDa	MVCCLFCIVFYSDISCEFGSMKYYALCGFGGILSCGITHTAVVPLDLVKCRLQVDPDKYKSIFKGFSITIKEDGMRGLAKGWAPTFIGYSMQGLCKFGFYEVFKITYSDFIGEENTYLWRTSLYLAASASAEFFADIALAPMEACKVRIQTCPGYASNLRQCAPKMFAEEGIWAFYKGVVPLWMRQIPYTMMKFACFERTVELLYKHVVPKPRAECSKSEQLVVTFVAGYIAGVFCAIVSHPADSVVSVLNKESGSSAIGVLKKLGPKGVWKGLVARIIMIGTLTALQWFIYDSVKVYFRLPRPPPPEMPESLKKKLGLTE	321	14	0.0436137
cytochrome b reductase 1	642130725	276	31 kDa	MAMENFKQFLFALSAAVTVGFVSIIFVLRWVFYFKEGLAWDGGLAEFNWHPVLIVTGFIFMQGIAIIVYRLPWTWKCSKLMMKFIHAGLNILAFIFAAISLVAVFDFHNSQNIPNMYSLHSWVGLAAVILYSLQLVLGVCIYLVPITPTYLRAAFMPLHIYSGLFIFTSVIATALMGITEKLIFGLKNPSYKDSPPEATFVNVLGVLIVIFGGIILWIATRPSWKRPSEQVLRSPPTNGGGSVGIKVSQQTDPIDPKGNGDTRRRSGKLEDSGQVN	276	2	0.00724638
flotillin-1	642131266	424	47 kDa	MFYTCGPNEAMVVSGLCRSPPVMISGGRVFVLPCVQKIQRISLNTLTLNVKSDKVYTRHGVPISVTGIAQMKIQGQNKQMLAAACQMFMGKSEGEIAQIALETLEGHQRAIIAHLTVEEIYRDRKKFSEEVFKVASSDLVNMGISVVSYTLKDVHDDQDYLHSLGKSRTAQVQKDARIGEAQFKRDAVIREAHAMQEKISAQYVNEIQMAKAQRDYELKKASYDIEVNTKKAESEMAYQLQVAKTKQRIEEEKMQVKVVERSQQIMLQEQEITRREKELEAKVKKPAEAERYRLEKLAEAQRAQLIMEAEAEAESIRIKGDAEAFAVEAKGRAEAEQMAKKAEAFQQYKEGAMVDMLLEQLPLMAEEISRPLAQAQKITMISSGGGEVGAAQLTGEVLD…	424	4	0.00943396
voltage-dependent anion-selective channel protein 2	642131965	263	28 kDa	MICFGLVKLDVKTKSSSGVEFKTSGSSNTDTSKVNGNLETKYKWGEYGLTFTEKWTTDNTLGTEITVEDQITKGLKLTFDTQFSPNSGKKSGKVKTAYKREYVNLGVDVDFDFAGPAIHGAAVAGYEGWLAGYQMTFDTAKSKMNQSNFAVGYKTGDFQLHTNVNDGTEFGGSIYQKVNDQLETAVNLAWTAGSNSTRFGIAAKYQLDSSTSISAKVNNASLVGVGYTQTLRPGMKLVLSALVDGKSINSGGHKLGLGLELEA	263	1	0.00380228
enoyl-CoA delta isomerase 2, mitochondrial	642133025	390	43 kDa	MAVALRKISPWRFVRAVQVTHIPTLKLHMTGSMMGATVEQFNHAKSQMGTLKEDPGNEAKLKIYALFKQATQGPCNTPKPGMLDFVGKAKWDAWKSLGSVSQEDARQQYVDLIDSLLAAEGPAVAAQPTGSAATFDTLLVSTEDNITTIRLNRPQKKNAITVEMYNEVIKALEQAGKDDSVITVITGSGDFYCSGNDLTNFTKIPEGGIEQMAKDAGELLREFVKAFIDFPKPLVAVVNGPAVGVSVTLLGLFEIVYATERATFHTPFSQLGQSPEGCSSYTFPKIMGNAKASEMLLFNKKLSAVQACAQGLVTEVFPDSSFQTEVATRLKAYAKLPRNSLALSKQLIRGTEKERLHTVNDQEVERLVERWLSDECMQAIMSFFQAKAKL	390	5	0.0128205

## Sheet: Proteins in Extraction_AgNP
Protein name	Sample gi number	AA length	Molecular Weight	AA	AA length	Cys counting	Cys abundance
cytochrome oxidase subunit 2, partial (mitochondrion)	463157		26 kDa	MAHPSQLGFQDAASPVMEELLHFHDHALMIVLLISTLVLYIIVAMVSTKLTNMYILDSQEIEIVWTVLPAVILILIALPSLRILYLMDEINDPHLTIKAMGHQWYWSYEYTDYEDLGFDSYMVPTQDLVPGQFRLLETDHRMVVPVESPIRVLVSAEDVLHSWAVPSLGVKMDAVPGRLNQTAFIASRPGVFYGQCSEICGANHSFMPIVVEAVPLEHFEKWSTMMLEDA	230	2	0.00869565
cathepsin D	1858020		43 kDa	MKVLYLCLFAALALASDALVRIPLRKFRSIRRTLTDSGRAAEELLAGQEHTKYNNLGFPSSSNGPTPETLKNFMDAQYYGEIGLGTPVQTFTVVFDTGSSNLWVPSVHCSFTDIACLLHHKYNGAKSSTYVKNGTAFAIQYGSGSLSGYLSQDTCTIGGLSIEDQGFGEAIKQPGVAFIAAKFDGILGMAYPRISVDGVAPPFDNIMSQKKVEQNVFSFYLNRNPDSEPGGELLLGGTDPKYYSGDFQYLDVSRQAYWQIHMDGMGVGSQLSLCKGGCEAIVDTGTSLITGPAAEVKALQRAIGATPLIQGEYMVNCDKIPTMPVITFNLGGQSYSLTAEQYVLKESQAGKTICLSGFMGLDIPAPAGPLWILGDVFIGQYYTVFDRDNNRVGFAKSK	398	8	0.0201005
carbonyl reductase/20beta-hydroxysteroid dehydrogenase B	4416070		30 kDa	MSKKVAVVTGANKGTGLAIVRELCKAQFTGDVILTARNEKLGNEAVKMLKSEGFEVSYHHLDICDQGSAKQLSNFLQKTYGGLDVLINNAGMAFKNDATETFGEQAEVTMRTNFWGTLWVCHALLPLLRPNARVVNVSSFVSKKALDTCSPQLQAKFRDTELSEEELCLLMGQFVIAAQQGNHQAQGWPNTAYGTTKIGVTVLSRIQAHFLTKTRAADGILLNACCPGWVRTDMAGSKAPKSPEEGAQTPTYLALLPEGAKEPHGQLVWDKTVQEW	276	7	0.0253623
natural killer cell enhancement factor	7963723		22 kDa	MAAGKARIGHLAPGFTAKAVMPDGQFKDISMSDYRGKYVVFFFYPLDFTFVCPTEIIAFSDAAEEFRKIGCEVIGASVDSHFCHLAWTNTPRKHGGLGAMKIPLVADTLRSISTDYGVLKEDEGIAYRGLFIIDDKGVLRQITINDLPVGRSVDETLRLVQAFQFTDKHGEVCPAGWKPGSDTIKPDVQKSKDFFSKQQ	199	4	0.0201005
MHC class I heavy chain	9937589		39 kDa	GLLHTASAATHSLKYFYTASSEVPNFPEFVAVGMVDGVQMVHYDSNSQRAVPKQDWMNKAAETLPQYWERETGNLKGTQQTYKANIDIVKQRFNQSGGVHINQRMYGCEWNDETGATGGYSQDGYDGEDFIAFDLKTKTWIAPKPQAVITKLKWDSDIAMTERDKHYLTQTCIEWLKKYLDYGKSTLMTTVPPSVSLLQKTPSSPVTCHATGFYPSGVMVFWQKDGQDQHGDVEHGETLPNDDGTFQKSTHLTVTPEEWKKKQYQCVVQVTGIKEDFIKVLTESEIKTNWNDPAPNIVLIIGVVVALLLVIVAVVGVVIWKKKSKKGFIQAQSSDTDSDNSGRAAQQI	348	4	0.0114943
collagen a1(I)	14164347		137 kDa	MFSFVDIRLALLLSATVLLARGQGEDDRTAGSCTLDGQFYNDRDVWKPEPCQICVCDSGTVMCDEVICEDTSDCPNPVIPHDECCPICPDDGFQEPKVEGPQGDRGAKGEPGPAGFPGNDGIPGQPGLPGPPGPPGPPGLGGNFSPQMSGGFDEKSGGGMSMPGPMGPMGPRGPPGPPGSSGPQGFTGPPGEPGEAGSSGPMGPRGPAGPPGKNGDDGESGKPGRPGERGASGPQGARGFPGTPGLPGIKGHRGFSGLDGAKGESGPAGPKGEGGASGENGAAGAMGPRGLPGERGRAGPNGAAGARGNDGAAGAAGPPGPTGPAGAPGFPGGPGAKGEVGAQGARGGEGPQGSRGEAGNPGPAGAAGPAGNNGADGNPGTKGAPGSSGIAGAPGFPGP…	1449	18	0.0124224
glutamate dehydrogenase 1	21666610		60 kDa	MYRYFGELLTRGASSALASGCVESALPVTASLMRVRHYSEVVGEKDADDPNFFKMVEGFFDRGANIVEDKLVEDLKNKETPVQKRHRVRGILKIIKPCNHILSVSFPIKRDNGEWEVIEGYRAQHSQHRTPCKGGIRYSTEVSVDEVKALASLMTYKCAVVDVPFGGAKAGVKINVKNYTDNELEKITRRFTIELAKKGFIGPGIDVPAPDMSTGEREMSWIADTYANTMGHHDINAHACVTGKPISQGGIHGRISATGRGVFHGIENFINEAAYMSQLGLSPGFTDKTFVIQGFGNVGMHSMRYLHRFGAKCVGVGEMDGNIWNPNGIDPKELEDYKLQHGTIVGFPNSTPYEGSILEADCDILIPAASEKQLTRNNAHKIKAKIIAEGANGPTTPDA…	544	7	0.0128676
glutamate dehydrogenase 3	21666614		60 kDa	MYRYFGELLSRGAGSALASGCVDSALPASASLMRVRQYSEQPDDPNFFRMVEGFFDRGAAIVEDKLVEDLKSRETPEQKTKRVKGILRIIKPCNHVLSVSFPIKRDNGEWEVVEGYRAQHSQHRTPCKGGIRYSEEVSVDEVKALASLMTYKCAVVDVPFGGAKAGVKINVKNYSDNELEKITRRFTIELAKKGFIGPGIDVPAPDMSTGEREMSWIADTYANTIAHTDINAHACVTGKPISQGGIHGRISATGRGVFHGIENFINEASYMSMLGLNPGFQDKTFIIQGFGNVGLHSMRYLHRYGAKCVGIAEYDGSIYNPEGIDPKQLEDYKLQHGTIVGFPGAQPYEGSLLEAQCHILIPAASEKQLTRNNAHRIKAKIIAEGANGPTTPDADKIFL…	539	7	0.012987
14-3-3C1 protein	34452065		28 kDa	MDKTELIQKAKLAEQAERYDDMASSMKEVTEKGAELSCEERNLLSVAYKNVVGARRSAWRVISAIEQKTEGSDKKLQMVKEYRNKVETELRDICNDVLGLLSKYLIENAPNAESKVFYLKMKGDYYRYLAEVASGDDKKETISNSQDSYQEAFDISKKEMQPTHPIRLGLALNFSVFFYEILNSPEKACSLAKQAFDDAIAELDTLSEDSYKDSTLIMQLLRDNLTLWTSDNAADEPETGEEGEN	245	3	0.0122449
14-3-3E1 protein	34452069		29 kDa	MGDRDELVYQAKLAEQAERYDEMVESMKRVAGLDVELTVEERNLLSVAYKNVIGARRASWRIISSIEQREENKGGEDKLKMIREYRQTVENELKSICNDILDVLDKHLIPAANTGESKVFYYKMKGDYHRYLAEFATGNDRKEAAENSLVAYKAASDIAMIELPPTHPIRLGLALNFSVFYYEILNSPDRACRLAKAAFDDAIAELDTLSEESYKDSTLIMQLLRDNLTLWTSDMQGDAGEEQQNKEALQDVEDEPQ	257	2	0.0077821
calpain 1 catalytic subunit	50812445		80 kDa	MEQVYASGMAAKLRSQWDRDEGLGQNHNAVKFQGQDFKSLRARCLQSRSLFEDSLFPCASSSLGFNELGPRSSKTQGVRWMRPTEICTRPQFIVDGATRTDICQGALGDCWLLAAIASLTLNDNLLHRVVPHGQDFRGQYAGIFHFQFWQYGEWVEVVIDDRLPVKDGKLLFVHSAEGGEFWSALLEKAYAKLHGCYEALSGGSTSEGFEDFTGGVTEMYELRKAPSDLYSIISRAVERGSLLGCSIDITGSQDMEAVTFKKLVKGHAYSVTGVDEVVYRGNMTKLVRIRNPWGEIEWTGAWSDNSREWESVDRSVRGRLQNRSEDGEFWMSFSDFLREFTRLEICNLTADALEANQQKKWSSAVYQGEWRRGSTAGGCRNFPATFWINPQFKIDLQHP…	704	12	0.0170455
heat shock 90kDa protein 1 beta isoform b	60223017		83 kDa	MPEEMRQEEEAETFAFQAEIAQLMSLIINTFYSNKEIFLRELISNASDALDKIRYESLTDPTKLDNGKELKIDIIPNVEERTLTLIDTGIGMTKADLINNLGTIAKSGTKAFMEALQAGADISMIGQFGVGFYSAYLVAERVTVITKHNDDEQYIWESSAGGSFTVKVDSGEPMLRGTKVILHMKEDQTEYVEEKRVKEVVKKHSQFIGYPITLFVEKEREKEISDDEAEEEKEEKAAEKAEAEDKPKIEDVGSDDEEDSKDKDKKKTKKIKEKYIDQEELNKTKPIWTRNPDDITMEEYGEFYKSLTNDWEDHLAVKHFSVEGQLEFRALLFIPRRAPFDLFENKKKKNNIKLYVRRVFIMDSCEELIPEYLNFVRGVVDSEDLPLNISREMLQQSKI…	724	6	0.00828729
TPA_exp: RTN4-L	70721638		42 kDa	MEDSEQVVSSTTPSEDEMRSYRQFGNHYGNEATAKVGKDDIVDLVGGAQDAIERHMASCPDDLKEFTEEAKEQLTNEVISDITPSDEEQEEEVTDTFSEAQPVILNPLDADYLPELIRPDPPKAAQEKEPAPVVESAPVEAAPVAEVLPEAAPEKEAIAAPPAPSRVLQRWNIDKRDEHFLPSTPLQPLMQFPKVVELLYWRDVKTSGVVFGASLSLLLSLTLCSIVSVSSYIGLALLSVTICFRIYKGILQAIQKSDEGHPFKLYLDQDVALSEGTVHKYSDCVLARFNTTVTELRRLFLVEDLVDSLKFAVLMWILTYVGALFNGLTLFILGLVGMFSCPIVYEKYKVQIDHYVGMANKHVKDIIATVQSKVPGLKRVKAE	383	5	0.0130548
RACK1	144952774		35 kDa	MTEQMTVRGTLKGHNGWVTQIATTPQFPDMILSASRDKSIIMWKLTRDETNYGIPQRALKGHSHFVSDVVISSDGQFALSGSWDGTTLRLWDLTTGTTTRRFVGHTKDVLSVAFSADNRQIVSGSRDETIKLWNTLGVCKYTIQDESHSEWVSCVRFSPNSSNPIIVSCGWDKMVKVWNLANCKLKTNHIGHTGYLNTVTVSPDGSLCASGGKDGQAMLWDLNEGKHLYTLDSGDNINALCFSPNRYWLCAATGPSIKIWDLEGKIIVDELRQEVISTNSKAEPPQCTSLAWSADGQTLFAGYTDNLIRVWQVTIGTR	318	8	0.0251572
succinate-CoA ligase GDP-forming alpha subunit	223049433		34 kDa	MSHSRLFARLLLQQNGVRSCYTASRKNLYIDKDTKVICQGFTGKQGTFHSQQAIDYGSRLVGGVSPGKGGRTHLGVPVFNSVKEAREGTGAEATVIYVPPPFAGAAIIEAIDAGMPLVVCITEGIPQQDMVKVKHKLLRQSTTRLIGPNCPGVINPGECKIGIMPGHIHKKGRIGIVSRSGTLTYEAVHQTTQVGLGQSLCIGIGGDPFNGTNFIDCLEVFLQDPKTDGIILIGEIGGNAEENAADYLKQHNSGANAKPVVSFIAGLTAPPGRRMGHAGAIIAGGKGGAKEKIAALQQAGVVVSMSPAQLGSTMFKEFEKRKML	324	7	0.0216049
ATP synthase O subunit, mitochondrial precursor	225703264		22 kDa	MAALGLGLQVRQFSTSVLRQALIRPPIDVYGVGGRYATALFSAASKQKKLEQVEKEMRTLSALIKDPKLSSIVMNPHVKRSLKLKFFGDAMTKANLSPISVNLITVLADNGRLTLTADVVGAFAKMMSAHRGEVICTVTTAHPLDEANLAELKVALNGFLAKGETLILETKSDASILGGMIVSIGDKYVDMSTKTKIHKLTKIIRDS	207	1	0.00483092
Vesicle transport protein GOT1B	225703304		15 kDa	MISLTDSQKIGMGLTGFGVFFLFFGMILFFDKALLAIGNILFVAGLSFVIGLERTFRFFFQKHKMKATSFFLGGVLIVLIGWPIVGVVLEVYGFFLLFRGFFPVAVGFIRRIPILGSLLNLPFISGFVDKVGESNTMV	138	0	0
Cytochrome c oxidase subunit 5A, mitochondrial precursor	225703404		16 kDa	MFRAVVRLSTSGVRSLARIRPCYSAPLASRCCSHAKVETDEEFDARWVTYFSKPDIDAWELKEGMNTLIGYDLVPEPKILDSALRACRRLNDLASAIRILEAVKDKSGPHKDIYPYLIQELQPTLIELGISTPEDLGMDKL	141	4	0.0283688
Dynein light chain 1, cytoplasmic	225703558		10 kDa	MSDRKAVIKNADMSEEMQQDAVECATQALEKYNIEKDIAAYIKKEFDKKYNPTWHCIVGRNFGSYVTHETKHFIYFYLGQVAILLFKSG	89	2	0.0224719
Probable signal peptidase complex subunit 2	225703628		23 kDa	MAVRNGKNGLLEKWRIDEKPVKIDKWDGAAVKNSLDDAAKKVLLEKYGYAENFNLVDGRLLICTISCLFAIVALIWDFLHPFPESKPVLAICVISYFIMMGFLTLYTSYQEKNIFLVSVQKDPAGMDLNHTWQLSSSLKRFDDQYTLRVSLTDGKSKHTREQEITKSVGAFFDGNGTLVMDQFEKCVSKLHNTLATEKKTK	201	4	0.0199005
Dolichyl-diphosphooligosaccharide--protein glycosyltransferase subunit DAD1	225703640		13 kDa	MSNSVISVISRFLEEYTTKTSNKLKVVDAYLFYILLTGALQFLYCLLVGTFPFNSFLAGFISCVGAFILGVCLRIQINPDNKGDFLSISQERAFADFLLAHTVLHLVVINFIG	113	3	0.0265487
Thioredoxin	225703826		12 kDa	MIIIIDDKEAFLSALTEAGDKLVVVDFTATWCGPCKNIAPFFKGLSEKPENSNVVFLKVDVDDAADVAQHCEIKCMPTFHFYKNGQKVDDFSGANQATLEEKVKALRS	108	4	0.037037
Vacuolar ATP synthase 16 kDa proteolipid subunit	225704106		16 kDa	MSSESPEYSPFFAVMGASAAMVFSALGAAYGTAKSGTGIAAMSVMRPELIMKSIIPVVMAGIIAIYGLVVAVLIANNISEKVTLYKSFLHLGAGLSVGLSGLAAGFAIGIVGDAGVRGTAQQPRLFVGMILILIFAEVLGLYGLIVALILSTK	153	0	0
Vacuolar ATP synthase subunit G 1	225704160		13 kDa	MASQSQGIQQLLQAEKRAAEKVAEARKRKNRRLKQAKEEAQAEIEQYRMQREKDFKTKEAAALGSHGNSAVEVDKETVGKMGSIQTSYQQNREGVLGNLLKMVCDIKPEIHVNYRFAG	118	1	0.00847458
FK506-binding protein 1A	225704200		12 kDa	MGVEIETITPGDGQTFPKKGQTCVVHYVGSLTDGTKFDSSRDRGKPFKFKIGKQEVIRGWEEGVGQMSVGQRATLTCTPDFAYGSKGHPGIIPPNSTLIFDVELMGLE	108	2	0.0185185
Activated RNA polymerase II transcriptional coactivator p15	225704320		14 kDa	MPKSKEVLSSTSGSASASDSDSEAETKAKKRKQAAPEKPAAKKPKGGESSKPGGTSKGSGNKDKDDNKFQIGKMRYVSVREFKGKCLIDIREYWMDQEGEMKPGRKGISLNPEQWNQLKDQISEIDDAVKAI	132	1	0.00757576
ATP synthase subunit g, mitochondrial	225704454		11 kDa	MAQAVQKLVAKVPTLIGAAATYSKPRLATFWHYAKVELVPPSPAEIPQAIAGIKNILTGVNSGRLGQTTVKDAFRNGLVCTEVLMWFYIGECIGKGGIVGYAV	103	2	0.0194175
Receptor expression-enhancing protein 5	225704748		22 kDa	MAAMVQDIKERFDKFLHEKNFMTDALAKIEAKTGVNRAYIAIVVVVILAIYLVIGYGASLLCNLIGFVYPAYISIKAIESVTKDDDTKWLTYWVVYGVFSVAEFFADIFPSWFPFYYMGKCAFLVWCMAPTPSNGSIQIYTRIIRPIFLKHESKIDNIAKDLKGKATEAADKFKDEAKKATANMMWEEGMKKDS	194	3	0.0154639
Thioredoxin	225704970		12 kDa	MIIEIEDKDSFFSALKEAGDKLVVVGFTASWCGPCKNIAPFFKGLSEKPENKNVVFLKVDVDEAADVAKHCDIKCMPTFHFYKNEKKVDDFSGSNEAKLEEKVNTLRS	108	4	0.037037
Pituitary tumor-transforming gene 1 protein-interacting protein precursor	225705296		20 kDa	MNKTERGIMSSLLVVVTVTCVLVSRAECLTSTTPMPLNSCKAFSTCDSCIQNPKCLWCMTNDTCTDYPVSYILPPPAVCKLSQARWGVCWVNFEALIIAMAVLGGTIIISITVCCCCCCCCKKRQSGPDRDEERFARKREEIRQRADERKVERKVRHDDIRKKYGLVPDSDHPYSKFENE	180	18	0.1
Profilin-1	225705416		15 kDa	MAWDGYITNLMAGTPPFVQEAAICGSDAGKESVWAATPGGQLAGVTVAEIKAMMSLDRSPLFASGLHLGGNKCTVLRDNLHTEGDNTLDVKMRPTATDPLSYSITIAKTGQTLIIVKGMKDIPGGKINIKASDMMQYLRKNGY	143	2	0.013986
Syntaxin-7	225705430		29 kDa	MAYQYGKVQDPNVLTQTIISNIQKITQQTSEIQRIVNQLGTPQDTTELRQQLQQKQQNVNHLAKETDRCVKEFGSLPVTTEQRQRKIQKDRLINDFSNALANFQKAQRQAAQKEKEFVARVRAESRVSGGFPDDSFGGNGNPFESGGQAQVQSQSQEVAITEEDLQLIQERETSIRQLESDITDINEIFKDLGMMVHEQGDMIDSIEAHVETADLHVQNATQQLAQAADYQRKSRKKICILIVVLVVLAVVVGLIIWASVKG	262	2	0.00763359
Short chain 3-hydroxyacyl-CoA dehydrogenase, mitochondrial precursor	225705700		33 kDa	MAFFTHQVIRGLSSSAVRNAAIKHVTIIGGGQMGAGIAQVAATTGHSVVLVDTNEEILKKSAKGIEGSLKRVVKKKFADKPDAGAEFIAKVMANVSISTDAASVVGSTDLVLEAIVENLKIKQGLFGALDKVAPAHTIFASNTSSLPITDIASSTSRLDRFGGLHFFNPVPMMKLVEVIGTSATSQDTFDSLLAFSKALGKTPVSCKDTPGFIVNRLLVPYMMEAIRLHERGHGSKEDIDIAMKLGAGYPMGPFELLDYVGLDTAKFIMDGWVEKDPDNPLMQPSEMLNKLVAEGKFGKKTGEGFYKYK	309	1	0.00323625
ATP synthase f chain, mitochondrial	225705926		10 kDa	MADRIVPLGEKRLMDVKLGELGSWLGKRDFTPNGVLASIRNGHDRYYNKYINVKKGGIGGVAMLLVGYVALSYMWEYDHLKHDRWRKYH	89	0	0
ERp57	444745627		55 kDa	MLKLFFFVVLARVALASDVIEFTDDDFDSKIGDHGMILVEFFAPWCGHCKKLAPEYEVAATRLKGIVGLAKVDCTVHNNVCQKYGVSGYPTLKIFRDGEDAGAYDGPRNADGIVSHLKKQAGPASVELKTEADFTKYVGDRDASVVGFFADGGSPAKAEFLKSASALRESFRFAHTNSEELLQKHGVEGEGIILFRPSRLNNKFEESSVKFSEDTFTNAKIKPFIQDNIFGMCPHMTDDNKDQMKGKDLLVAYYDVDYEKNPKGSNYWRNRVMKVAKGFLDQGNKLNFAVASKNSFSQDIAEMGLDASSGELPVVGIRTAKGDKYVMTEEFSRDGKALERFLQDYFDGKLKRYLKSEPIPENNDGPVKTVVAENFDAIVNEEDKDVLIEFYAPWCGHCK…	493	7	0.0141988
insulin-like growth factor binding protein 6 paralog A2	461489527		22 kDa	MLLYPDLLALLFLQLALSSPWTLASRLPPLRGRSPSSKGLQGARAPNQRQQSGELSTTVLFLGEPCGVYTLSCARGLRCAPPLGDPSPLQALLQGRGVCGNASEPSPSESPQPKATHPTLTEDLEKAPCRRLLNTVLKGLEPVVFQSDRGDIYMPNCDKRGFFRKKQCRSSRGMHRGHCWCVNESGMSTSSHTSPEGTLICDNV	204	10	0.0490196
GRP94a protein	530445990		91 kDa	MKRIWFIGLLCALLAFASVRAEDELDIDGAVEDDLGKSRDGSKTDDEVVQREEESIQLDGLNAAQIKEIREKSEKHVFQAEVNRMMKLIINSLYKNKEIFLRELISNASDALDKIRLLSLTNEDALAANEELTIKIKSDKEKNMLHITDTGVGMTKEDLIRNLGTIAKSGTSEFLNKMTEVESEGQSTSELIGQFGVGFYSAFLVADKVIVSSKHNNGTQHIWESDSNEFSVIEDPRGDTLGRGTTITLVMKEEATDYLELETIKNLVRKYSQFINFPIYVWSSKTETVEEPIDEDTEAEEKDATEDEVEVEEEEDEKEDKPKTKKVEKTVWDWELMNDIKPIWTRPAKEVEEDEYKAFYKTFSKDTDEPLSHIHFTAEGEVTFKSILFVPAAAPRGMF…	795	3	0.00377358
GTP-binding nuclear protein Ran-A-1, partial	575523769		24 kDa	MAEGEPQVQFKLVLVGDGGTGKTTFVKRHLTGEFEKKYVATLGVEVHPLVFHTNRGAIKYNVWDTAGQEKFGGLRDGYYIQAQCAIIMFDVTSRVTYKNVPNWHRDLVRVCENIPIVLCGNKVDIKDRKVKAKSIVFHRKKNLQYYDISAKSNYNFEKPFLWLARKLIGDPNLEFVAMPALAPPEILMDPSLAAQYEHDLKVASETALPDEDDDL	215	3	0.0139535
mitochondrial isocitrate dehydrogenase variant 2, partial	575523970		50 kDa	MAGYLKVLRLSLGRRPLSPKTPLCSRQSLQQRNYGDKRIKVSQPVVEMDGDEMTRIIWEFIKEKLILSNVDVELKYYDLGLPYRDQTDDQVTIDSAIATQKYHVAVKCATITPDEQRVEEFKLKKMWKSPNGTIRNILGGTVFREPIICKNIPRLVPGWTQPITIGRHAFGDQYRATDFVISQPGTFKMVFSPTDGSKGQEWEVYKFPGGGCGMGMYNTDESISGFAHSCFQYAIGKKWPLYLSTKNTILKAYDGRFKDIFEEIYQANYKPEFDKLKIWYEHRLIDDMVAQVLKSDGAFVWACKNYDGDVQSDILAQGFGSLGLMTSVLVCPDGKTIEAEAAHGTVTRHYREHQKGNPTSTNPIASIFAWTRGLEHRGKLDGNPDLIKFALTLERVCVE…	446	10	0.0224215
cullin-associated NEDD8-dissociated protein 1	641931181	256	28 kDa	ALVPPVVACVGDPFYKITSEALLVSQQLVKVIRPLDQPERDTFDASPYITDLFTCTIKRLKAADIDQEVKERAISCMGQIICNLGDSLGDDLPGTLHIFLERLKNEITRLTTVKALTLIAGSTLKIDLRPILDEAVPILASFLRKNQRALKLSTLAALDILVKNYSDSVTPAMIDAVLAELPPLISESDMHVSQMVISFLTTLARVHPLSLAKIGGSSILSELISLVRSPLLQGGALSAMLEFFQVSMVTSSSLNR	256	4	0.015625
tubulin alpha-4A chain	641964212	380	43 kDa	MPNNKAVGSTDDSFTTFFSATGIGKYVPRAIFVDLEPTVIDEVRTGTYRQLFHPEQLISGKEDAANNYARGHYTIGKEIIDQVLDRIRKLADQCTGLQGFLVFHSFGGGTGSGFTSLLMERLSVDFGKKSKLEFAIYPAPQVSTAVVEPYNSILTTHTTLEHSDCAFMVDNEAIYDICRRNLDIERPSYTNLNRLISQIVSSITASLRFDGALNVDLTEFQTNLVPYPRIHFPLATYAPVISAEKAYHEQLSVAEITNSCFEPANQMTKRSIQFVDWCPTGFKVGINYQPPTVVPGGDLAKVQRAVCMLSNTTAIAEAWARLDHKFDLMYAKRAFVHWYVGEGMEEGEFSEAREDMAALEKDYEEVGIDSFEEDEEGEEY	380	6	0.0157895
neuroblast differentiation-associated protein AHNAK isoform X10	641967756	574	60 kDa	SFGFKGPKLEGPDIDCNLPKADIDLKGPNIDISRPDLNLKGPDAKLSGGSLDMGSPSFSFDKPDVKFPKFKGPTFGIRSPEVEGPELNISHGKMDVKAPEVDLNIGDANIKGPKFKAPKIHMGGKSPKLDVNLPEVDSSVEAPDVDIHVKGKKGKFKLPKIKGKAKKPDVDIDLETSGVDLNVDSPELHLKGAKVKKPFFGKLHFPDVEFDVKSPKVKGDGSLSGGLSSGSLQANIEAPDLNVQVPDVKTKSNIKFPGMKIKGPQINVPDVDVNVNRKNLKGEASLSGDLKGPKIDIGGGGGRVDVDSNVSGYSGLHFPEGHVSFPKINVPKYHGPEMGEDVDAGSRAGAGATVRGGKIDVQAPSVSGSSPSLELHSGEKGKVKMPRFGFGKSKAKGGS…	574	1	0.00174216
extended synaptotagmin-1	641973123	168	19 kDa	MTPQAGQEVKVELYDKDMDKDDFLGRCNISMRDIIHSQYTDQWYTLNDVKSGRVHLVLEWVPTVSEPDRLDQVLQLQSLQSYQNKAVPSTALLFVYMDRAHSLPFKKSGKEPKAGAELVLGKTTYRTKVCDRTNSPQWDEAFYFLVRDPREEILIVKVRVQSASGWSC	168	3	0.0178571
ATP synthase F(0) complex subunit B1, mitochondrial	641977259	139	15 kDa	MIMGTLNSTLKFYMPVLTIVPTIKSACLPRLVQLSHLHTSPNSQAPVPALPEKGGKTRHGIIPEEIFQLLYPKTGVTGPYMLGAGLLTYILSKEIYIINHETFAAACMGTVIIYGVRKFGPDVAAFADKLNEVRNVLSS	139	2	0.0143885
extended synaptotagmin-1	641990654	224	25 kDa	MKVVGVKAHTEHDKRQVLLDLYISYAGDVEINVEIKKYFCKAGVKGIQLHGKLRVILEPLIGDVPLVGAITMFFIRRPKLDINWTGLTNMLDIPGLNAMSDTMIMDAISSYLVLPNRLTIPLVADLHVAQLRSPLPRGVVRIHLLEAEELTAKDTVIKGIIDGKSDPYAVLRVGTQTFTSHTVDSNLNPQWREMFEVIVHEVPGQELEVEVFDKDQNQDDFLGR	224	1	0.00446429
MOSC domain-containing protein 1, mitochondrial precursor	642000482	95	10 kDa	SKGCHPHLSSSFVILICHPHLSSSFVILARCISTTVDPETGVISRKQPLDTLKSYRMCDPSQKNIYKAAPLFGQMYIVSKTGVLQVGDVVYKTSH	95	4	0.0421053
hexokinase-1	642002380	294	33 kDa	CDERYTSILFLLVTEKGDFIALDLGGSAFRILRVKVSHEKKQTVQMESQVYDTPEDIIHGSGTQLFDHVAECLGDFMEKQNIKDKKLPVGFTFSFPCAQTKLNESFLLNWTKRFKASGVEGMDVVALLNKAIKKRGDYDADIMAVVNDTVGTMMTCGFDDQRCEVGIIIGTGTNACYMEELRHIDLVEGDEGRMCINTEWGAFGDNGMLEDIRTEFDREIDRGSLNPGKQLFEKMVSGMYMGELVRLILVKMAKEEFLFEGRITPELLTKGTFETKHVLPLKRVKKALPKPRRS	294	7	0.0238095
delta(24)-sterol reductase	642002450	312	37 kDa	EENSDLFHAVPWSCGTLGFLVAAEIKIVPARLWVRLQYEPIRGLENICRRFSEASEDKNNTFVEGLQYSLDEAVIMTGTMTDTAEPDKINRIGLHYKPWFFKHVERYLTENKKAVEYIPLRHYYHRHTRSIFWELQDIIPFGNHPVFRWLFGWMVPPKISLLKLTQGETIRQLYEQHHVVQDMLVPMKHIQTAIARFHQDIHVYPLWLCPFMLPPGRGMVHPKGEEAELYVDIGAYGEPGVKHFQAKASCRQLEQFVREVHGFQMLYADVYMERSEFWEMFDGTLYHRLRKELGCQDAFPEVYDKICKAARH	312	6	0.0192308
D-3-phosphoglycerate dehydrogenase	642007672	437	46 kDa	LHGEIFGGRDCIERFLEKNLINSIQNHYLPRHVPQAAMSMKAGNWDRKKFMGAEMYGKILGIVGLGRIGKEVATRMQSFGMKTIGYDPITPPEVTATWGVDQMSLEQLWPQCDYITVHTPLMPSTAGLLNDTSFAKCKKGVKVVNCARGGIIDEDALLRALESGQCGGAGLDVFEPPKNRALVNHPNVISCPHLGASTKEAQARCGQDIALQIVDMVMGKGLVGAVNAQVLASTFSPGSHQWIKLGEAVGVVLKSCTTSKQPFSQVQITTQGDCLKGSSGYMTSAVMVGLLTDVSKSCPNLVNSLTLAKESGIKVTRNHSEGLTQGACEVEISVNGSSYRATGSVQGGAPVLLELNHSVFRQPVSLTGNLLFLKATASPQLLPSVTGLLATAGVEMESF…	437	12	0.02746
myoferlin	642011722	266	30 kDa	GSFRVYPLSDDPGVPAPPRQFRELPESGLQECLVRIYVVRCMDLQPKDNNGMCDPYIKISLGKKTKDDRDDYTPNTLNPEFGRMFELSCFLPQDKDLKIAVYDYDLLSRDEKVGETVIDLENRLLSRFGAYCGLPQSYCISGTNQWRDQLKPSQILENLARLRGIPSPRTSADGSTLSFGGKDYSLLDFEANRVIHQHLGPARERMALHVLSKQGLVPEHVETRTLYSTYQPTLSQGKIQMWVDIFPKSLGLLGPPCHITPRKAKK	266	7	0.0263158
membrane-associated progesterone receptor component 2	642020224	198	22 kDa	MADDGDRSTGAVDTSGGPGTSEESDGFSLGGMLLNLSILVVVVTICYVIYRRWGKRIGADAAQGSEASSLPKMRRRDFTLEQLGEYDGLQNPRIMMAVNMKVFDVTTGKTFYGRDGPYGIFAGRDASRGLATFCLEKDALREEYDDLSDLNAVQMESVREWERQFMEKYDYVGRLLKPGDEPSEYTDEEDIKDHLKHD	198	2	0.010101
elongation factor 1-gamma	642028659	227	26 kDa	MAQFDPKKFSDMQPKKDGPSKKDAPPKKEKAGKEGGKPQEKKKKEAAPAEEEMDECEAALASEPKTKDPFAHLPKSAFVMDEFKRKYSNEDTLTVAVPHFWEHFDKEGYSIWYGEYKFPEELTMTFMSCNLIMGMFQRLDKLRKNGFASVILFGGNNDSSISGIWIFRGQDLAFTLSDDWQIDYESYAWRKLDPDSDETKTMVKEYFAWEGEFKHVGKPFNQGKCFK	227	3	0.0132159
translationally-controlled tumor protein homolog	642033261	144	16 kDa	MIIYKDIITGDELFTEVYKITEVCDGMLYEVQGKLTSRSEDVDGALIGANASAEGGDEGSEASTVSGVDIVLNSKLQETSAYNKKAYQSYIKGYMKAVKAKLEEQGSKRVQAFMAGAPAAVKMILGNLDKYQVRESTPPLPHVR	144	1	0.00694444
high mobility group box 2b	642041290	101	12 kDa	MVKGDVNKPKGKTSAYAFFVQTCREEHKRKHPEQSVNFAEFSKQCSERWRGLTANDKRRFEDMAKNDKVRYERDMRGYVPPKGMAKSGRRKKDPNAPKRPP	101	2	0.019802
phosphoenolpyruvate carboxykinase	642042746	561	62 kDa	MVKKLPKYENCWLARTDPKDVARVESKTVIVTKNQRDTIPTPGGGAKSQLGSWMSEGDFQKARKDRFPGCMAGRTMYVIPFSMGPVGSPLSKFGVQVTDSPYVVASMGIMTRMGTPVMDKLSQGAEFVRCQHSLGQPLPLKAPLVNSWPCSPEKVLISHLPDTRQILSFGSGYGGNSLLGKKCFALRIASRIAKDEGWLAEHMLILGITNPRGVKRYVAAAFPSACGKTNLAMMKPALPGWTVECVGDDIAWMKFDSQGKLRAINPENGFFGVAPGTSLKTNPHAMATIAKNTVFTNVGETSDGGVWWEGLDPPAAGVSLTDWHGNSWKAGDSAPCAHPNSRFCTPAAQCPIIDPQWESDEGVPIDAIIFGGRRPEGVPLVYESFSWRHGVFVGASMRS…	561	11	0.0196078
endoplasmic reticulum resident protein 44	642045967	289	33 kDa	MKREYRGQRSVTAIADFIRQQKVDPIKEIHSLEEVNSADRDRRNIIGYFDQKDSENYHTFEKVANILRDDCVFLAAFGDVSQTERFSGDNVIYKPMGETVPDMVYLGSLTNFDLTYAWAQDKCVPLVREITFENGEELTEEGIPFLILFHVKEDTESLEKFQHEVARQLISEKGSINFLHADCEKFRHPLLHIQKTPADCPVIAIDSFRHMYVYPEFRDIEIPGKLRQFVLDLHSGKLHREFHHGPDPTDSTPGQEEIGEVASNPPESSFQKLAPSETRYTLLRDRDEL	289	4	0.0138408
magnesium transporter protein 1 precursor	642046355	352	40 kDa	MYLKVLYSLLLMLSFYGIPSTGQKKKETLLSEKVGQLMDWTGKRAVIRMNGEKFRRFVKAPPRNYSVVIMFTALQPQRQCGVCNMYEYSSSYICSMYEYSSSHICSVYEYSSSYISVICLNMNSAPSFIHFPAKGKPKKSDSYELQVRGFAAEQLARWVGDRTDVQIRVIRPPNYAGPLMLGFLLAVIGGLAYLRRNNLEFLYNKNVWAFSALCFCLIMTSGQMWNHIRGPPYAHKNPTTGQVSYIHGSSQAQFVAETHIVLLFNSAVTMGMVLLHEAATSDMDIGKRKSMYLDISLSPLCLSLSSLSISVYISLSLCLYPSFCLSLSIEFKVLNWHGKHTTSPKVCGHLFK	352	11	0.03125
succinate dehydrogenase	642048428	508	56 kDa	MPFSRTEDGKIYQRAFGGQSLKFGKGGQAHRCCCVADRTGHSLLHTLYGRSLRYDTSYFVEYFALDLLMEDGECKGVIALCMEDGSIHRFRSKNTVIATGGYGRTYFSCTSAHTSTGDGNAMVTRAGLPCQDLEFVQFHPTGIYGAGCLITEGCRGEGGILINSEGERFMERYAPNAKDLASRDVVSRSITIEIREGRGCGPEKDHAYLQLHHLPPQQLATRLPGISETAMIFAGVDVTKEPIPVLPTVHYNMGGIPTNYRGQVITHTTEEGDKVVPGLFACGEAACASVHGANRLGANSLLDLVVFGRACAHTIADICTPGEKLSPLKPNAGEESVANLDKLRFADGNMRTSEIRVNMQKTMQNHAAVFRTGKVLKEGCDKMDAIYQTLDDIKTFDRG…	508	16	0.0314961
dihydrolipoyllysine-residue acetyltransferase component of pyruvate dehydrogenase complex, mitochondrial	642048628	262	28 kDa	MGCNLWLFLCAPVSAAPSPASTPSPAVAVSTGTFTDIPISNIRRVIAQRLMQSKQTIPHYYLSVDVNMDQVLELRMELNAEVKAQNIKLSVNDFIIKASALACLKVPEANSSWLDSVIRQNHVVDVSVAVSTPNGLITPIVFNAHTKGLAAISSDVSALAAKARDGKLQPHEFQGGTFTISNLGMFGVKNFSAIINPPQACILAVGGSEKRLLPADNEKGFDVASMMSVTLSCDHRVVDGAIGAQWLAEFRKFLEKPVTMLL	262	5	0.019084
heat shock protein 75 kDa, mitochondrial	642048641	119	13 kDa	MRNNLGNRVTNIKVTPRLDTHPAMITVLEMGAARHFLRTQQMARSTEERAQILQPTLEINAGHDLIKKMHSLKESDSALAQLLLEQIYDNAMIAAGLNDDPRPMIARLNNLLTRALEKH	119	0	0
polypyrimidine tract-binding protein 1 isoform X2	642052579	111	12 kDa	HEDQGLTKDYATSPLHRFKKPGSKNYNNIYPPSGTLHLSNIPPAVGEEDLKALFSSSGASVTAFKFFQKDRKMALIQMSSVEEAVESLIEFHNHDLGDNHHLRVSFSKSTI	111	0	0
coiled-coil domain-containing protein 47 precursor	642053935	488	56 kDa	MRSVYLLLPALLLLLALPVSRGRYNDDFDDGEDLADFADDNDFAEFEDVSEDTAAEPETAPPPRAAPPTQPDEDDEDEATVELEEDGQEDGFEDSDTQDQDMYSKYDPDEFDGMEKPSQSLKDPLIIHTVPAHLQNSWESYYMEILMVTGLLAYIMNYIIGKNKNSRLATAWFNSHRELLESNFALVGDDGTSKDAVSTGKLNQENEHIYNLWCSGRVCCEGMLIQLKFVKRQDLLNVLARMMRPVCDQVQIKVTLNDEDMDTFVFAVGTKKAMARMQKEMQDLSEFCSDKPKSGAKYGLPELLAILTEMGEVTDGVMDSKMVHYITNHADKIESIHFSDQFSGTKVVQEDGQPLKLPETKKTLLFTFNVPGMGNTSPKDMDTLLPLMNMVIYSIDKVK…	488	5	0.0102459
isochorismatase domain-containing protein 2, mitochondrial	642055761	179	20 kDa	MQEKFRPNIFQFTNIVSNAARLLQAARVLGIPPIVTEQYPKGLGPTVPELGAGDLTAHAKTKFTMMIEPVEKELKALGDPKIAILCGIETQACIACTTFDLLEKGMEVHIVADAVSSRSQTDRLFALSRLRQSGAFLTTTEAVLLQLVQDAQHPNFREIQKLLVQPSPDTALLAFFSSL	179	3	0.0167598
fibronectin precursor	642058536	350	38 kDa	IQGYREVMRLYTGLPGTVPAPTNLDFPEVGPDSMRVTWTAPVVPNPADISSFVIRYHPIDDEDDITESSVGRNADTVVLKSKTRAHTHTHTHTHTHTHTHTHTHTHTHTHTHTHTHTHTHTHTHTHTTTLHTXLLLLLLLMPVSVPGVLDQTEMTFSGLQPTVEYILSVYALGQDGESPPLVETAVTAVGRPTDLTFSNVDSTSMTISWDSPDGRVTSYRVLYASPEEGEREMRPAPRGDDESATIHGLRPGSEYTVKVIAMHDRTPSPPLVGVQATAIPAPTNLEFSQITSSSFTIKWRTMPNARLTGYRVVVNPKNKSGPTKEMNVAPDTTQVHVPGLMVIIKTHACL	350	1	0.00285714
fibronectin isoform X1	642058537	506	56 kDa	MGSSYWTKLYCRSDSSGPFSTGLQPGSTYKINIYTLNGNGRSAPFTLTATTAKPVVSPPTNIRFTSLTPSSISFTWEGSRSAGVTGYYVTYEEAGGIPRELTPRPTASRSQAIITGLKPGTEYVIKIVTLQNALRSTPLVGKARTQLASQLPVSHRPSPDILDVPEDEVNPNYPPNTNPNPNFPLNPNGNPDQFNPNGNPNYPTNTNPNPNFPLNPNGNPDQFNPNGNPNFHVNPNPNFHFNPTPTQWEPNTNPNGNPNTNPNGNPNTNPNGNPNTNPNGNFNVNPNHLLCPSVCCFSFVNMLCPFSLPVVPGDHLPSNRDVCYDTFTATYHDVGVEWERMSETGFKLWCRCLGLGSGHFRCDSSKWCHDSGNNYRIGEKWDRHAENGHMMSCTCLGNG…	506	21	0.041502
filamin-A isoform X2	642060667	117	12 kDa	MSSVCSCFVSEQESGLKVNHPASFAVSLNGAKGQIDAKVHSPSGALEGCCVTELDQDKYAVMFIPRENGLYLIDVKFNGSHIPDSPFKIRVGETGQAGDPGMVTAYGAGLEGGTTGN	117	4	0.034188
vesicular integral-membrane protein VIP36 precursor	642061391	337	38 kDa	MRGVGTFISRPLPFLLLHFTLLKCDITDGNVEHLKREHSLMKPYQGVGSSPSSQWDFWGSTLVTSSYVRLTPDERSKQGSIWNTVPVHLKDWEMHVQYKIHGSGKKNLHGDGIAIWYTKERLHPGPVFGNQDHFVGLALFVDTFRNDLHGMDRSFPYISAMVNNGSLPYDHGNDGRTSELGGCSSEIRNKDHDTYLAIRYSKGRLTVMIDIDDKNEWKECIDIGGVRLPTGYYFGASAATGDLSDNHDIISMKMYQLMVEHAPDEDSLDWTKIEPSVSLLKSPKDNIDDPTGNFRSTPLTGWKVFLLLLCALLGIVVCGVVGAVVFQKRQERNRRFY	337	5	0.0148368
lipase maturation factor 2	642064616	701	79 kDa	MGETRLPRHMFLWSMAIIYMFAFASLYVQIPGLYGNEGVLPVRLVDPRVDGSRPVLEQIHAHPSLLWLGPRLGLDLDAQQAMELLCLAGALLALGAALLEPLRDSLVFFCLWALYLSLCQVGGRGWLDSLLLEAGFLTVLVAPLNLLRWRSAFRQHDAVTFWLVRWLLFRLTFGSGVAKLASHCPSWWGLTAVKHMFEAQGIPLPWSWFIQQLPDWYLKLGTVGLLVTEIAVPPLYFAPIRHLRLAAFYIQAVYQVKLMFVGNYGFLPFLSLALTFSLLDDDHISYWLGHGKKKSAKTWHQTIMSLVLLAVFAAIIYGTKVLFTLEMDWETKTMTSKTAFTQQQFGNWLKLVTGPTIWVGVLSLTWEVVAAMLGCVCVRGCLWKLWGLVQWAVIVSAAV…	701	8	0.0114123
calcium-binding mitochondrial carrier protein Aralar1	642066691	194	22 kDa	MAVKVQSTKRADPSELKVIFQKHASVVDADGEKLMTPGDFVQKYLGLHTQIHHNPKTVQLIAGVADTTKDGLISFQEFLAFESVLCVPDALFIVAFQLFDKTGTGDISFENVRDIFSQTTVHHHIPFNWDCEFIRLHFGHDRKKRLSYLEFTQFLQVRTHTGAHAHTHTHTHTHTHTHTHTHTTHTLRSFFVYE	194	2	0.0103093
magnesium transporter MRS2 homolog, mitochondrial isoform X1	642067956	238	27 kDa	MEACFKSFTMGGLRRSLDIKFRVLAGFLTCRTVSCSRSPIKCQLSKHQPVTRGKATLLRSCPSAYFIRHRGTEASLSSVAPAFVMMKFDKDGNVTTFEKKKMELYHELSLQARDLRFQHLTSITARNNNIIIRMEALKAVVTPNSLLVLDFRGLGLERWLVLELAPQLNGDHGALATHSLPFEFRALEAILQHRVNTLQARLNEVHPVILDILESLVDPKLLSADRSKLHILLQNSKK	238	5	0.0210084
ER lumen protein-retaining receptor 2	642068510	201	23 kDa	MNIFRLTGDLSHLAAIIILLLKIWKTRSCAGISGKSQILFALVFTTRYLDLLTSFISLYNTTMKVIYIGCAYATVYLIYMKFKATYDGNHDSFRMEFLVVPVGGLACLVNHDFSFLEILWTFSIYLESVAILPQLFMISKTGEAETITTHYLFFLGLYRALYLFNWIWRFYFEGFFDMIAIVAGMVQTILYCDFFYLYVTK	201	4	0.0199005
long-chain-fatty-acid--CoA ligase 1 isoform X1	642069819	427	48 kDa	MVTCFLLLPGNPKGGMLTHGNVIANCAAFIKITEVHCMLNLHDIHMSYLPLAHMFERVVEGVILVHGARIGYFQGDIRLLMDDLKTLQPTVFPVVPRLLNRMFDKIFGQANTPLKRWLLVFASRRKHAEMMNGIVRKDSLWDKLIFQKVQNSLGGRVRLMITGAAPVSPTVLTFIRAALGCQFYEGYGQTECTAGCTMSMPGDWTAGHVGAPLPCNYVKLVDVTEMNYFAANGEGEVCVKGPNVFKGYLNDPEKTKEALDQDGWLHTGDIGKWLPNGILKIVDRKKHIFKLAQGEYIAPEKVENIYIRSDPVAQIFVHGDSLQACLVGIVVPDPDFLPGWAKKKGIEGSYLEMCASKEMKNAILEDILRLGKEGGLKSFEQVRDISLHTEMFSVQNGLL…	427	10	0.0234192
glutaminase kidney isoform, mitochondrial isoform X4	642070168	325	36 kDa	MLQFRFSAVLKELFQSNLKRPLTGITRNKTSLPIHYCSSNASLDVQVSFKLKLLHAGVHRPLLCAAPGTRTYCTKTEGAAIPVTESAIPVTDQEKKDETAKEAAAEKRRKAGILPSLEDLLFYTIAEGQEKIPVHKFLTALKATGLRTGDPRLKECMDTLKVTLKNTSDGVMLDRDLFKKCVQSNIVLLTQAFRKKFVIPDFQSFSSHIDELYESAKNLTEGQVADYIPQLAKFSPDLWAVSLCTVDGQRHTVGDTKVPFCLQSCVKPLKYAIAVHDHGTEYVHRFIGKEPSGLRFNKLFLDEDDKPHNPMVNAGAIVCTSLIKV	325	9	0.0276923
long-chain-fatty-acid--CoA ligase 4	642071534	711	79 kDa	MGLHQSELHSLLLLPLHLVVWLYSLLSFLPWYYFTRAGEKRTRATRVKARSTSGCSEGPYRCVDRFQSLATEDFPGKDTLDKLFQQAVQRFGDSDCLGTREVLSEENEPQPSGKVFKKLILGEYCWLSYQQVDSVVSYMGSGLAALGQQSKSMVAIFCETRAEWMISAQACFRYNFPLVTFYATLGEEAVAFGLNETGVTHLITSTELLETKLKGVLSQIPKLKHIISVDQRRVSTEGYPPGLAIHSMASVQELGSQPDNLARPVVSPQPSDLAVVMYTSGSTGRPKGVMVVHSNLTAGMTGQCERIPGLGPKDTYIAYLPLAHVLEMTAEISCMAYGCPIGYSSPQTLSDQSTKIKRGSRGDSSVLKPTLMAAVPEILDRINKNVMRKVGEMSYIQRT…	711	21	0.0295359
NAD-dependent malic enzyme, mitochondrial	642072021	588	66 kDa	MLSRLRASLMLRPCVSACRWTHTKEKGKPLMLNPRTNKGMAFSLQERQILGLQGLLPPKIESQDIQAMRFQRNLKKMTEPLEKYIYLMGIQERNEKLFYRVLMEDIEELMPIVYTPTVGLACTQYGHIFRRPKGLFISILDRGHIRSILDNWPETNVAAVVVTDGERILGLGDLGVFGMGIPVGKLCLYTACAGIRPERCLPVVIDVGTDNEAISLFQTLLKDPFYMGLYQKRDRSQLYDDLIDEFMEAVVDKYGQDTLIQFEDFGNHNAFRLMRKYREKYCTFNDDIQGTAAVALAGLLAAQRAIGKPITEHRILFCGAGEAALGIANLITMSMVEKGLTQDEARKKIWMFDKDGLLVKGRSQETDSNQEAFVHESPGDVQSFLDAVNVIQPTAIIGV…	588	10	0.0170068
SERPINE1 mRNA binding protein 1a	642074239	425	47 kDa	MPGHMQEGFGCAIANRFDQLFDDESDPFELLKEAENKKKEAPVPGAAKTAAQAAKLQKKESQKDRKVVPADKKDEPLAPVTLKKDGPGPRRMGPRREGQGPAGGPPREGQGEGRPPTDRPPRTDRRPPRRFERPPGGEDKPAEGGEFSVEKPIGDRQMRGRGGSRGGIRGGRGRGMGRSDGFDARGKREFDRHSGSDRSQKGEEKRGGSGSHNWGTVKDEMGEHDQSNVTEETPEGEEPRPADSENKENEVGEPKEVEPKEMTLDEWKAQQDKEKTKVEFNIRKANEGADSQWKKGYVLHKSKDEKKADALIEAAVEAEAVAPKAEDDHHFRKPANDITAQLEINFGDLGRPSRGRGGPRGGRGSRGRGEGRGEFRGEFREREPREPRERDGGAPTRPT…	425	1	0.00235294
matrin 3-like isoform X2	642075000	1186	130 kDa	MSQKIPSDSSQKGFAVGRGLLAAAETLNFSMNEQRSDSLHGSTSRQLHGMSSAMGGGECDPQLSRRGGGGSHIGNSIKLFSSLGLSPADLDVLAQIPEDNISVETLPHLIMQLKNRKVESDRRMAGNSRGDLSGLSSEPSYRASRDDWDGMRVGKLGGSMGQASAHAQQGDLGYNSIQDTSAGRYELDYGHGSGGRDPGWYSDLSRDRYSGMGMGPPSAADSVFMTRRMGSPSQGKVQDFLGVIPHMFPHVCSLCDFDVHSTMEWNQHTDGLRHTENQRLLLQMYPEWDPHMATGRSGGSHLLETTNQSVGLLGPIPMAERQQAGGGRMSSGWGGGAGSNVGSGKPHQHSMALKQIRSKVVVAKYDRSPLSNKALFALVEPFGTLCEHLVLKNKAFLEM…	1186	13	0.0109612
catenin alpha-1	642075125	195	22 kDa	TQSIEASFPLFNKSRGVNVGWERGKLGIRGRIPDSIHHFEVFFLCLLLFLNKFSKCIVAFRYEVNMTTINTANINFKWDPKSLEIRTLAVERLLEPLVTQVTTLVNSSNKGPSNKKKGRSKKAHVLAASVETATLNFLDKGEKIAKESQFLKDELTAAVEDVRKQGKPWKPCSLFLWMNRYVIHMDGYKSAAVFI	195	3	0.0153846
Niemann-Pick C1 protein isoform X2	642075994	1265	140 kDa	MGLLSERSCLFFLFIILTEGHYTWVQAQHCVWYGECGKSDKVPGKKYNCNYTGPPIPLPAEGHELLTELCPGYDYGNQSLCCDVQQLHTLKGSLQLPLQFLSRCPACFFNLMNLFCELTCSPLQSLFMNGTQFTNGTAANKTNVVEVQYYIGQTFANAMYNACQDVQAPSSNVKALSLLCGKDASDCNATNWIEYMFDINNGQSPFTIIPIFSDVSVSGMSPMNNKTYDCTEGLEDGSGPCSCQDCSPACGPQPVPPPLPPPWTILGIGAMVLIMWISYMAFLLVFMGTVIGTWCYRKRRIESEYGPILDSNNPHSLNKDSIDQVDASCGETLGEHFENALRYLFTRWGSFCVRQPLMVILGSLIIVAACSGGLVYMKITTDPPLWTLLQGRAAHHHHH…	1265	41	0.0324111
protein spinster homolog 1 isoform X1	642076075	507	55 kDa	MSLADPTSDTTPFFSDDSEAEGSEEPGAGPSQRREEEEPASGVSSLRAVFTVIVLCFINLLNYMDRFTVAGVLPDIEQYFGINDGKSGLLQTVFICSYMFLAPVFGYLGDRYNRKMIMSVGISFWSIVTLASSYTPKEYFWLLLLTRGLVGVGEASYSTIAPTIIADLYIKERRTQMLSVFYFAIPVGSGLGYIVGSKVDDLAGDWHWALRVTPALGLVAVVLLLFVVKEPKRGAIEARPEHTLQRTSWLGDMKALCRNPSFVLSTFGFTAVAFVTGSLALWAPAFLFRAAVFTEGRPPCVKGPCDTSDSLYFGIITVVSGILGVASGAEVSRRLRLRTPRADPLVCALGLLLSAPFLYLAIVFAQASPIATYVFIFLGETFLSMNWAIVADILLYVVV…	507	7	0.0138067
MAX gene-associated protein isoform X1	642077295	3168	345 kDa	MAANKKKKIMVLNEEGAAAPMALHSTASPPDLVGALKTGQASGVVANEEANIAATSTPGSAMGVALTMNSTVISNNQPENLPPESTRRGIKVMLDSNNMWNEFFRCKTEMIVTKQGRRMFPYCRFRISGLDPFQKYNLLMDINPADNKRYKWTGQNWKMSGKAEAHMLRRIFIHPDSPSSGHQWMQNPVSFYKLKLTDNTMDQEGNVILHPMHRYLPHLHVVSAEMPTEDIQLNGHDVITFTFPQTEFFAVTAYQNLRMSQFKADFNPFASGPSWALKLKTSSETRSPSELKPVKGLSGLKALMAKRNSKDTSAVDQGLLIPNAQNVTLTFGDKSEVNSHRPSSMLKSSPSNEMKKDPSKSPNELKSVKSLNNLKYLMGKRTSKDTFAAGQGLFSSDTQ…	3168	47	0.0148359
RAB5A, member RAS oncogene family, a	642078099	219	24 kDa	MANRGGATRPNGSNAGNKICQFKLVLLGESAVGKSSLVLRFVKGQFHEFQESTIGAAFLTQTVCLDDTTVKFEIWDTAGQERYHSLAPMYYRGAQAAIVVYDITNEASGESFARAKNWVKELQRQASPNIVIALSGNKADLASKRAVDFQDARSYADDNSLLFMETSAKTSMNVNEIFMAIAKRLPKSEPAAAGANSGRNRGVDLTEAAQPTKAPCCSN	219	4	0.0182648
TBC1 domain family member 17	642078280	615	70 kDa	MIVIPHPIPTRSHFLIHCTGIHDMTFCHYKLYSINSICCFVTQLVFEKEGVYLHTNAKRSNQDTTIPGFIRIVERGGEPALEWSALEDEGRNAAAVFYTKKDGEGGVEDTNFDPGYEPDWAVISTVKRDQVREHPPVKETSQWSFSLPLSELYSLRRSRFSLGRNFLVFTSRGGHPLPPLHFHRGGTRELLRAMQRYIILAPSPVDGRLFLAYPHDSGALSQSFDELHLFDDGSSDLVSRFIQDPYATTFGGFSKVTNFFRGALRPPDSPFHPRGPQDHHGPPTADDEPGFELITCGVELGPKPDVTRGQPLDKWEEFLDPEGRVKDPQQIKELVFRGGITPSLRKDVWKFLLATYSCNRSKRWRYKFEISNKCRLCPTCCRKVQGGRILSQGTVLPHK…	615	15	0.0243902
sulfide:quinone oxidoreductase, mitochondrial isoform X1	642079345	155	17 kDa	MATVRVVHRHRALWRQCHRTAAIGICHLHTTTTSSSSHASSSKEHYKVLVLGGGSGGITMSARMKRKLGAENVAIVEPSEMHYYQPIWTLVGAGAKGVASSGRPTASVVPSGVKWVRSKVQEINPETNTVRTGNGMEVGRAVYFPYRLFDLIHID	155	2	0.0129032
myeloid-associated differentiation marker homolog	642079897	293	32 kDa	MPIVVVHSNPLFWVRLCALVFSCVAFAVTVHGANLSHGTGDWCVFCWAFSFAGTLLVLLVELFGLQTRAPVSWKNFPITFACYASLLCLSASIIFPLYFLKGQTYRSETQNYRIVATVFSCLATIAYICEVSISKARPGEVAGYMATAPGLLKVCETFVACVIFVFISDPVSYDSHDALRWCLAVFCICFILSAAIIVLCICECTGCLPFPFARFLSAYAVLAVAMYLSATIIWPIFKFDKKHGGSSRPYGCGRYAGLCDWDRQMAVAVLTAVNLVLYLADLIYSARLVFVTV	293	19	0.0648464
ras-related protein Rap-2b	642080845	182	20 kDa	MREYKVVVLGSGGVGKSALTVQFVTGSFIEKYDPTIEDFYRKEIEVDSSPSVLEILDTAGTEQFASMRDLYIKNGQGFILVYSLVNQQSFQDIKALRDQIIRVKRYERVPMVLVGNKVDLEGEREVSSGEGKALAQEWNCPFMETSAKNKGLVDELFAEIVRQMNYYSLPSGGDRCCSCVLL	182	4	0.021978
cytoskeleton-associated protein 4	642081291	507	54 kDa	MTARNRNKNNLSEKTASSTQDDVAKKSPKPSSNGSPSIQGSGSGSWVKVIAALCYIALVAAAGFAAIYLQQVLKEVHQISSRNEETVRKNAEVAHKVENVLQQVDNVRRAVDGLESALGTMRAEQEVGSRAVRKGEAETRRVEEALQRLQNELLVDLSEGIKEVKEARERDFSSLEKTVEERLAELSASIADSVTEFTETQGETQSQLADLKARLDDMEDPELIRQELSAIVDTVAGLSTTKQATDESAYSLREQIAAVGSELQTRNQEIASMSQEVEAVRLLVQETAGSLRQQVSGAEAGIQALTDQDQSLQSSLELATEALHSLEKELRGESARAEQRSDGLEVRLKVAEEGGDSLAASLSGLTSKVESLLAKYDSHESMLAAQGTAAEKARATLQG…	507	1	0.00197239
upstream binding transcription factor, RNA polymerase I	642081512	820	96 kDa	MRTIGLAKIVTIYFPFSSFVCLSLHDPSSPHGYKTWFTPCSTTAERKFRVDRTVSRLKKVQMNGEMDASTKDQGEIIVNQREIIVDNQVWTQDDLLNLLEAMKVNLPQKDLAKYKTSESHLDWEKVAFNSFTGEMCKQKWNEVSKVIRKFRTLTELIFDAQDFIKNPYKGKKLKKHPDFPKKPLTPYFRFFIEKRAKYAKLHPEMSNLDLTKILSMKYRGLPDKKKKKYLEDFQKDKETFGHSMSKFREDHPDLVESMAKKGSNVPEKPRTPQQLWYSHEKKAFLKTHADATTKDIKDSLGKQWTQLSDKKRLKWIAKSLEMHKAYEEVMKGFIETHPELNMSNEDIVKSTLTKAERHLKDKSDGRPDKPPPNGYSMFCAELMSSMKDVPSTERMVMCS…	820	9	0.0109756
apolipoprotein O	642081683	223	24 kDa	MYKPWMTDTKSPGREMSNVWKLSAAVPGVLGLMTGTATVLATSEVKKKPAALSLSIEELPSLYVTPEPQLRYVEPEVGPVEQGVAKLRKWAEPYTNQCQVTGLVALEKAEEVYRTVEPTVSASTRTVRETYEFLNDPPPDLYPSVGVVGFSGFLGLYLAKGSRVKRLVFPVGLMALSASMFYPQQAASLTKVSRDSVYSWSQQGRDAVQTLWKDLPFGKGKAG	223	1	0.0044843
transmembrane emp24 domain-containing protein 10 precursor	642081784	206	24 kDa	MARFATLLLLPVLIESVLSISFFLPVNSRKCLREEIHKDVLVTGEYEISDQSNTKTNLKITDSSGHILYSKEGATKGKFAFTTEDYDMFEVCFESKSPMGTGRIPDQLLNLDMKHGVEAKNYEEIAKVEKLKPLEVELRRLEDLSESIVNDFAYMKRREEEMRDTNESTNTRVLYFSIFSMCCLIGLATWQVFYLRRFFKAKKLIE	206	4	0.0194175
caveolin-1 isoform a	642084525	182	21 kDa	MTGGLKDGETDEEFLHSPFIRKQGNIYKPNNKDMDNDSMSGMKTMQDVHTKEIDLVNRDPKHINDDVVKVDFEDVIAEPAGTYSFDGVWKASFTTFTVTKYWCYRLLTALVGIPLALVWGIFFAILSFIHIWAVVPCVKSYLIEIHCVSRVYSICVHTFCDPLFEAMGKCFSSIRISTTKGV	182	6	0.032967
mycophenolic acid acyl-glucuronide esterase, mitochondrial	642084759	289	32 kDa	MAAVALKFCRKGLPHILKDGAVATLSPKALGGVRQKSSVQYATRPELPKLAYCRVKGKSPGVVFLPGYGSNMNGQKAEALEEFCRSLGHSYLRFDYTGHGLSEGVFTEGTIGTWKKDVLFVLDELTEGPQIMVGSSMGGWLMLLAAIARPEKTAALVGISTAADHIVTAFKSMSLEVRKEIEEKGVMTVPTKYSEEGTYTFTIGFLKEAENHCVLQSPIPITCPVRLIHGLKDDDVPWHISMQVAERVLSPDVDVILRRHGQHRMAEKDDIRLMVYTIDDLIDKLTTLV	289	5	0.017301
signal peptidase complex subunit 3	642085113	180	20 kDa	MNTVLSRANSLFAFSLSVMAALTFGCFITTAFKDRRVPVDIHVSRVMLKNVDDFTGPRERSDLGFITFDLSADIKPIFDWNVKQLFLYLSAEYTTKSNALNQVVLWDKIVLRGESTKLNLRDMKSKYFFFDDGNGLRANKNITLTLSWNVVPNAGILPLVMGSGHMSVPFPESYETTKSY	180	1	0.00555556
V-type proton ATPase subunit H isoform 1	642085178	288	33 kDa	MDIRGAVDAAVPTNIIAAKAAEVRANKVNWQSYLQGQMISAEDCEFIKKFEVAHSEEKQIILTNEGHQTPKLHGTGPDSSGQGTISPSESSQYVQCVAGCLQLMLRVNEYRFAWVEADGVNCITAVLSNKCGFQLQYQMGFCVWLLAFNSQLCEQLRRYNVVPALSDILQESVKEKVTRIILAAFRNLLEKSADRETRQEYALAMIQCKVLKQLENLDQQKYDDEDITEDIKFLLESLGESVQDLSSFDEYSSELKSGRLEWSPVHKSEKFWRENAVRLNEKNYELLK	288	8	0.0277778
nodal modulator 1	642086899	166	19 kDa	MGXTTIPITSPEHLPTLSVKLYKSDNLDNPINSVSLGQSLFFHFPPLDRDGETYVLMLHSTLSRSQYDFSLPQVSFTSTGYHKHITLTFNPNRKVPDQDVAQGSYIALPLTLLLLLAAYNHEKVIPLLLQLVSRLQGVRSLSQAGGDNAALDEAKRQAKRQKTRRT	166	0	0
glycylpeptide N-tetradecanoyltransferase 1	642088145	491	56 kDa	MADENETAPKPEKEEEVEEDHGHCSDCENEEHHFDDGDKGQGDDSGAKKKKNKKKKKKSGANKEPAEEDPLGKVDVNSLPADKLQEIQKAIELFSVGQGPAKTMEEASRRSYQFWDTQPVPKLGEMVTSHGSIEPDKDNIREEPYSLPPGFTWDALDLGDAAVLKELYTLLNENYVEDDDNMFRFDYSPEFLLWALRPPGWLPQWHCGVRVNSNQKLVGFISAIPANIRIYDQDKKMVEINFLCVHKKLRSKRVAPVLIREITRRVNLKGIFQAVYTAGVVLPKPVGTCRYWHRSLNPRKLIEVKFSHLSRNMTMQRTMKLYRLNEAPKTSGLRPMTRKDVPAVHRLLLEYLSQFHLAPVMSPEEVEHWLLPQENIIDTYLVVTSGGKVTDFLSFYTLP…	491	6	0.01222
guanine nucleotide-binding protein subunit alpha-11	642088403	301	35 kDa	MRIIHGAGYTEEDKRGFIRLVYQNIFTSMQSMIKATENLKIPFKYEQNRSNAMLVKEVDIEKICGFDQPYISAIKTLWADPGIQEAYDRRREYQLSDSTKYYLTDLDRISDNNYLPTQQDVLRVRIPTTGIIEYPFDLSSIIFRMVDVGGQRSERRKWIHCFENVTSIMFLVALSEYDQVLVESDNENRMEESKALFRTIITYPWFQNSSVILFLNKKDLLEEKISYSHLVDYFPEFDGPQRDAQAGREFILKMFVDLNPDSDKIIYSHFTCATDTENIRFVFAAVKDTILQLNLKEYNLV	301	3	0.00996678
cation-dependent mannose-6-phosphate receptor precursor	642089134	136	15 kDa	MKVSMSPPHTATPVRLLVLAVQLVLLVCGSQARDDTKRCKLFSESPAERKVLSLLEPLTNKTFSVKTTSDKESYTYQFQVCGDVGKTVGAGLVQIDHTEKKLETVLGLYTVTQAIGGSDWVMLIXXRVYVEGGYMG	136	3	0.0220588
eukaryotic translation elongation factor 2b	642089157	864	96 kDa	MFVLGIVVNFTVDQIRAIMDKKSNIRNMSVIAHVDHGKSTLTDSLVSKAGIIAGSRAGETRFTDTRKDEQERCITIKSTAISMYYELSENDMAFIKQCKDGVGFLINLIDSPGHVDFSSEVTAALRVTDGALVVVDCVSGVCVQTETVLRQAIAERIKPVLMMNKMDRALLELQLEPEDLFQTFQRIVENVNVIIATYGEDESGPMGAIMIDPVIGTVGFGSGLHGWAFTLKQFAEMYVMKFAAKGDAQLGPAERCKKVEDMMKKLWGERFFDPATGKFSKSANGPDGKKLPRTFSQLVLDPIFKVFDAIMNFKKEETAKLIEKLDIKLDNEDKEKEGKPLLKAVMRRWLPAGEALLQMITIHLPSPVTAQKYRCELLYEGPGDDEAAMGIKNCDPKAP…	864	18	0.0208333
60 kDa heat shock protein, mitochondrial	642089387	566	60 kDa	MRPVCRALAPHLTRAYAKDVKFGADARAMMLKGVDLLADAVAVTMGPKGRTVIIEQSWGSPKVTKDGVTVAKAIDLKCKYQNIGAKLVQDVANNTNEEAGDGTTTATVLARAIAKEGFDTISKGANPVEIRRGVMLAVETVIAELKRMSKPVTTPEEIAQVATISANGDVEIGTIISNAMKKVGRKGVITVKDGKTLHDELEIIEGLKFDRGYISPYFINTAKGQKCEFQDAYVLLSEKKISTVQSIVPALELANQNRKPLVIVAEDVDGEALSTLVLNRLKVGLQVVAVKAPGFGDNRKAQLHDMAVATGGTVFGDEAVGIALEDIQAHDFGQVGEVSVTKDDTMLLKGKGDAASIEKRQAQIAEQLENTTSDYEKEKLNERLAKLSDGVAVLKVGGT…	566	5	0.00883392
ATP-binding cassette sub-family B member 6, mitochondrial isoform X1	642089885	650	73 kDa	MLLINEDERDVEGGTGQLLLDGAEESQSTWHDFGQKVRLLVPYMWPRGSMLLQGLVLLCLCLLGLERVINVFVPIYYKNIVNELTDGSSWKTLATTVCVYVLLKFLQGGGAGASGFVSNLRSFLWIRVQQYTNRVVQVRLFSHLHSLSLRWHLGRRTGDVLRSIDRGTSSINSLLSYIVFSIFPTIADIVISIIYFITYFNAWFGLIVFVCMFLYLTLTIIITEWRTKYRRDMNTQDNNAKSKAVDSLLNFETVKYYNAENYEVNRFEDAILKYQISEWKTQASLAFLNQTQNLIIGSGLLAGSLLCAYFVQEGKFKVGDFVLFGTYIIQLYTPLNWFGTYYRMIQSSFIDMESMFKLFTEEEEVKDAVNAGNLLYKLGKVEFENVYFNYTDGKEILKD…	650	9	0.0138462
serpin H1 isoform X1	642090143	405	45 kDa	MWVTVVALCLLAIVASGEDRKKLSSHATTMADQSANLAFRLYHTVAKEKGLDNILISPVVVASSLGMVALGGKASTASQVKSVLSADALKDEHLHTGLSELLNEVSNSKTRNVTWKISNRLYGPSSVTFADDFVKSSKKHYNYDHSKINLRDKRSAVNSINEWAAKSTNGKLPEITKDVQNADGAMIANAMFFKPHWDEKFHENMVDNRGFLVTRSFTVSVPMMHRTGLYKFHDDTENKLFVLDMPLGQKQSSLVFIMPYHLEPLDRLEKLLTRKQLETWMGKMEERAVAISLPKVSVEVSHNLQKTLGELGLTEAVDKTKADFSNISGKKDLYLSNVFHASAMELDIEGNPFDTSIFGSEKLRNPKLFYADHPFIFLVKDNKTNSILFIGRMVRPKGD…	405	1	0.00246914
ATP synthase subunit alpha, mitochondrial	642090809	552	60 kDa	MLSVRVAAALARSLPRRAGFVSKNVAAASVGVNHLHTHRPCLAAKTGTAEVSSILEEKILGADTSADLEETGRVLSIGDGIARVYGLRNVQAEEMVEFSSGLKGMSLNLEPDNVGVVVFGNDKLIKEGDIVKRTGAIVDVPVGEELLGRVVDALGNAIDGKGPLGSSIRRRVGLKAPGIIPRISVKEPMQTGIKAVDSLVPIGRGQRELIIGDRQTGKTAIAIDTIINQRRFNEGKDEKKKLYCIYVAIGQKRSTVAQLVKRLTDADAMKYTIVVSATASDAAPLQYLAPYSGCSMGEFFRDNGKHGLIIYDDLSKQAVAYRQMSLLLRRPPGREAYPGDVFYLHSRLLERAAKMHDNFGGGSLTALPVIETQAGDVSAYIPTNVISITDGQIFLETEL…	552	4	0.00724638
ras-related protein Rab-11B	642090844	217	24 kDa	MGNRDDEYDFLFKVVLIGDSGVGKSNLLSRFTRNEFNLESKSTIGVEFATRSIQVDGKTIKAQIWDTAGQERYRAITSAYYRGAVGALLVYDIAKHLTYENVERWLKELRDHADNNIVIMLVGNKSDLRHLRAVPTDEARAFAEKNTLSFIETSALDSTNVEEAFKNILTEIHRIVSQKQIADRSAHDESPGNNVVDISVPPTTDGQKNKLPCCQSL	217	2	0.00921659
FYN-binding protein-like isoform X3	642091265	281	32 kDa	MQKAREKKEQEAKKKYKLSGPIQVIHKAKARVECKGGKTDLPLTQGETIDIIRITDNPEGRWLARNNEGNYGYVRTEAVGIDYDLIKEQKKGPLPNQSEEKPEVYDDVGILDNACSGVKVQQAEDGDIYDDVDGSNQNRFPPPLPKEGDEIYDDVESQSFTAPPPPLNSLPQLTPKGKQEVMDPKKKKKFEKEEKEFRKKFKFEGEIQVLYDVTIDPTLDSKKWGNKDLQLKPGEVIDVIVKPTYGKLIGRNRDGKFGYVSMVNVAQDGGDVYDDIGESMF	281	2	0.00711744
ectonucleotide pyrophosphatase/phosphodiesterase family member 6 precursor	642091396	440	51 kDa	MSRLSLACAIAILAVLLSGSCLASRKLLVFLIDGFRYDYMDDLQNLPGFKEIMDNGVKVDYMTPDFPSLSYPNYYSLMTGRYCEVHQMTGNYMWDQGSLKEFLIGINPDSRLPMWWDGSEPIWVTMQKLGKKVFMYYWPGCEVEILGVRPSFCEEYVYNPTERNLTDSIERALDGLRSGRADMAAVYYEKIDVEGHHYGPMSSQVKTAVQRLDIAFQVLNQKIKEKDLRDELNVIMFSDHGMTEIKWMEKVIELVTYINMSDVVKMMDRGPVVSLWPKQAKYEEVYRALSSVRNMNVYRRNQVPDRFHYKGGKFVSSLTLVADPGWFITESKSKLPFWQNSSSPEPQGWQHGWHGYDNEFVDMRGFFLAQGPDFKRNVRAAPIRAVDVYNLMCRTLGIL…	440	6	0.0136364
alkyldihydroxyacetonephosphate synthase, peroxisomal	642091626	631	71 kDa	MASNNNSSERQRVAQQRLSRIAAHLHKHEDGNSGIIAKECKIDATGSPEENKGTVPRKRQEIMKWNGWGYSDSKFLFNKKGQAEFTGKRYRLSGMTLPRLQDWFENTFGASVKHKSPATPVLNASVVPPPRLNEAFVENLKATGIPFSNEAEDRVFRAHGHCLHEIFALREGKTFERVPDMVVWPNCHKDVVKIVELACKHNVCLIPYGGGTSVTSALECPPEETRCIVSLDTSQMNRILWLDENNLVAHVEAGIIGQDLERLLNESGYCSGHEPDSMEFSSLGGWVATRASGMKKNVYGNIEDLVIHIKAVTPRGVIEKSCQGPRTSTGPDIHHFILGSEGTLGVVTEVTMKIRPIPEYQKYGSVVFPNFEAGVACLREVAKQRCAPASIRLMDNKQF…	631	16	0.0253566
mis18-binding protein 1 isoform X1	642091653	1023	115 kDa	MGSSAFKPTNINAQKQGPALDAFSPKSQRKALSYPHTLLSSNDTQRPALLKDFKSASQTTNITTPVKRLKSMEDCNGKFKFGAHNIAHDESVFRSKVVLDGLPCLDSRANTFALLKERRRKRDQQDCYQESSRQDPMTGCERSVSTRAQPTVGTGEDASVNVTSSVPTGLSETSIPSRPDAGLSQCEFYHDEPPPRPFPDLVHDPLLQVSPKISIPKKQGAVFRAKHIAESTGSNVTGIHLRHWVLKSRNDRFYVDGVREDNKMPWHSNLIAKRISTTHLKTASGSIYILVGKMAPDFSGTQLPKWLLQKFLFGFPTDWKKYLELFLSEPKGSEGEKGSKGLITPWNQNHLSTKTQDNTFQKPNATRGSARCCATSAVNSANVSRSGRLIKPPLEYWKG…	1023	12	0.0117302
protein RER1	642092130	195	23 kDa	MSEGDSVGESIHGKPSTIGSFFTRVGQIYQSWLDRSTPFSIGRWGVTLSLTAIYMIRVYILQGWYIVTYALGIYHLNLFIAFLSPKVDPSMLDEDEGPALPTKQNEEFRPFIRRLPEFKFWHSATKGIVIAMICTFFEAFNVPVFWPILVMYFIMLFCITMKRQIKHMVKYRYLPFTHGKRTYRGKEETGKPFAS	195	2	0.0102564
rapunzel 5	642092229	394	45 kDa	MTSVAEWLVQNRGKIEKGVEIMGQASAVLAATVGQLHPVLEAVFVASSEILSNPEGQDARYLTEQFSMVNQKLEGIQAEIEQIALELQRTSLNKQNFDREAQMLSQYEKFQDFVNAKPKFKEKKMEKFLSHYENTDTDLNLDALYNAVTGDNTSGDPMLETVVSTEQRSRRAVEDFCARLKKLFVVGIIAVMGYASLKEGVVGDEMVKKWQERMEDVENRMKAAVDDCTENFADQAKLDMEHHLQEKPGSVDLDFTKSLLDTLIKKFDWVSWSIRVFNDKERIFFFNWLAGKKYHGSRGGANYFDVLTKNNIKVVISFSVQPKPINKGQIQQEIEGQKLKGNMMNVAQVLSRSLPNCLVHAVSHYKEVVESNNFQEDCYYYGKHKKAYLCVHPE	394	5	0.0126904
reticulon-3	642092474	202	23 kDa	MNASSTKESTYYVMELVYWRDPKKSAVAFGMSLLVLLSLATFSVISVVSYMLLALLCVTITFRVYKSVIQAVQKSEEGHPFKALMEKDLTVQPEILRKYVDVCLTYVNLAITQARHLLLVEDLVDSLKLAGFMWLLTYVGAVFNGITILILTDIIFFSTPLVYERNKTQIDQYIELIRTRVEVTLAKLQDKLPGAVKRTKAE	202	2	0.00990099
vesicle-associated membrane protein 3	642093442	107	12 kDa	MVICVFKSAPATEGSAPGNRRLQQTQAQVDEVVDIMRVNVDKVLERDSKLSELDDRADALQAGASQFETSAAKLKRKFWWKNCKMWAILIAVIVIILVIIIIWSQSS	107	2	0.0186916
aconitate hydratase, mitochondrial	642093601	782	84 kDa	MATYCLTVARLQLALGQGVRRLHVSAAFNAKAKVSMSRFEPSNFVNYEKLNENVNIVRKRLNRPLTLSEKIVYGHLDDPVGQDIARGRTYLRLRPDRVAMQDATAQMAMLQFISSGLPQVAVPSTIHCDHLIEAQIGGAKDLARAKDINAEVYNFLASAGAKYGVGFWKPGSGIIHQIILENYAYPGVLLIGTDSHTPNGGGLGSICIGVGGADAVDVMAGIPWELKCPNVIGVKLTGKLSGWTSPKDVILKVAGILTVKGGTGAIVEYHGPGVDSISCTGMATICNMGAEIGATTSVFPYNHRMKTYLEKTGRGDIAALADDYADLLVPDAGCEYDSMVEINLDELKPHINGPFTPDLAHPMADIGATAVKNGWPLQVKVGLIGSCTNSSYEDMGRSA…	782	13	0.016624
volume-regulated anion channel subunit LRRC8D isoform X1	642093735	1291	145 kDa	MFSLSELASLSERQGSSKLLKPWWEVFMEYLVVLMLMVSVLSGTLLLSRDRVVCLPLDLTTTPTNQNTSSSTSPLPANPWTPARGRRTHLDYQQYVYISQVCYHEALPWYSRFFPYVALLQSLVLLASGCFWFHFPLTSARIEHFLTILAKCCESPWTSRALSHAARQEEGGEETGPQDLQMPPPTLLASTAAPPSPCPSTLSRTSSLLDRSDGEQARALFERVRRFRSHCEDSEVIYKVYLAQTVFKLLLVVLIVGYTTPLMSSISFTHTCLPQAHALTGYSAFECTHALASVLHKLLLAYISLVGLFGLLSIYTLSWILHSSLRQYSFNKLRELGSMRDVPDLCNDLAFLLHMADQYDPLLAQRLSVFLSPVSETRLLEESLERRWGAERLRSMTTV…	1291	29	0.0224632
protein FAM111A-like	642093940	646	73 kDa	MTSPSNTSNNQQQTPDQSPGADAKTHQGKSSGNQPGTSRQSQNPHIKKEAHDESHSFRYRFGYQQRRVICYTHGTVLDALRTSEMFKNMTKTRQGMEIVIQREKEPRAAVSTHFPCHLIDNEELLTVSFIRVLNGSSSDTRGLYKQSNPPKIQPDKLMTFCVETEGGQNIKTKVMKNAELRKKVKYVCVYGYKGEKVKQALRRDGRFDKTVFKTRCVLSEPETGVDTEMSQPVDGLDGKPLSPQSPTTTDTVKTQLQSKEAGKDGSSLVVKQKKQEIPNSKEILSILRSQYAGLVDHLKERENLKKPSDVQQFLRVEFGKKTQSFQEVKKVKKLMELSASVCQVRIEGTPKGTGFLLFKKFILTNAHVVHQIYEPITNKLQQSVTVTFDFEDLGERTQQ…	646	10	0.0154799
solute carrier family 12 member 9-like, partial	642094290	409	46 kDa	MVINVRNNIKYRRMLCCNLSLFLSLQVRKYLLMLDVRKDHVKFWRPQVLLMVSNPRSSVGLITFINDIKKSGLYVLGHVQLGDLDTLPSDPLQCRYDSWLSLVDHLNIKAFVNLTLADSVRHGVQHLLFISGLGGMRPNTLVLGFYDDCTPKDKLTDPALADDERPPYHFPALRASIDAKEEGNGENGKVMGPQEYVAVIADAMKMMKNVALARYFHQFDRASTISSSPGKGALYVDVWPVNLLRPDSSSYVDTCSLFLLQLACVLNMVRSWRHARLRLFLCVEEGRSLRGSEGKLGQLLKELRIKANVYTVPWDQQVALHWQRQGDDDYVNSFPSNATRLSDEYLSAVNRLILEQAHPPPAVRFLYLPRPPADTRRYTAYLRQLELLTKDLGPTLLIH…	409	7	0.0171149
T-complex protein 1 subunit eta	642094824	545	60 kDa	MMPTPVILLKEGTDTSQGVPQLISNINACQVIAEAVRTTLGPRGMDKLMVDGRGKATISNDGATILKLLDVVHPAAKTLVDIARSQDAEVGDGTTSVTLLAAEFLKQLKPYVEEGLHPQTIIRAFRSATHLAVKKIREISVTVKKDDKKEQRELLVKCAATAMNSKLIAGQKEFFSEMVVEAVMMLDELLPLKMIGIKKVQGGALEESHLVAGVAFKKTFSYAGFEMQPKRYDQPKIALLNVELELKAEKDNAEVRVKSVEDYQAIVDAEWNILYDKLEKIYKSGAKVVLSKLPIGDVATQYFADRDLFCAGRVQEEDLKRTMMACGGSIQTSVGSMTDDVLGRCEVFEEVQVGGERYNFFKGCPRSHTCTIILRGGAEQFMEETERSLHDAIMIVRRA…	545	10	0.0183486
dnaJ homolog subfamily C member 11	642096434	559	63 kDa	MALALEDDEIDNNDYYSLLNVRREATQEELKGSYRRLCMLYHPDKHRDPELKRQAEQLFNLVHQAYEVLSDPQLRAIYDIYGKRGLDVEGWEVVERKRTPVEIREEFERLQREREERRLQQRTNPKGMISVGVDATDLFDRYEEDYEDVPGGGFPHVEINKMHISQSIEAPLTTTDTAVLSGSLSTHNGNGGGNINLALRRVTSAKGWGEVEFGAGDSHGPLLGMKIFRNLTARCFVTAQCGLQFSSRGVRPGCTTVLARHLDKNTMGYLQWRWGTQSSMNTSIVRDTKTSHFTFAMQLGIPHSFMMMSYQYKFQDDEQTKVKGSIKSGFFGTVVEYGAERKISRHSVLGATVSVGVPQGVSLKIKLNRASQTYFFPIHLTDQLLPSAVFYATVGPLIF…	559	6	0.0107335
tyrosyl-tRNA synthetase, mitochondrial	642096844	480	54 kDa	MAAFIARFFSRVSWHGSCIILKNTLPCISLRYTFHRSATTQSGLLFSLNKRGILKDAFPENAAQDQLPQLLQSGCQTVYCGFDPTADSLHVGNLLAIVGLLHFRSAGHNVIALIGGATAQIGDPSGKTSEREQLPSDVVEDNTRAIRDSLQRIFTNHELHFHNDSKKFGTVTLLNNLAWYKDWNVVAFLSEVGRRFRMGTLLSRHSVQSRLKSAEGMSLTEFSYQLFQAYDFYHLNQNHSCKIQLGGTDQLGNLMSGHEFIHKVTGQDVYGLTIPLVTSSAGDKLGKTAGNAVWLNRDKTSPFDLYQFFLRQPDSSVEWYLKLFTFLPLAEVERVMEQQRQEPGKRPAHKRLAAEITKLVHGKEGLESAKRCTNALYHSNLQALEQMSDAELQELFREA…	480	7	0.0145833
high mobility group protein B1	642097006	346	40 kDa	MRRKELSEEFRDKVVDRHRLGEGYKKISHTLSIPLGTVRSIIKKWKVYGTTETLPRSGRPSKISSWAKRILALELTMRPTASLKELQSSMAEMGENVHESTIARSFANCSRYGRSERRRTLQKANSNLQSRAEFAEKYLDIEMGKDPRKPRGKMSSYAYFVQTCREEHKKKHPEASVNFSEFSKKCSERWKTMSAKEKGKFEDLAKLDKVRYEREMRSYIPPKGEKKKRFKDPNAPKRPSSAFFIFCADFRPQVKGETPGLSIGDVAKKLGEKWNNLTAEDKVPYEKKASKLKEKYEKDITAYRNKGKVPVSMPAKAAAPAKDDDDDDDDDDDDEDDDDDDDEDDE	346	4	0.0115607
pyruvate kinase PKM isoform X1	642097534	532	58 kDa	MPGSKSQDMGSAFVQTQQLGAAMADTFLEHLCLLDIDSEPTTARNTGIICTIGPASRSVDMLKEMIKSGMNIARMNFSHGSHEYHGETFKNVREACESFEAGSIHYRPVAIALDTKGPEIRTGLIKGSGTSEVELKKGNMIKLTLDDAYQENCDEDNLWLDYKNITRVVELGSKIYIDDGLVSLQVKEIGEDYLMCEIENGGTLGSKKGVNLPGAAVDLPAVSDKDISDLTFGVEQGVDMVFASFIRKAADVHAVRKVLGEKGKNIKIISKLENHEGVRRFDEIMEASDGIMVARGDLGIEIPTEKVFLAQKMMIGRCNRAGKPITCATQMLESMIKKPRPTRAEGSDVANAVLDGADCIMLSGETAKGDYPLEAVRTQHMIAREAEAAMFHRQVFEDL…	532	8	0.0150376
IST1 homolog	642097651	352	39 kDa	MLGGGFKAERLRVNLRLVINRLKLLEKKKTELAQKARKEIADYLSTGKDERARIRVEHIIREDYLVEAMEILELYCDLLLARFGLIQSMKELDPGLQEAVSTLIWAAPRLQSEVNELKIVSDQLCAKYSKEYGKLCRTNQIGTVNDRLMHKLSVEAPPKILVERYLIEIAKNYNVPYESDAMVRPEVCTGEEADLIDVDSDFKKPGGGGGGGGGFTAGAMPMPMGPPSAFSYPTPKGPMPGPIGFNGPSVGTYDAFNNFQPPMRGGPPPELPSCPPTYQSIDELSIKPSDRSQVSGPGPSSQIYDNNALPELPSVPDTLPTSSFGVGRNTASSDDIDFDDLSRRFEDLKKKT	352	5	0.0142045
proliferation-associated 2G4, a	642098041	412	46 kDa	MSGDDDPQEQTIADDLVVTKYKMGAEIANQALKAVVEAAKAGETVVSLCAKGDAFIMAETGKVFRKEKDLKKGIAFPTSVSVNNCVCHFSPLKSDPEIVLKGGDLVKIDLGVHVDGFISNLAHSFVVGVTKDAPLTGRKADVIKAAHLCAEAALRLVKPGNQNSQVTEAWNKIAKSFKCSAIEGMLSHQLKQHVIDGEKTIIQNPTDQQRKDHEKAEFEVHEVYAVDVLISTGEGKAKDAGQRTTIYKRDPDKQYGLKMKTSRSFFSEVERRFDAMPFTLRAFEDEGKARLGVVECAKHELLQPFNVLHEKEGNHVRRIQQVFIHLTFVAQFKFTVLLMANGPLRITTELYEQELYKSEHEVEDAELKALLQSSASRKTQKKKKKKASKTVETETAPGH…	412	6	0.0145631
uncharacterized protein LOC406277	642098755	360	41 kDa	MVKIFIGNLPREADKDEIQVLFSQYGAVTECAIVKNFAFVHMDDRKSATKAIRSLHLYKLHGTAINVEASRGKNQGAVKLHVTNVEKGNDDELRTLFEEYGTVSECAIVKNFAFVHMDNSDEAMDAIKGLDNIEFQGKRIHVQISKSRPRYEEEDDYPPPPPERGGYWPPRGYPGERHDPPPPSYLRGRHPPPHHGYPAPPPPPPPPRRAPYPERAYERERQSYAVVDYYEKYRARPAPYGIMTYDERRVGSLPPPPPPPSSMVRERFMTSGLDPYERRPLLPPPLRTTXAQFFKFPECLSVSFHNKIFKLILFGHWVDSVLSKQGICTCNVGRLALAFERCNRFGWGEPLVALFLWGGD	360	6	0.0166667
glutathione S-transferase kappa 1	642098822	227	25 kDa	MASSRKVIELFYDVVSPYSWLGFEVMCRYRNVWNIDLKLRPAFLGGIMQGSGNKPPGLVPNKFLYMTTDLHRLAQYFQVPISPPADPFEAMFEKGSLSAMRFVAAVQEREVGGDKQVEQVSRELWMRIWSQDKDITQPASLSEAAMKAGLSASEVEELLKLSTSKEIKDKLKRSTQEALDHRAFGFPLAVCHVNGKAEVFFGSDRFELIADCIGEKWMGPQPAAAKL	227	3	0.0132159
topoisomerase (DNA) I, like	642099084	750	89 kDa	MSGDHSHNDSQIDSSSRVNDSHKHKDKYKDKEHKHKDHKKDREREKSKYGNSDHKEFSEKKHREKERIKHEDVSTDRHKDKHKEKDHRKDEIKPKKEKENGFASPHRIKTEPDNDHFYHSPKSLKRQRDNDETEFKPKKIKIENDRVDKKAKKRKQDEDIKPKKTQKNKKGEVADGKKKAKKEPEEKWKWWEEERATDGSKWRFLEHKGPVMAAPYEPLPSKVRFFYDGKQMKLGPEAEEVATFFAKMLDHEYTTKDAFRKNFFKDWRKEMTSEEKSKITDLKKCNFNEMGEYFKAQSEARKAMTKDDKLKIKVENERLLQEYGFCIMDNHKERIANFRIEPPGLFRGRGDHPKMGMLKRRIRPEDIIINCSKDSKHPKPPPGTKWKELRHDNKVTWLV…	750	8	0.0106667
ras homolog gene family, member Ac	642099128	193	22 kDa	MAAIRKKLVIVGDGACGKTCLLIVFSKDQFPEVYVPTVFENYVADIEVDSKQVELALWDTAGQEDYDRLRPLSYPDTDVILMCFSIDSPDSLENIPEKWTPEVKHFCPNVPIILVGNKKDLRNDEHTRRELAKMKQEPVKPEEGRDMANRINAFGYLECSAKTKDGVREVFEMATRAALQAKKRGKKNACLLL	193	6	0.0310881
DDRGK domain-containing protein 1 precursor	642099281	303	35 kDa	MDIVVYLIAAAILIVLIVFAVKVRGKTEEADREQRQDVLARVAAPRPQVAEERGAGMPRRRRNLNSRVMAQRRAQRDASDNEDSPVEEVAVEEQEEEEEQQFQATGKLGAKKQRKLEEKQAKRAQREAELAEREERKKMQELREQERSKEDEKERQQEQKEEEEERRAKEEQEKEEEEEYLRLKQSFVVEEQGEADDVTEEESRNLLQEFIQYIKDSKVVLLEDLASHFGMRTQDAIARLQDLLADGELTGVIDDRGKFISITPEELNAVAQFIKQRGRVSISELAQASNSLINLTPEIRNTA	303	0	0
calnexin isoform X1	642099708	586	66 kDa	MGVDDELEDLGLGEELLDGEVEPEDADTPPGPPPAPKVTYKAPEPMGEHFFAESFDRGTLDSWVLSKAKKEDIDEDIAKYDGKWEVEDMKDSKLPGDKGLVLKSRAKHHAISAQLLRPFIFDTKPLIVQYEVNFQQGIDCGGAYVKLLSQTPDLNLDEFVDKTPYTIMFGPDKCGEDYKLHFIFRHKNPKTGEYEEKHAKKPDSDLRTYYTDKKTHLYTLVVNPDNSFEVLVDQTVVNSGNLLTDMTPPINPAAEIEDPDDHKPDDWDERPKIQDPDAVKPEDWDEDAPKQIPDEDAVKPDGWLDDQPEYTSDPDAVKPEDWDEDMDGEWEAPQIPNALCETAPGCGAWQRPMIDNPNYKGKWKAPMIDNPNYQGVWKPRKIANPDFFEDLHPFRMTPF…	586	5	0.00853242
atlastin-3 isoform X1	642100065	516	58 kDa	MGSEPGPVQIVTVCKEDHSFALDTEALGRVLLAPEVRDKHVVVLSVAGAFRKGKSFILDFMLRYMYRKKHGEEWLGQDDEPLTGFKWRGGSEPETTGIQLWSEVFLVEKSDGTEVAVLLMDTQGAFDNQSTVKDCATIFALSTMTSSIQIYNLSQNIQEDDLQQLQLFTEYGRLAMDEIYLKPFQACEPKSLMFLIRDWSFPYEYKYGLNGGREFLDKRLQVKETQHEELQTVREHIHSCFTSINCFLLPHPGLRVATSPAFKGQLSDVAPEFKKELRNLIATLLHPNCLAEKEINGNKVTCRGLLEFFKAYIKIYQGEDLPHPKSMLQATAEANNLAAVAGAKDQYYKNMEKVCGGDLPYVAPASLEEKHHFFLQESLHVFSSTKKMGGQEFCDRYRD…	516	12	0.0232558
heterogeneous nuclear ribonucleoprotein A0, like	642100567	256	27 kDa	MDAANQLCKLFVGGLNVDTDDDGLRKHFEQYGQLTDCVVVVNKQLQRSRCFGFVTYSSGEEADAAMAARPHVVDGTNVELKRAVAREDAGKPEALAKVKKIFIGGLKDDIEDEHLNDYFSQFGEIEKAEVIAEKETGKKRGFGFVHFTDNDSADKAVVVKFHTINGHKVEVKKALTKQEMQAGEVVTTATGAVSVGATEAIAAGMAAATEVEAMAVVMEAQATEVATATRWEVMVAAMATVTLAVGTASSPPGMGP	256	3	0.0117188
ADP-ribosylation-like factor 6 interacting protein 5	642100605	191	22 kDa	MARMELAPLRPWDDFFPGADRFAKPDFADLAKWNNRVISNLLYYQTNYFAVAIVVFLVVGFLNPLGMFLGGAVVSLVFMVSVWAGENKNFIKNFKKKNPTLFVIAVMGTSYFLLSLCGGVMVFIFGITFPLLLILVHASLRLRNMKNRLENKIEGVGMKKSPMGIILDLLDQQEEKINKIQDFLESKLNKE	191	1	0.0052356
GTP-binding protein SAR1b	642102233	198	22 kDa	MSFIFDWIYSGFSSVLQFLGLYKKSGKLVFLGLDNAGKTTLLHMLKDDRLGQHVPTLHPTSEELTIAGMTFTTFDLGGHAQARRVWKNYLPAINGIVFLVDCLDIPRLAESKTELDALMTDETIGNVPILVLGNKIDRHEAISEERLRELFGLYGQTTGKGNIPMKELNTRPLELFMCSVLKRQGYGEGFRWLSQYID	198	2	0.010101
glutathione S-transferase pi	642102539	303	35 kDa	CIYIYIYVYIHIYIRIYIYVYIYICICICVYICIYTYIYIRIYIYVYIYICICICICVYICIYMYICVCVCGWMYIFISVFSCNELTHVLYLLFPVGPYTITYFGVRGRCGAMRIMMADQGQEWKEILIDFADWTKGDLKASCVFGQLPKFEDGGLVLYQSNAILRHLGRNHDAYGKDGKEAALIDMMCDGVEDLRLKYVKMIYQEYDTGKDQYIKDLPNHLDKFEAVMAKNKTGFLVGNKPSFADYGLFEVLLNHLVLCSSCLDTSPSLKSFVEKMSARPKIKAFLSSDAYKKLPINGNGKQ	303	19	0.0627063
plectin isoform X2	642102890	4361	496 kDa	MSPNLAGKRVRRRWLSARSTDTGGWTQPRRKAPLTGRQGSEVARWPPSRASWESQAQPPLWKGRGFRTEASMMEESQGKRASTVTFSQTTEASSSKAGVSSQETIITKVRAERSQVVPVQKNYTSTHESQVSIKSVSSKTAFPLAVTAVASAAGAGAALVKVSAESSFNKAGIEKPKKAAAVEEAPNVSAEPVPSKPAIPAPLPPTKEIKEEKKTEVKVTPEPKKASEMTVPQETPKLSTEPTKSFKVEITDPLSVVSGKDSVVTEKVIETKKGMIEDCSKSKKKKKSPRETTKAESPVTKVSPEKGLKTTEEETQEPPKPPPAFASSIKPKGPESTKETKAEVRRETKAEVQKSNEADHQIPKPAVEQSNTKSIVSQAASHPVAAPQVQEKAETTNKV…	4361	25	0.00573263
NADP-dependent malic enzyme, mitochondrial	642102998	541	60 kDa	MAFTLQERLQLGIHGLLPPVFLSQDVQVLRIMRSYEGRNPLDKYILLMTLQDRNEKLFYRLLTSDVEEFMPIVYTPTVGLACQQYGLAFRRPRGLFITIHDKGHIATMLNSWPEENIKAIVVTDGERILGLGDLGSYGMGIPVGKLALYTACGGVPPQQCLPVLLDVGTDNQALLEDPLYIGLKHKRVRGKEYDDLIDEFMQAVTDKYGMNCLIQFEDFANSNAFRLLNKYRNHYCTFNDDIQGTASVAVAGVLAALKITKNKLSDHTFVFQGAGEAALGIAHLLIMAMAKEGVSATDAAKKIWMVDSRGLIVKGRGNLNHEKEEFAHDHAHIKTLEEVVHTIKPTAIIGVAAIAGAFNENIIKDMASFNERPIIFALSNPTSKAECTAEHCYQLTEGR…	541	8	0.0147874
brain protein 44	642103002	129	14 kDa	MAAMRVSYHKLLDKIGLMLPAKLRPLYNHPAGPKTIFFWAPMFKWGLVGAGLADMSRPAEKLSFSQSAVLTATGLTWSRYSLVIIPKNWNLFAVNLFVGSAGISQLYRIFQYEQGKKALAKEEAAPAES	129	0	0
aconitate hydratase, mitochondrial	642103654	793	86 kDa	MASYCMTVTRLRLVLGEGARRLHVSAAFNAKPKVAMSRFEPGTSISYEKLHENIDIVRKRLNRPLTLSEKIVYGHLDDPVGQDIARGRTYLRLRPDRVAMQDATAQMAMLQFISSGLPKVAVPSTIHCDHLIEAQIGGVEDLKRAKEVNQEVYNFLATAGAKYGVGFWKPGSGIIHQIILENYAYPGVLLIGTDSHTPNGGGLGSICIGVGGADAVDVMAGIPWELKCPNVIGVKLTGSLSGWTSPKDVILKVAGILTVKGGTGAIVEYHGPGVDSISCTGMATICNMGAEIGATTSVFPYNHRMKTYLNKTGRADIAALADEHKDDLVPDKGCKYDHVIEINLSELKPHINGPFTPDLAHPVSEIGAVAEKNGWPLEVKVGLIGSCTNSSYEDMGRAA…	793	12	0.0151324
glutamine--tRNA ligase	642103713	772	88 kDa	MADPLTLFTSIGLSEQKAKETLKNDALCSALKDAIAQAQRVLGAAGVDKATGTLLYTMTSRLRDPKRLGFLTDHIAQRKICTELQLAAALEFVKSHPQDPINQQEFESLCGVGVVITPEQIEDKVEKVIKKHKDQLLLERYRFNMGLLMGEARGGLMWADGKMIKNEVDMQVLHLLGPKTEADLEKKTKAQKAKAPDGVKEELTINGELKIEGRSLMDELRGVALNFHKPGENYKTEGYVVTPKTMDLLKQHLEFTGGQIRTRFPPEPNGILHIGHAKAINFNFGYAKANDGICYLRYDDTNPEKEEEKYFTAIKDMVEWLGYKPYEITHASDNFQRLYDLAVDLIRRGHAYVCHQRGEELKGHNPPPSPWRERPVEESLVLFDRMRRGLFAEGEATVR…	772	16	0.0207254
tricarboxylate transport protein, mitochondrial	642103939	324	36 kDa	MPSIQPQQRRHKPLTELVCCSRWSRGNRDPPNDHNFSVSPFLSLGGIAGGIEICITFPTEYVKTQLQLDEKANPPRYKGIVDCVKQTVDGHGVRGLYRGLSSLLYGSIPKAAVRFGVFEFLSNKMRDESGKLDSTRGLLCGLGAGVAEAVVVVCPMETVKVKFIHDQSSANPKYRGFFHGVREIVRTEGLRGTYQGLTATVLKQGSNQAIRFYVMTSLRNWYKGEDPNKAINPLVTGAFGAFAGAVSVFGNTPLDVIKTRMQGLEAHKYKSTLDCAVKIMKHEGPKAFYKGTVPRLGRVCMDVAIVFIIYEEVVKVLNKVWKTD	324	8	0.0246914
voltage-dependent anion-selective channel protein 2-like	642103940	399	43 kDa	MTAYSGHTRTTLGLWDSKSGNYSDAYCSEVQCLRPLRHSGALHKLLAAFYTNTSLDPILVIHALAPVNCACSLRLLHCALSLPSKFFVLVGGRELKYASFDRVKEEQCSDASQHNIGAMAVPPSYSDLGKTAKDIFSKGYGFGIVKLDLKTKSQSGVEFNTSGSSNTDTGKAAGNLETKYKMKELGLSFNQKWNTDNTLATEVTVEDQLAQGLKVALDTSFVPNTGKKSGKLKTGYKRDFLNVGCDVDFEGPIIHAAAVVGYDGWLAGYQMAFDMAKSKLAQNNFALGYKAGDFQLHTNVNDGTEFGGSIYQKVDDKLETAVTLAWTAGSNNTRFGIAAKYALDKDASLSAKVNNASLIGVGYTQTLRPGVKVTLSALIDGKNFNTGGHKVGLGFELEA	399	7	0.0175439
proliferation-associated 2G4, a	642104328	393	44 kDa	MSDNEEQEQTIAEDLVVTKYKMGGDIANQALRVVIEAAKSGVSVVNLCEKGDAHIMVETGKVFRKEKDLKKGIAFPTSVSVNNCVCHFSPLKSDPDYTLKDGDLVKIDLGVHVDGFISNVAHSFVVGATKEAPVTGKKADVINAAHMCAEAALRLVKPGNQNSKVTEAWNKIAQSFKCTAIEGMLSHQLKQHIIDGEKTIIQNPTDQQRKDHEKAEFEVHEVYAVDVLISTGEGKARDGGQRTTIYKRDPSKQYGLKMKTSRMFFSEVERRFDAMPFTLRAFEDEAKARLGVVECAKHELLQPFSVLNEKEGEFVAQFKFTVLLMANGPHRITSGPFEPELYKSEHEVQDAELRTLLQSSASRKTQKKKKKKASKTVETATGQPTEESKKVAE	393	6	0.0152672
carnitine O-palmitoyltransferase 2, mitochondrial	642105049	665	75 kDa	MANLLTMQFCATLRKPGNLKPLRSTSTALTNKRSYSSEDREYLHRSIVPTMHYQKSLPRLPVPKLEDTIKRYLAAQRPLLDDDQFSTTEKLARDFENGVGKQMHEELVAQDKQNKHTSYISAPWFDMYLSARDSVVLNFNPFMSFNPDPKTEYNNQLVRATNMVASAVRFMKTLRAGLLEPEVFHLNPAKSDTDSFKKLIRWVPSSLSWYGAFMVNAYPLDMSQYFRLFNATRIPKQGKDELFTDPKGRHLLVMRGGNMYVFDVMDRDGNLVEPAEIQAHLKHILSDPTPAAAHPLGLLTSENRDTWARLREKLLATGNGEVLGLVDSALFCLCLDDENMNDHIHISHNMLHGDGTNRWYDKSFSIIMAKCGNAAINFEHSWGDGVAVLRFQNEVFKDS…	665	9	0.0135338
glyceraldehyde-3-phosphate dehydrogenase 2	642105560	335	36 kDa	MSDLCVGINGFGRIGRLVLRACLQKGIKVVAINDPFIDLQYMVYMFKYDSTHGRYKGEVSMEDGKLIVDDHSISVFQCMKPHEIPWGKAGADYVVESTGVFLSIDKASSHIQGGAKRVVVSAPSPDAPMFVMGVNEDKYDPSSMTIVSNASCTTNCLAPLAKVIHDNFGIEEALMTTVHAYTATQKTVDGPSAKAWRDGRGAHQNIIPASTGAAKAVGKVIPELNGKLTGMAFRVPVADVSVVDLTCRLSRPGSYAEIKAAVKKAAEGPMKGYLGYTEDSVVSSDFIGDTHSSIFDAGAGISLNDNFVKLISWYDNEFGYSHRVADLLLYMHSKE	335	6	0.0179104
protein bassoon-like isoform X1	642105658	2451	267 kDa	MSLFVLSVFQNKEWLCLNCQTQRALSGALGDTPLPAPQPMGSPRHPAPANQLQPQQRGLNQQAGLRPTGPQQQQKPPGAQVSGPPFSPAKQAGPTAQSKGPAQPSPAKAQPSPAKTAQPSPAKGEPSPAKQTGPTTQSKGPAQPSPAKSAPSPAKQTGPTTQSKGPAQPSPAKGAPSHTKAASTPSKGAPSPAKGAPTQPKPNQSVPNKQSGKQQQGQDKTKVATKTQKEAEVKASPKKGAPETITTSKDERKKPAGDSQKSKHHDYSNKSSTQSLSDTGYSSDGISGSMGEITGQIQEDPGLKLSERGPSSPSEITKLESSMRPLLESKSKEAADQGRGRPHSLSIGQDEEYNSDGEVSDDLSSKLRHDYVEDSSESGLSPLPPRQKKSHKEMTDEEF…	2451	18	0.00734394
E3 ubiquitin-protein ligase RNF213 isoform X1	642106085	4233	485 kDa	MSRVVRCSVFCPRCRVPGRSTKVLRDPXSTVFCGCSCFSEAYGRECLATAVKLFEKICKGVRSTSTYTQNFTDIPVACMNMVVSISEFARAFESQATKDVEREHMHAKELDLLSEAMVIVRSWIGTTFRDRLLARSVTTLYLSVNVTTEIEMWNNIISLKFANDDFTKEWRQTFTRDLEGKLKQESPLDQIEIYCSKIEVLNESHPHVAKTIEKCALEAVTSLCQSKSEGKLFDRLKINYKFGKLISTIIQKSWPRDERGDYHEDDDVVFQHLLSWTAAKNIFQLHGADEKLIEQLSEEARDRMAIAISSFTAISNQLVHGNIRIKLLNSVLEKRDTFTELLKIDCLSENERYKDSAPMKRLLMCRQEEVKAVYHEKELVEVLLTMSRKLQEHVVVQFE…	4233	119	0.0281124
guanine nucleotide-binding protein G(I)/G(S)/G(T) subunit beta-1	642106774	340	37 kDa	MSELDQLRQEAEQLKSQIRDARKACADATLSQITANIDPVGRIQMRTRRTLRGHLAKIYAMHWGTDSRLLVSASQDGKLIIWDSYTTNKVHAIPLRSSWVMTCSYAPSGNYVACGGLDNICSIYNLKTREGNVRVSRELAGHTGYLSCCRFVDDNQIITSSGDTTCALWDIETGQQTTTFAGHSGDVMSLSLAPDTRLFVSGACDASAKLWDVREGMCRQTFTGHESDINAICFFPNGNAFCTGSDDATCRLFDLRADQELMCYSHDNIICGITSVAFSKSGRLLLAGYDDFNCNVWDTLKADRAGVLAGHDNRVSCLGVTDDGMAVATGSWDSFLKIWN	340	16	0.0470588
kinase D-interacting substrate of 220 kDa isoform X3	642107249	1764	194 kDa	MDTTTSIKMTTLAIQNLFGYVEEENLAALKAHLDKFKEVDGRSDNGQTPLMLASEQGSIEIVQELIRRGANVNLDDVDCWSALICAAKEGHVEVVKELLESSAYIEHRDMGGWTALMWAAYKGRVEVTEVLLENGANPNTTGQQYSVYPIIWAAGRGHAEIVQVLLENGAKVNCSDKYGTTPLIWAARKGNFDCVMHLLENGADVDQEGANSMTALIVAVKGGFPEVVKELLKRNPNVNMTDKDGNTALMIAAKEGYTEIVQDLLDAGTYVNIPDRSGDTVLIGAVRGGHVEIVRALLHKYADIDIRGQDNKTALYWAVEKGNATMVRDILQCNPDTETCTKDLESPLIKATKMRNIDIVELLLDKGAKVSAVDKRGDTPLHIAIRGRSRRLAELLLRN…	1764	27	0.0153061
splicing factor U2AF 35 kDa subunit	642107271	239	28 kDa	MAEYLASIFGTEKDKVNCSFYFKIGACRHGDRCSRLHNKPTFSQTIALLNIYRNPQNTAQSADGLRCAVSDVEMQEHYDEFFEEVFTEMEEKYGEVEEMNVCDNLGDHLVGNVYVKFRREEDAEKAVMDLNNRWFNGQPIHAELSPVTDFREACCRQYEMGECTRGGFCNFMHLKPISRELRRELYGRRRKRGGGHHSRSRSRERRSRSRDRGRGGGGGGGGRDRERRRSRDRERSGRF	239	9	0.0376569
annexin A1	642107312	348	39 kDa	MKYMHGLVLTFATMSFLQQTVYLGMADESTLLNQGTVTPYPHFSADGDAGILDKAIKAKGVDENTIIDVLVKRSNAQRQQIKASYQKASGKPLETALKSALNGELEDVVLALLKTPAQYDAQQLRLAMKGLGTDEDTLIEILASRTNKEIKEIKKAYQEEYKNELQNDIKSDTGGDFRNALLSLCKATRNEDIIVNQELAESDAKALYEAGEKRKGTDCSVFIDILTTRSAPQLRQAFEKYFKYSKVDVTKAIDLELKGDIENCLTAVVKCAGSKPAFFAERLNLAMKDKGTRTKILTRVMVSRSEVDMARIKQEYKKTFGKTLYQDILNDTNGDYEKILLALCGSDS	348	5	0.0143678
lipase maturation factor 1	642107647	402	47 kDa	MWLIPFHLLRWESQLLETGFLGIFLCPVWSLSQVPPRCPPSLISIWTFRWLIVRIMLGAGLIKIRGDRCWRDLTCMDYHYETQPVPNPMSYYMHQSPWWFHRFEVLSNHFIELIVPLFTFLGRRMCMVNGTLQIVFQVTLIVSGNLSFLNWLTIIPSLACFDDASLGFLFSSGRGAKQAVLDLQAEEAAGWTPKPTRGMLFRRVVNVALGVLIGYLSVPVVLNLLSSKQVMNTSFDPLRIVNTYGAFGSITKERTEVILQGTMNEDPKDPEAVWEEYQFLCKPGELTRRPCLISPYHYRLDWLMWFAAFQTYEQSEWVIHIAGRLLANDTSILSLMEYNPFQGRDNPRWVRGEHFKYRFTLPGSGPQGKWWVRKRIGAYFPAVDLVALRGYFKSRNWPH…	402	8	0.0199005
dolichol-phosphate mannosyltransferase subunit 1	642107734	250	28 kDa	MASRKGSQQSRGDGDKYSVLLPTYNERENLPLIVWLLVKYFGESGYEYEIIVIDDGSPDGTLEVAEQLQKIYGEDKILLRPRAKKLGLGTAYIHGIKHARGNYVFIMDADLSHHPKFIPEFIKKQREGGYDLVSGTRYRGDGGVYGWDLRRKLISRGANYVTQVLLRPGASDLTGSFRLYKKEVLESLVERCVSRGYVFQMEMIVRARQLNYTIGEVPISFVDRVYGESKLGGNEIVSFLKGLLTLFATT	250	1	0.004
ubiquitin carboxyl-terminal hydrolase 19 isoform X3	642107743	1413	158 kDa	MKKLFHPPFEKLKLYVFVDWKQNANEVTVRLRCGEGVQSVEDVTTTFTDTDCQACFPDGRQWDCHLHEEIEGSCSKVQYKEKYGFLLLVMHKKIPFHSWPSLKQTKKEKEPVNVQAKNGKEQKPPPVVKPEKSVPETADKPKLSTQPSAPPAQSEQRRGKVERGVKRTMKNKPAADRPESGVKATEDEETKPLSKGDLLQEPSAKRTVCPSKDPTSQTPRDTHPKSTANGKPHTTTPTGRDPQTYTAGDNRAERLGNVHECTTPEIAICHTQQEMKVQLEKSPESDFKARAGEERIPSATVSSAVSSHKALDSTNRTERQGEAEAERTESSTVVRKSKDGADQATLTPTQQSGSREPVTATPSKQAEFTSSTEEEKKDQSKEEPLEIKQLEAVPEPMVN…	1413	32	0.0226469
microtubule-actin cross-linking factor 1 isoform X20	642107931	6345	706 kDa	MQYVVSGPITSCSFLNRLWVAGVTELHSTVPGGQMVVRLCLTRLSFIAISSNIHLLCFSSQSQAVIGGVIDLGTMETVPVFQAAQRGLIDQDTCHVLLEAQLTMGGLFQPVSPVSLSLEEGFNCGLIDSLISQSLAELESALHLVDQTEQLEGQLLPVAAAMEEGLIREELGLRILELQMNTGGLRELGGRRLTLDSAGEMGLLTPRVYTKLRSRVNRRELVDPNTAEKLNLSELQQRCVLSDDTGLYLLPVKQQPGGTVCLASGRKVGIFRAVQENLIDRQVTVRLLEAQLFAGGIADPRTGRRLTVDEAVRHNLMDQDLACAMLTRQLQSGGILDPVSGERLGLEEAIQRDLLSPHLALLVLESLWAFMGMLWPESGELLPIAEALQQGVISGELAL…	6345	56	0.00882585
heterogeneous nuclear ribonucleoprotein Q	642107997	499	56 kDa	MWCSGYADVYALLERTGYTLDVTTGQRKYGGPPPEEVFQGAQPGIGTEVFVGKIPRDLYEDELVPLFEKAGPIWDLRLMMDPLSGQNRGYAFITFCGKDAAAEAVKLCDNYEIRSGKYLGVCISVANNRLFVGSIPKNKTRESILEDFGKVTEGLQEVILYHQPDDKKKNRGFCFLEYEDHKSAAQARRRLMSGKVKVWGNPVTVEWADPVAEPDPDVMAKVKVLFVRKLATPVTEELLEKTFSAFGKLERVKKLKDYAFVHFEDRDAAVKAMAEMNGKELGGEEIEIVLAKPPDKKRKERQAHRQTTRNPGYDDYYYYPPPRMPPPGRGRGRGGRGGYAAYPPDYYSYEDYYDDYYDYHDYRGGYEDPYYGYDDVYSMRGRGSRPSRGGPPPPRARGA…	499	5	0.01002
secretory carrier-associated membrane protein 3	642108004	348	38 kDa	MSKYTSFPEPGDDHNPFQDPAVTQHSSNTEYATLDLYNPFDNKNGPPPPAYAATAPSAPQPVVPATTPPNRTTPTEPRNYGTSFTPQQTAVNATTAELLRKQEELEKKARELERRERELDSHALGPGATRQNNWPPLPTFCPVGPCFYQDINMEISQSFQHTVSIMYYYWMFTACTLAFNLISCLSLFCVEPSGGVGLGLAILWVLLFTPCSFVCWYRPVYKAFRSDSSFNFFAFFFIFFVQVIFYVIMTIGIPGWGFSGWIVSLAALKTSVPVGVIMMLNAILFTAQAAMGVVLLKRVHSLYRQTGASFVKAQAEFATGVMSNQAVRQAAANATASAAQGAFTSAAR	348	7	0.0201149
atlastin-3 isoform X1	642108626	511	58 kDa	MGSEPGPVQIVTVCKKDHSFALDTEALGRVLLAPEVRDKHVVVLSVAGAFRKGKSFILDFMLRYMYRKKHGEEWLGQEDEPLTGFTWRGGSEPETTGIQLWSEVFLVEKSDGMEVAVLLMDTQGAFDNQSTVKDCATIFALSTMTSSIQIYNLSQNIQEDDLQQLQLFTEYGRLAMDEIFLKPFQSLMFLIRDWSFPYEYKYGLKGGSEFLDKRLQVKETQHEELQTVREHIHSCFTSINCFLLPHPGLKVATSPAFKGQLSDVAPEFKEELRNLIPTLLHPDNLAEKEINGNKVTCRGLLEFFKAYIKIYQGEDLPHPKSMLLATAEANNLAAVAAAKDQYYKNMEKVCGGDLPYVAPASLEEKHHFFLQESLHVFSSTKKMGGQEFCDRYQDQLEAE…	511	10	0.0195695
alkyldihydroxyacetonephosphate synthase, peroxisomal	642109569	280	32 kDa	MKIRPIPEYQKYGSVVFPNFEAGVACLREVAKQRCAPASIRLMDNEQFQFGHALKPQVSSIFTNFVEGLKKFYITKFKGFDPHQLVVATLLFEGDRERVLQHEKQVYDIAATFGGLAAGEDNGQRGYILTFVIAYLRDLGMDYYVVAESFETSVPWDRVLDLCRNVKERINRECKERGVQFQPLTSCRVTQTYDTGACVYFYFAFNYRGLADPVHTYERVEHAAREEILANGGSLSHHHGVGKLRKEWMKESISSLGVGMLQSVKDYVDPDNIFGNRNLL	280	6	0.0214286
SUN domain-containing protein 1	642109675	617	69 kDa	MRRMLSVLWLAAVSPGKSATGAFWWLGTGWYHLATVMSLLNIFVLTRCLPKLLKLLLILLPFLLVLLALWHWGPSSLLSVLPAINITEWRTAYSFSQTPLEPTKDSQPIMAQPPPTVSQVEVILMLPGSVLVSVDSERLARLEERLAQLWEKVERGGRRQENQHREVLSLYQSVREQLDTQTDKDSMGLWVSGLLEERLLLLKRGMEKDAALRRELSQEIGEQYVVQQQGQESRLAQLEVLLQTLTAKTEEVQRRQADTSSATPALPPVPVQANVGVDSESRDALLAEVQLLEATLGGIRQDLQGVMGCQGMCDRLDTLHETVSEQVSAQVRTELRALFSRSEQVGDSQTGEKELPESLLQWLSERYVSGADVHASLTSLELSILQNVTLQLEKSRARQ…	617	6	0.00972447
protein disulfide-isomerase A6 precursor	642109902	448	49 kDa	MRLLLAPSYFPPALLGCSLVFMVQGFYSASDDVVELNPSNFNREVLQSDSLWLIEFYAPWCGHCQSLTADWKKTATALKGIVKVGAVDADQHNSLGGQYSVKGFPTIKIFGANKNKPDDYQGGRNSQAIVDGALNALHTLVKDRMSGRSGGSDYSRQSGGGGGGSKKDVVELTDDNFDRLVLNSGEVWLVEFFAPWCGHCKSLEPEWAAAASAVKEQTKDKVHLGAVDATVHQGLASRYGIRGFPTIKIFKKGEEPEDYQGGRTRGDIIAGALDLFSDNAAPPELLEILNADVLKKTCDDYQLCVIAVLPHILDTGAAGRNGYLEVMMKMAEKYKKKMWGWLWTEAGVQMELEASLGIGGFGYPAMAAINARKMKFALLKGSFSETGIHEFLRDLSVGR…	448	7	0.015625
alpha/beta hydrolase domain-containing protein 14A	642110807	265	29 kDa	MNFLRNRLVVLGLVLLATVLLYLLLPSIRQGSMEPSLDVQRMGLVAVSPPPPPAINVSVRTGQLPGDPPLFFREALPVDGSGRQILPRLQVVLLHGQAFSSKTWEELGTLALLATNGYQALAVDLPGFGNSPDSDAVKTDQHRVDLLGRFMEALGVRTAVLLSPSMSGHYSIPFLMKHSAQLHGFIPIAPVGTRSYTPQQYQSIQTPTLIVFGALDTNLGAQSHKNLMQLPHHSVLKMEGARHACYMDKPWEFHQALLDFLSKLE	265	1	0.00377358
alpha-galactosidase A	642111070	408	46 kDa	MGAVVLVLFTIGVFISPVKSLDNGLALKPTMGWLHWERFMCNVDCDTDPNNCISENLYMQMADVMVTEGWKEAGYEYVCIDDCWPSHQRDAKGRLQADPKRFPRGIKKLADYVHSKGLKLGIYADLGTFTCGGFPGSMGYYDIDAQTFADWGVDLLKFDGCYMKWTLLGEGYTNMSIALNQTGRSILYSCEWPLYEWPHHQPDYAAIRKACNHWRNFADVYDSWDSVKTILDWTADHQDVIVPAAGPGGWNDPDMLVIGNFGLSHTQQESQMALWAIMASPLLMSNDLRDICPRSKQLLQNTRIIAISQDPLGRQGYRTAKVDSFEVWERHLSGGRLALAVMNKQEIGGPRGFPLTLATLPSWKICHPQCNVTQVLPSYKELGVQTLLSKLVVVVNPSG…	408	12	0.0294118
uncharacterized protein LOC563587	642111295	419	47 kDa	MDSDILNIEEIVMGKGPPDPPAELTTEKPAEPYKPISSFKAPPPPTIQPYQHENLQCFQCFITFCNSKAKERHMKKSHREEYKQQLQQGDTLFTCYVCDRTFPSSEELTQHQGSHNKEDKPFKCPHCQESFRTFSELTTHRRQVCPERQFVCKDCSETFRSPALLRTHRLAQHPRPEAEVDEPDDPTKTHRCGKCNRGFETESELIMHQENHAGDQHCNGSASPAKKRGRPFKAEDATVGEKKGKRRKKKEEGTEEAETGNNAEEAAAAPAETKGKAAAAAGGGRRGRPKAAAGEEAREDDSEAPAEEKKPKAAPAPPKQHPCPECELTFPALAQLRAHKKEKHTPRKAHPCEECEESFARPEQLEAHKNRAHTKGRYACPTCGKSFGRESNLKGHQQS…	419	19	0.0453461
uncharacterized protein LOC100001340	642111403	329	36 kDa	MASGPPQTELRLVLLGGTRAGQSAAGNAILGRQAFLTQTASEPAVTQECEKHRGIIAGRWVSVVVAQDWFCSERPPEEVRHHVSSCVALSAPGPHGFLLCVPVDRPADMELRALEALEKVFGPTAVCGHTLVLFTHTDQMVLGQQLDEYITTRRKDLLELVVMCGDRYHSLERRSRGEKDERKSVEELLEKVEQTVKESGVEFYSCPLYQEAEARVPSSASPPEQELDDEEMARVREEAERSVHNLNIDTEGITSLSPASSSPSFLSSLWQGLTGWLRRLPKMLRMESLLGAFVGLFVGGPVGRMLGATVGSVATEVGRRKTPKTEKTK	329	7	0.0212766
sodium-coupled neutral amino acid transporter 5	642111511	475	53 kDa	MELQKLSNGLHHGFVPFEDGIPQAEEEEEMLPHKSDGTKKPQFTDFEGKTSFGMSVFNLSNAIMGSGILGLSYAMSNTGIVLFIILLICIACLSSYSVHLLLKSAGVVGIRAYEQLGFRAFGHPGKIAAGVIITFHNIGAMSSYLFIVKYELPLVIQAFLGLSSNTGEWFLNGNYLILIVSVCIILPLALMRQLGYLGYTSGFSLTCMVFFLSSVIYKKFNIPCPLVPYGRNHTTIINTTVEEGQCEGRMFTINQETAYTIPILAFAFVCHPEVLPIYTELKNATKRRMQGIANVSIMGMFVMYLLTAIFGYLTFYVNTESELLHTYSKVDPLDTLILCVRVAVLVAVTLTVPVVLFPIRRAILQLLFPAKPFHWARHITIALCLLFVVNVLVILVPNI…	475	10	0.0210526
adenosine kinase isoform 1	642112112	389	43 kDa	MASGEPRAKKLRLSDEKKEKKTPEKKTPEKKTPEKTQESSRKAPTKLGPNSLFGMGNPLLDISAVVDKDFLEKYGLKPNDQILAEDKHKALFEEIVKKFKVEYHAGGATQNSIKIAQWMIQDPHKVCTFFGCIGEDKFGEILKQKADEAHVDAYYYEQTEEPTGTCAACITGDNRSLVANLAAANCYKKDKHLDLKENWKLVEKAKVYYIAGFFLTVSLESILKVAKHASENNKLFTLNLSAPFISQFFKDALMEVMPYVDVLFGNETEAATFSKEQGFQTEDIEEIAKKAEALPKVNKKRPRIVVFTQGKDGTIMTKGGDKVETFPVLKIDQKDIVDTNGAGDAFVGGFLSELVQDKELEQCVKAGHYAANVIIRRAGCTFPEKPDFH	389	7	0.0179949
protein disulfide-isomerase precursor	642113054	512	57 kDa	MLKLFLLCTLAVLSRADIGEEDDVLVLKKSNFEEALKAHPNILVEFYAPWCGHCKALVPEYAKAASMLKAEGSEIRLAKVDATEEADLAQEYGVRGYPTIKFFKGGDKESPKEYSAGRQADDIVNWLKKRTGPAATTLGEVAEAESMIADNEVAVIGFFKDVESEGAKAFLNAAEAVDDVPFGITSNDAVYSKFEVSKDGVVLFKKFDEGRNTFDGELSKADLLAFIKANQLPLVIEFTEQTAPKIFGGEIKSHILMFVPKAASDFDEKMVEFKKASEGFKGKILFIFIDSEVDDNQRILEFFGLKKEECPAIRLITLEDEMTKYRPESEAITADNIVAFCTLFTEGKLKPHLMSQDIPEDWDKNPVRVLVGKNFEEVVFDPKKNVFVEFYAPWCGHCK…	512	7	0.0136719
THO complex subunit 2 isoform X1	642113411	1564	179 kDa	MATRIIPADWIKNWEKSGKHEFVQLCKNLAYKTNHDGTIKDIQAALYELCWHVIQGNFKLDLSASVLCDMMDLRDDMPSILADVFSILDIETSSLEEKNKRDHYTQLVGACLFFVPDAILKERLDPETLESLGLIKQAHQFNQKIVKIKTKLFYKQQKFNLLREENEGYAKLITELGQDLSGNITSHIVLESIKSLIGCFNLDPNRVLDIILEVYECRSDQDEFFLPLIKSYMCEPLTLCHILGFKFKFNQEPNEETPTSLYHIAAALLHHNLIELEDIYVHLMPLDASIVEEHKREITEAKQIARKLTMVVVPSEKTEDKEREKEEEKNDKAPDNQKLGLLEALLRIGDWHHAQSIMDQMPSFYATSHKAIALALCQLLHLTVEPLYRRAGVPKGAKG…	1564	34	0.0217391
nicastrin precursor	642113580	465	51 kDa	MVCDPLGDYNVWGSIRPYNDTVFGHKEDESVVIAAARLDSRAFFWEVSTGAEGSVSGFVTLLAAAQALREVTHEAPPTRNILFAFFQGETFDYIGSSRMVYDMENGKFVIDLDNIHSVLEIGQVAVHSGTNLFLHSDPVSRRNNTVNDEVKNLVNNLQSSTAGLSFLLVEPNVSQPLPPSSLQRFLRAQPIPGIVLADHESAFNNRYYESFYDNAANLNLTYPSDLSPEEQLEFVTDTAKSLTDVATVVARALYKQAGGNESLVNNIKADPKIVTQMLYGFLVSSNNSWFQAVMAPELKNILKPSPPEYYVGVAMSSTPTRLVQYLLANLTGAATNLTQSQCQKPDELPNESRQMYSYLWVQGIVPPNSTERDSFCVRASVRLTKAVSPAFELGEYASK…	465	3	0.00645161
proteolipid protein 2	642113890	153	16 kDa	MADTEASVAAGCLEKLKGYVKTRKGTILAAEILISFIILICYAASLYGGYSAVAICEMVFAIIFFVVFMMEMDKSIQVVNWVWSDLIRAAIGAALYLITSLICVIGGAGDGARIAGGVFGLLAGILFSYDAYTIFLVIKSTRQHTAAPTDDRV	153	4	0.0261438
microtubule-associated protein RP/EB family member 1 isoform X1	642113912	276	31 kDa	MAVNVYSTSVTGDNLSRHDMLSWINESVQMNYSKIEQLCSGAAYCQFMDMLFPGCIPLKKVKFQAKLETEFLHNFKLLQTSFKKIGVDKIIPVDKLIKGKFQDNFEFVQWFKKLFDANYDGKEYDPVSARQGQDTAPTPNPGQVAPKPRKPSTVQPHSSPPVIKPAARVAPMRSTTTVTKPPPKSAGSALRRPGAAGDVEREELSQEVSSLKATVQDMEKERDFYFGKLRSIEVICQEVDGEADTTMQKIMDVLYATDEGFVIPDSDAEGEEPEEF	276	4	0.0144928
pyruvate dehydrogenase E1 alpha 1	642114070	393	44 kDa	MQKMLTIISNVLRGSARRNGASLVVASRSYADFTPEATFDIKKVDLHRLEEGPPLTSTLTREEGLKYYRTMQTIRRMELKADQLYKQKIIRGFCHLYDGQEACAVGIEGGITLSDHLITAYRAHGYTLTRGGTVREIMAELTGRRGGIAKGKGGSMHMYTKNFYGGNGIVGAQVPLGAGVALACKYLGNDQLCVSLYGDGAANQGQIFETYNMSSLWKLPIIFICENNQYAMGTSVERSAASTEYYKRGDYIPGIRVDGMDVLCVREATKFAAAHCRSGKGPILMELQTYRYHGHSMSDPGVSYRTREEIQEVRSKSDPISMLKDRMLSNNMASIEELKEIDIAVRKEIEDAAQFATTDPEPPLDDLCSHIFANDQPFEVRGATPWTKLTSTS	393	8	0.0203562
dolichyl-diphosphooligosaccharide--protein glycosyltransferase subunit STT3A	642114183	804	92 kDa	MNNTNKKKYISRVFNTVIHYYCLWVTLKYALLLLAVKLTFFSHVCFRTFSLSTFSSFNKGFNSPSELSLELGSDCWLVLTSFHLLLFNYRSTHHLTTNGFYEFLNWFDERSWYPLGRIVGGTVYPGLMVTAGLIHYVLNLLHLTVHIRDVCVFLAPVFSGLTSISTFLLTRELWNQGAGLLAACFIAIVPGYISRSVAGSFDNEGIAIFALQFTYYLWVKSIKTGSVFWSIGCCLSYFYMVSAWGGYVFIINLIPLHVFVLLLMQRYSRRVYIAYSTFYIVGLVLSMQIPFVGFQPIRTSEHMAAAGVFALLQAYALLQYLKDRLTKQEFQTLFFLGVSLAAGVVFLTVIYLTYTGYIAPWSGRFYSLWDTGYAKIHIPIIASVSEHQPTTWVSFFFDL…	804	12	0.0149254
chromatin assembly factor 1 subunit B isoform X1	642114378	1639	182 kDa	MKVITCEIAWHNKEPVYSLDFQHNSEGRIHRLATAGVDTTVRLWRVEMGPDGKAVVDFLSNLARHTKAVNVVRFCPNSELLASGGDDAAILLWKLNDSKEPEQAQSFQEEEDSQLNKESWSVVKTLRGHIEDVYDISWTRDGNFMVSGSVDNTAIMWDVTKGQKLCIFNDHKSYVQGVTWDPLGQYVATLSCDRVMRVYSTQSRRKAYSVSKMSSGSAVEGEVKQYRMFHDDSMKSFFRRLTFTPDGSFLLAPAGCVEAGENVTNTTYVFSRKSLKRPIAHLPCPAKATLAVRCCPVYFELRTKKGDDGSAQPLPNMFGLPYRLVFAVASEDSIFIYDTQQTLPFGYVSNIHYHTLSDLTWSRDGSFLAVSSTDGYCSFLSFSPGELGTPLKEPPVLEV…	1639	34	0.0207444
protein phosphatase 1 regulatory subunit 12A isoform X4	642114618	954	105 kDa	MKMADAKQKRNEQLKRWLGSETDIEPPILKKKKAKVKFDDGAVFLAACSSGDTEEVLRMIDRGADINYANVDGLTALHQACIDDNVDMVTFLVEHGAAINQPDNEGWIPLHAAASCGYMDIAEYLIGQGASVGVVNSEGETPLDIAEEEAMEELLKNEINRQGVDIEAARKEEERIMLRDARQWLNSGTINDVRHAKSGGTALHVAAAKGYAEVLKLLIQAGYDVNIKDFDGWTPLHAASHWGKEEACKILVENLCDMDLINKVGQTSFDVADEDVLGYLEELQKKQNLLNSEKKDVKKSPLIETTTTGDNNQNLKSIKSKETLLLEPEKPALRIETLEPEKVDEEEEGKKDQESSCSSEEEEEEDSESETEADKSKTPVPVSNSNGTAVVPTPTSVTV…	954	10	0.0104822
uncharacterized protein LOC568911 isoform X1	642114822	387	44 kDa	MRRRTDGHDRTYQKVAKKRLTDRLQTSQQQHRPQQGAKTSRCWSTVTSVGKCLLLIILIPPFLNYASLQREGQLLLPEDGEIIDIGLGQKMHLMCKGQGQPVVILDAPTGMSSDIWFHVQENIALLTKVCTYDRVGLGFSKRVLQNESTGTEKVWGMSTTGRMVDNLHRLIGLAGLATPLILVGSELGTLNARFYSHIHDAQVSDLVLIDPIPEDIFEEDQWQKYWYSQRVPSLQAMQFSAATGISRILIILGLLKPAIMGDNIAEDLIQRQKYLLSNPAHQSSAVDEHFFLNESASQVREISKFKPLSSRTSVSVIIGDSFDEQIPAPLNQVVAQLQKTLLEQTYPSANQIHVKGGDRRMIYKRPSVVSKHLWKLVSQRQSKQQSQ	387	4	0.0103359
aspartate aminotransferase 2a	642115413	427	47 kDa	MALLKSSKIISTVGLHPPLGVLSIRASSWWSEVQMGPPDPILGVSEAYKRDTNPKKINLGVGAYRDDQGKPYVLSCVRKAEAQIAAKKLDKEYLAIGGLGDFTKACAKLALGDDNEVIKSGRNITVQTISGTGSLRIGANFLSRFHTEARDVYLPKPSWGNHTPIFRDAGMQLKAYTYYDPKTCGFDFQGALNDISKIPEKSVIMLHACAHNPTGVDPRPEQWKEIADLVKKRNLLVFFDMAYQGFASGDIDRDAWAVRYFIEQGHNIVLSQSFAKNMGLYGERVGGFTVVCKDAEEAKRVESQLKILIRPIYSNPPMNGARIAATILNTPDLYKEWLGEVHGMANRIITMRELLVANLKKEGSTRNWKHVIDQIGMFCFTGLKPEQVERLTKEFSVYM…	427	6	0.0140515
retinol dehydrogenase-like	642116221	360	40 kDa	MGNPAYDWSNGWTNTIPRSVTRCFFDLPVLPDCTLRKAINTFFGQYQTGIALITVTGVGLFALRKWLAGGVCTSKARLDGKTVLITGANTGIGKETAVDMASRGARVILACRDMTRANQAAEGIRRRSGNGNVIVKKLDLASLQSVRQLAKEILESEERLDILINNAGIMSCPKWQTEDGFEMQFGTNHLGHFLLTNCLLNLLKKSVPSRIVNVSSLAHEKGKIYFDDINLDKDYSPWKSYRQSKLANVLFTRELATRLQGTGVTTYSLHPGVIRTELGRHFWPTMPLWKRAIYKTLSFWLKSPREGAQTTIHCAVEESLADVSGLYYSDCAPKTVAPQGQDDAAAKKLWDLSASMVGLA	360	8	0.0222222
ADP-ribosylation factor 4	642116229	180	20 kDa	MGLLISSVFTRLFGKKQMRILMVGLDAAGKTTILYKLKLGEIVTTIPTIGFNVETVEYKNICFTVWDVGGQDKIRPLWRHYFQNTQGLIFVVDSNDRERVAESAEELSKMLQEDELREAVLLVFANKQDLPNAMAVSDLTDKLGLQSLRSRVWHVQATCATQGTGLYEGLDWLSNELSKQ	180	2	0.0111111
protein NipSnap homolog 2	642116498	286	34 kDa	MATRVLQRFGNGLSQAKNTAQSTGQTVVLSRGLSASNHRSREDSWFKSLFVRKVDPRKDAHSHLLTKNEESNLYKIQFHNVKPECLDAYNQLCEETLPSIHNDKYYPCELVGTWNTWYGEQDQAVHMWRYRGGYPALTEVMSKLRQNKEFMKYREERGKMLLSRRNQLLLEFSFWNEPIPRKGPNIYELRSYQLRPGTMIEWGNYWARAIGYRQHNSEAVGGFFSQIGNLYMVHHLWAYKDLEAREATRNAAWQHEGWDEVVYYTVPLIQHMDSRIMIPMKASPLQ	286	3	0.0104895
apoptosis-inducing factor 1, mitochondrial isoform X1	642117286	714	77 kDa	MWTCKNLWKKLAPLARSSSTLCRQNARGVLLNNERRLPLVPQAHMSSGTPGSRGDNNLYYLLVGATCVGGGFYAYRTIKGDKERYQERINEIASRPNKVVPEQPITEAPGEQAAETPQEIAPVTEDAPVETPEVTPIVEEVSPEVAAVEQEDPPTTPEAEIAPESVVEPAPEESVGTPDADPVVKSEPTPVAGSLPAETAEPQTTTETESAAEPATVAPAEVPAPTPVEFPSHAPYLLIGGGTASFAAARSIRARDPGARVLIITDEPDLPYMRPPLSKELWFSDDPSVVDTLRFKQWNGKERSIYFQPPSFYVSPQDLEKVENGGVAVLTGKKVVHMDVRGNKVTLSDGTEISYDKCLIATGGIPRNLQVIERAGEEVTKRTTLFRKVEDFKALDKVS…	714	6	0.00840336
ATPase family AAA domain-containing protein 3	642117480	674	75 kDa	MSWLFGLNKGQPEAPPEFPVPPPPPPPAGGSGGGGDKPKDKWSNFDPTGLERAAQAAKELDKSRHAKEALDLARMQEQSVQMEHQTKIKEYEAAVEQLKGDQLRIQGEERRKTVGEETKQHQSRAQFQDRLARQRYEDQLKQQQALNEDNLRKQEDSVLKQEAMRKATIEHEMQLRHKNELLRVEAESKARARVERENADIIREQIRLKAAEHRQTVLETIRTAGAVFGEGFRAFVSDWDKVTATVAGLTLLAVGVYSARNATAVAGRYIEARLGKPSLVRETSRITVAEAIKHPIKMSKRLTSKPQDALEGVVLSPNLEERVRDIAIATRNTRQNKGLYRNILMYGPPGTGKTLFAKKLAVHSGMDYAIMTGGDVAPMGREGVTAMHKVFDWANTSRR…	674	1	0.00148368
peptidyl-prolyl cis-trans isomerase FKBP11 precursor	642117710	193	21 kDa	MKAKTGVTLVLLAAFVYVAAQEGESEQNVVEELLVETLVKPETCSVTSEMGDTLQIHYTGKLLADGKVIDSSLSRDPLVVELGKRTVIPGLEQSLVGVCEGQKIKTTIPPHLAYGKRGYPPTIPADAALEFEVEVMSLIQATPWQKMVNDVFPLVCLGLVPTLLGMVGLYLYNKANAQRPGKKKAKDKKSKKK	193	3	0.015544
SWI/SNF complex subunit SMARCC2	642117726	1063	118 kDa	MAVRKKDGGPNVKYFEASDTVSQFDNVRVWLGKNYKKYIQAEPPTNKSLSSLVVQLLQFQEEVFGRHVSNPPLTRLPMKSFLDFKSGGALCHILAAAYKFKSDQGWRRFDFQNPSRMDRNVEMFMTIEKSLVQNNCLSRPVIYLSSDIEAKLLGKLKDIIKRHQGSVTEDKTSSSHVVVPIPASLEEEEWVRLVMKRDKQVLLHWGYYPDSYDTWISASEVEAAVEEAPSPEKPRKVHAKWILDLDQFNEWMNEEDYEVGEGGPKRKRISAKTLTDEVTTPGDERRDKKPGSAKKRKRSPSPSPTPPPQESKKKNTKKGCGPTTPYTKSKRGQREEEPEDLTKDLDEPSPVPAVEEVTLPKTANTKKDSESTPVKGGTMTDLDEQEDESMETAGKEEEE…	1063	6	0.0056444
transmembrane emp24 domain-containing protein 10 precursor	642117798	207	24 kDa	MSRFCILLILVSVIFDSTFSITFYLPVNLRKCLREEIHKDVLVTGEYEVSDQPNAKTNLKITDSSGHTLYSKEDASKGKFAFTTEDYDMFEVCFESKSPLGTGRVPDQLVNLDMKHGVEAKNYEEIAKVEKLKPLEVELRRLEDLSESIVNDFAYMKKREEEMRDTNESTNTRVLYFSIFSMCCLIGLATWQVFYLRRFFKAKKLIE	207	5	0.0241546
leucine-rich PPR motif-containing protein, mitochondrial	642118288	651	72 kDa	MLKEMKEKEVVVRDTTVTLLFHVLNAAAMKGDVVAVRRLQDTIFTLGLATPTANLCSPLVSAHLETKDLGGALEAAMECQKQYGQLPRIHDVICGLVERGDTELLQKAMDFVSQERGEMTMLYDLFFAFMQTGRHREARKIIETPGLRARPGRLQWYAEKCINGNQMESLESMVDMTAKLFECDRDELYHYVLRLCKDTNDWRKAEATWTKMQEENVIPRERTLRILADILKSNGQEVPFEVPEVWYEQAADREAQAETKPVGSKGKATKSASTQAATAENNPADYQLRLLTLCKKGKAKEAYDMLKDIDRKGVTLGPAPYDSLIRALLAEGSMENAMVVKEIAVGRVPGFKLNDIANSLLIITQVKRGLAKDGMSTLKSMLQGDQVPSKLSVTRLVQS…	651	10	0.015361
calpain small subunit 1	642118485	216	25 kDa	MFLAKRLIGGILDVVSNIDPGQFVPSDPPPPRRPLAYAEQNENDEERQFRKVFQQLAGDDMEVSPTELMNILNRIIGKRSDLKTDGFSIESCRSMVAVMDSDSTGKLGFHEFKFLWNNIKKWQCIYISNDADRSGLISSQELPATFKAAGFPLNDQLFQLMVRRYSDEQGNMDFDNFIGCLVRLDAMCRAFKTLDKDDNGTIKVNIQEWLQLTMYS	216	4	0.0185185
mitochondrial import inner membrane translocase subunit TIM50 precursor	642118490	399	45 kDa	MFTGSVPFKMSATSMFPMCVRASRGLLRLRNGGRGGSNSTGVALIRALSTEKPQTGDGSATGGLAQAILQERLQQQQKSQGQPPPEGDGDSEQKQDQGEDKKQKENTAYAKKMVMRLAGLMGIGGAVGMVYVFGSNSVDEQGNAIPDQFDNDTPVIQQLRRTFKYFQDYRQMIIEPTSPKLLPDPLREPYYQPPYTLVLELTDVLLHPEWSLATGWRFKKRPGIDYLFQQLAPLYEIVIFTAETGMTAYPLIDSIDPQGFVMYRLFRDATRYMEGHHVKDVSCLNRDTSKVIVVDCKREAFSLQPFNGMALTKWDGNSEDRTLYDLAHFLKTIALSGVDDVRSVLENYALEDDPVEAFKRRQAQLAQEEEQRLAELAQPKKQGISLGSIAGRFWRSKQQ	399	3	0.0075188
KH domain containing, RNA binding, signal transduction associated 1a	642118843	381	42 kDa	MENESKYLPELLAEKDSLDSSFTHAMKLISTEIERIQKGETKKETERETYLDLFTTKNIKVKERVLIPVKQYPRFNFVGKILGPQGNTIKRLQEETGAKISVLGKGSMRDKVKEEELRKGGEPKYAHLGMELHVFIEVFAPIPEAYLRMAHAMDEVKKFLIPQDTMDGICQDQFMEIGYLNGGQDSQSRGRGGPPGRGRGAPPPNSVGARGRGMLPRGGAPRGGTQRGGASRGGPPRGGSARGAPAGRGGPPSTPARGGTTPRSRPPTPGTPRMLPSPAHSHQQHQHQHAPPPKAEAYNEYPAYEESYAEPAYEGYDNYYSQQPPQADTEYYDYGHGEAQEAYEPYAQDDWEGSWSSTGGKAPPARQDKRGAYREHPYGRY	381	1	0.00262467
translational activator GCN1	642119311	2346	257 kDa	MAQHPSVKYVFALTELWSEGKLTAFGQKMSVLSGIGSCSHHAVSGTSSQTLSSAVAVLFIPYLQQEVHEGTLVHAVAMLSQWSGRLTVEVPKALLDWFKKAFTLKTSTSPVRHAYLQAMLAAFKGDTLGQVSDLVPLLLQTVEKAAAQNSQHALLSEGVAAAVLLSRLSLLETQTEAKLAVFWTLILDEKKPLFTTEKFLSQASEEALCTVIQLCERIFLDHSHRLTNGKSPMYHRATVAVLLSRSWRVRKRAQQTVKKLLSSLGGSGLAHGLLGELKVVINKHKVLPQEVLQTESGELSEVGKAYSPPRVLLEALCVVCSVAGQWNDTAEADKIAMEILVVTHHPSIVEARPGFWPHLLSSMNIKADEFIDKNLDDILPRLLQANADNQAIRNAVGAL…	2346	39	0.016624
centrosome-associated protein 350 isoform X6	642119460	2965	329 kDa	MLLLNNTDPKANKRELSAAWKSLNQTKAALQHIENHLEASPGSGVLLDSVMDTKKSSGGATRKVSHRDGRRTEDCSQAGGTSKSRRRSHRSPDKSSRSPLRNTTQDSNVHRNNCVEFKEPLTSYREATPTPPLTSSQLEAQSLQSEYATPPPPDSCLSQLVYQSDTRDQQTHGDLDSTHSSALDSTVVRYLNHCPTLEALRTPGHTAAARDANKEGGPEHRPKAHTLEGPAPPPAETVSSSPGSASQRLENLRRRKPDDKLEKLKETIRRQREHLEAADRDRLLEQPVGISGAVETTTVPTAKIRKVAAAPPAPIYKGFNRSETKICTPDGKVWREIYRDLSRQLSESTKPKQRPTEKAKERKPSKSVRKIHKSASVPHPETKLVISTTSWREGQKLVK…	2965	24	0.00809444
LOW QUALITY PROTEIN: Golgi apparatus protein 1	642119563	1123	129 kDa	MHPIRGQKSANSVKANTAVRVNIQAQNQAAVPAAVNGGSPVVAASPPRRRTSGWKLAEEGACREDLTRLCPKHSWNNNLAVLECLQDRKEETEIAADCNHLLWNYKLNLTTDPKFESVAVEVCKTTISDIKECAAEERGKGYLVSCLVDHRGNITEYQCNQYITKMTSIVFSDYRLICGFMDNCREDINSLHCGSISTGEKDVHSQGEVIACLEKGLVREAEEQPGAHAIRPDCKKAIMRVAELSSDDFHLDRYLYFSCREDRERFCENTPAGEGRVYKCLFNHKFEEAMSEKCREALTTRQKLITQDYKVSYSLAKACKTDLRKYRCSVDTNMPRAREARLSYLLLCLESAVHRGRTVSGECQGEMLDYRRMLMEDFSLSPEIVLHCRGEIEAHCSGL…	1123	67	0.0596616
septin-7 isoform X1	642120563	433	51 kDa	MLCWYVTFQQQKNLEGYVGFASLPNQVYRKSVKRGFEFTLMVVGESGLGKSTLINSLFLTDLYSSEYPGPSHRVKKTVQVEQSKVLVKEGGVQLLLTIVDTPGFGDAVDNSNCWQPVIDHIDSKFEDFLNCESRVNRRLMPDSRVQCCLYFIAPSGHGLKPLDIEFMKRLHEKVNVIPLIAKADTLTPEECQRFKKQIMREILEHKIQIYEFPETDDEEENKLVKKIKDRLPLAVVGSNTIIEVNGKRTRGRQYPWGVAEVENGDHCDFTILRDMLIRTHMQDLKDVTNNVHYENYRSRKLAAVTYNGQDNNRVKGQQSTKHDTGEGMSPLAQMEEERREHVAKMKKMEMEMEQVFEMKVKEKIQKLKDSEAELSRRHEQMKKNLEAQHKELEEKRRQF…	433	7	0.0161663
L-lactate dehydrogenase B-A chain	642121019	334	36 kDa	MSSVMQKLLTPVASGPAEPPRNKVTVVGVGMVGMACAVSVLLRDLADELALVDVMEDKLKGEMMDLQHGSLFLKTSKIVADKDYAVTANSRIVVVSAGVRQQEGESRLNLVQRNVNIFKHIIPQIVKHSPNCTLIVVSNPVDVLTYVTWKLSGLPKHRVIGSGTNLDSARFRFLMAERLGIHASSFNGWVLGEHGDTSVPVWSGVNVAGVNLQKLNPEFGLDGDKEDWKATHKAVVDSAYEVIKLKGYTNWAIGLSVADLTESIIKNMSRIHPVSTMVKDMYGIGEEVFLSLPCVLNSNGVGSVINMTLTDAEVGQLKKSADTLWGIQKDLKDI	334	3	0.00898204
splicing factor, arginine/serine-rich 3	642121925	198	23 kDa	MLIKSPSFLPDLYILSTLQRKQVSFEMGEPAHLRDCPLDCKVYVGNLGNSGNKTELERAFGYYGPLRSVWVARNPPGFAFVEFEDPRDATDAVRELDGRTLSGCRVRVELSNGEKRSRSRGPPPSWSRRPGRDDYSSRRRGSPPVRRRSPRRRSFSRSRSRSPSRDRRRDRSISRDRNHKPSRSFSRSRSRSRTTERK	198	3	0.0151515
guanine nucleotide-binding protein G(i) subunit alpha-1	642122004	354	40 kDa	MGCTLSAEDKAAMERSKIIDRNLRESGEKASSEVKLLLLGAGESGKSTVVKQMKIIHEDGYTQEECSQYRVVVYSNTIQSIIAIIRAMGRLAIDFGDTARSDDARQLFTLASSAEEGVMTPELAGVIKRLWQDGGVQICFGRSREYQLNDSASYYLNDLDRISQQNYVPTQQDVLRTRVKTTGIVETHFTFKDLYFKMFDVGGQRSERKKWIHCFEGVTAIIFCVALSDYDLVLAEDEEMNRMHESMKLFDSICNNKWFTGTSVILFLNKKDLFEDKIQKSPLTICYPEYSGPNTYKEASTYIQCQFEDLNKRKDTKEIYTHFTCATDTKNVQFVFDAVTDVIIKASLKEVGLY	354	9	0.0254237
cofilin 2, like	642122298	150	17 kDa	MKVRKAQANEDEKKKRKKAVLFCLSEDKKHIVLESGKEILTGDVGTTIADPYLHFVKMLPADDCRYALYDATYETKETKKEDLVFIFWAPDGAPLKSKMIYASSKDAIKKKFTGIKHEWQVNGLEDIKDRRTLAEKLGGSSVVTLEGGPV	150	2	0.0133333
electron transfer flavoprotein subunit alpha, mitochondrial	642122819	333	35 kDa	MLRAVNKTHFKQLSGLLQRFQSTLVVAEHNNDKLTPITLNAITAAKKLGGDVSCLVAGTDCTKVAQEISKVLGVKTVLIAQNDAYKGSLPEALTPLILATQKQFNFTHICAGASAFGKNLLPRLAAKLDVAPISDIIEIKSPDTFVRTIYAGNALSTVKSNDNVKVFTVRGTSFEPAEVEGGSATSEEVAASTPDGMSEWLEASLTKSDRPELTSAKVVVSGGRGLKSGDNFKLLYDLADQMNAAVGASRAAVDAGYVPNDMQVGQTGKIVAPELYIAVGISGAIQHLAGMKDSKTIVAINKDPEAPIFQVADYGLVADLFKAVPEMTAALSK	333	3	0.00900901
transgelin	642123180	206	23 kDa	MANKGPQVGMANKGPSYGMSRVVQDKIDKKYDAEVEELLVQWIVAQCGSGVGKPEAGKLGFQDWLKDGCVLSELINSLHKDNKPIKKIASSSMAFKQMEQISQFLTAAESFGVIKTDMFQTVDLWEGKDLAAVQRTLMSLGSVAVTKDDGNYHGDPNWFFKKAQENRREFTDDQLKAGKGVIGLQMGSNKGASQTGMSYGATRQIQ	206	2	0.00970874
delta-1-pyrroline-5-carboxylate dehydrogenase, mitochondrial precursor	642123225	556	61 kDa	MLRVRSALCHSWRGFRTFPCAAVEVKNEPILGFNEGSPERAELQKALDDLKGKTEEIPCVVGDEHVWTKDIRYQLSPFNHSHKLAKFCYADKDLLNKAILASVAARREWDLKPIQDRAQVLFKAADIISGPKRAEILAKTMIGQGKTVVQAEIDAAAELIDFFRFNAKHAVELESQQPLDSDGSTNTMLYRGLEGFVAAVAPFNFTAIGGNLAGTPALMGNVVLWKPSDTAMSASYAVYNVLRESGLPPNIIQFVPADGPVFGDTITSSEHLAGINFTGSVPTFKRLWKQVAQNLDIYKNFPRVGGECGGKNFHFVHKSADVRSVVTGTIRSAFEYGGQKCSACSRMYVPDSLWPQIKQGLLDIHKQLKVGDPVEDWSTFFSAVIDDKSFARIKKWLDH…	556	8	0.0143885
protein disulfide-isomerase A6 precursor	642123350	443	48 kDa	MRGLLLGVLGCSLVLMAQGFYSAADDVVELNPSNFNREVLQSDSLWLIEFYAPWCGHCQSLTADWKKTATALKGIVKVGAVDADQHKSLGGQYGVRGFPSIKIFGANKNKPDDYQGGRSSQAIVDGALNTLRTLVKDRMSGRSGGSDNNRQSGGGGGGGSKKNVVELTDDNFDRLVLDSGEVWLVEFFAPWCGHCKSLEPEWAAAASAVKEQTKDKVHLGAVDATVHQGLASRYGIRGFPTIKIFKKGEEPEDYQGGRTRGDIIARALDLFSDNAAPPELLEILNADVLKKTCEDYQLCVIAVLPHILDTGAAGRNSYLEVMMKMAEKYKKKMWGWLWTEAGAQMELEASLGIGGFGYPAMTAINARKMKFALLKGSFSETGIHEFLRDLSVGRGSTAT…	443	7	0.0158014
periaxin isoform X28	642123462	2959	318 kDa	MGASLCPRPISALVASHLEISPLRDRLTGNRLVSEKQCVISAHQPGESLPSTQGGSTLRQWYQPDSDRELEESHVFTQAREPAVKDKRWSPPSDRPPTAPHANPHHSASPEDQESPERVVQKEKLHAELKQVLSLKRSHMKETSHLAQAEMDSSADTQAVEETASEVVEVVLETEAEAGASGYSVTGGGERGLFIKDVLKDSTAAKHLSLQQGDQLLSARVYFDNVKYEDALKILQCAEPYKVSFFLKRTITGADVTLHPGTSSLELKGPKTKMQKMSVKSIKPFKAKKKKGGRFGLKRLKENKKGSTGAELEMEGSPSKVELNPIDVEFAFPKFKLGKDGKAEGTEQHGGVVATGRKQRTIRCPRMKANGAEAATGEVDMTRPEGQADVSLPDVPGAK…	2959	16	0.00540723
lamin-B1 isoform X1	642124060	504	57 kDa	MTMGTSVIEIPSWRFKTHTLPPWLGRTQCCYASTSACSFAKKESDAAGALARLRDMETQLNSKEAVLATTLSEKRALEASLADLQGTVQELDSGLIFAKKQLGEETLLRIDLENRYQSLSEELEFRKNMFEEEIKETRSRHETRLVEVDSGRAVEYEFKLAQALTEMRGQHDEQVKLYKDEMENTYVAKLENVRLSSEMNSSSASMAREELRESCLRVESLAAQLASMQKETRGWQDRIHELESALAQERDTSRRMLGEKEREIAEIRAKMQMQLDEYEQLLDVKLALDMEINAYRKLLEGEEERLKLSPSPSSRVTVSRAQSSSRSVRTARGKRKRVDVEEQEASSSVSIAHSASTTGPVCIDELDTDGKFIRLHNTANENQAMVGYELNRTIGEVSA…	504	6	0.0119048
serine/threonine-protein phosphatase 2A 65 kDa regulatory subunit A beta isoform isoform X1	642124494	589	65 kDa	MAGADGDDSLYPIAVLIDELRNEDVQLRLNSIKKLSTIALALGVERTRTELLPFLTDTIYDEDEVLLALAEQLGNFTMLVGGPEYVHCLLPPLESLATVEETVVRDKAVESLRKISQEHSPVDLEVHFEPLVKRLASGDWFTSRTSACGLFSVCYPRVSSTVKAEIRQHFRTLCSDDTPMVRRAAASKLGEFAKVLELDYVKSDIISLFTALASDEQDSVRLLAVEACVSIATLLPQEDLETLVMPTLRQAAEDKSWRVRYMVADKFSELQKAVGPEITKNDLVPAFQNLLKDCEAEVRAAAANKVKEFCENLPEDSRETIIMTHILPCVKELVSDTNQHVKSALASVIMGLSTILGKDNTVEHLLPLFLAQLKDECPEVRLNIISNLDCVNEVIGIRQ…	589	14	0.0237691
cytochrome c-1	642124582	307	34 kDa	MAALRVVVLSGTGRAFLCTPKMIKAPRANMSFASLPRSKKVALTTLGVLTTGGAGLALMLQQSVKASDLELHPPNYPWTHSGMLSALDHASIRRGYQVYKQVCSACHSMEYLAFRNLVGVSHTEAEVKVLAEEIEVVDGPDESGEMFTRPGKLSDYFPKPYPNPEAARVANGGALPPDLSYIVNARHGGEDYVFSLLTGYCEPPAGVEVREGLYYNPYFPGQAIGMAPPIYNEVLEFEDGTPATMSQVAKDVCTFLRWAAEPEHDQRKRMGLKLLMGSAILIPLVYYMKRHRWSVLKSRKIAYRPPK	307	5	0.0162866
titin isoform X21	642124742	18634	2066 kDa	MWEAPEHDGGSPLTGYQIEKRDVSRKTWVKVITGVQDQEFTVTDVVEGKEYLFRVTACNKCGPGEPAYIDEPVNVSSPATVPDPPENLKWRDKSASGIFLTWEPPKWDGGTGIKGYNIERCQRGTDKWESCGDQVPELKLQVTGLIEGQWYAYRVKALNRLGASKPCKATDEILAVDPKDPPEILLDVKCLAGLTAKAGSKIELPADVLGKPVPKVKWTKGDMVLKGDDRVSIDDKPGHSVVTISKTTREDTATYIIEAHNSCGRATATVDVNILDKPGPPAAFDISEITNKSCFLAWNPPRDDGGAKVTNYIVESRAAESEIWHKLSSTVKETNFKALNLTAFKEYIFRVFAENQFGIGVPAEHMPIIARYAFDSPGAPTKLEPSDIVKDGLTLNWYE…	18634	279	0.0149726
protein VAC14 homolog isoform X1	642125286	783	89 kDa	MNTEKDFSPLTPNIVRALNDKLYEKRKVAALEIEKLVREFVAQNNSTQIRHVIQILASEFALSQHPHSRKGGLIGLAACSIALGKDSGLYLKELIEPVLTCFNDSDSRLRYYACEALYNIVKVARGAVLPHFNVLFDGLSKLAADPDPNVKSGSELLDRLLKDIVTESNKFDLVAFVPLLRERIYSNNQYARQFIISWILVLESVPDINLLDYLPEILDGLFQILGDSSKEIRRTCEVVLGEFLKEIKKTPSSVKFAEMANILVIHCQVSDESKLTNDLIQLTAMTWMREFIQLAGRVVLPYSSGILTAVLPCLSYDDRKKSTKEAASACNHSLMKLVTPEDDEDEEETGSGDSQPREDSPPKTEGDTNDMLNASQESVGFSNICFFTPTSADRSQVTL…	783	17	0.0217114
bcl-2-like protein 13	642125309	506	54 kDa	MAALCSSVPEGFHYETKYIVLNYLGLLPPSQLLSTAGGGDDQYAVDRAMERERNRVMKGQIEEELRQLEDEISAYFSSTGFDCHMSPVFSPSNPESSIEDCLAALGDRVARDLDTHLTSTVHTLLSAPLDYERFRKAAQDVSCHTQSGWAKVLVPLVLLQALQGEGQILATLLPLGVNFLEEAEADYIIRQGGWGTVFSLEEEEQQGLIIAEDSNDIYILSGEQLPTSLLGTGDNSELGSWQTESLRVSLAGHESWAQVGMMDHPEDLKSLESNEGNLSEERSENNSSNSDIVHVEREDAEEGEGGAEAPELQEIMLSVLGTESELAKLRAEFRDDTPPPVPAAPEPVVGCLEEPVVFKTPAPLSAVPSEPEPRAPSTVPMSEPESPALAPVVEAAPAK…	506	5	0.00988142
actin, aortic smooth muscle	642125350	377	42 kDa	MCDDEESTALVCDNGSGLCKAGFAGDDAPRAVFPSIVGRPRHQGVMVGMGQKDSYVGDEAQSKRGILTLKYPIEHGIITNWDDMEKIWHHSFYNELRVAPEEHPTLLTEAPLNPKANREKMTQIMFETFNVPAMYVAIQAVLSLYASGRTTGIVLDSGDGVTHNVPIYEGYALPHAIMRLDLAGRDLTDYLMKILTERGYSFVTTAEREIVRDIKEKLCYVALDFENEMATAASSSSLEKSYELPDGQVITIGNERFRCPETLFQPSFIGMESAGIHETTYNSIMKCDIDIRKDLYANNVLSGGTTMYPGIADRMQKEITALAPSTMKIKIIAPPERKYSVWIGGSILASLSTFQQMWISKQEYDEAGPSIVHRKCF	377	7	0.0185676
host cell factor C1b	642125404	1672	173 kDa	MTGSALQPRWKRVLGWSGPVPRPRHGHRAVAIKELMVVFGGGNEGIVDELHVYNTATNQWFIPAVRGDIPPGCAAYGFVCDGTRLLVFGGMVEYGKYSNDLYELQASRWEWKKLKAKTPKNGPPPCPRLGHSFSLVGNKCYLFGGLANDSEDPKNNIPRYLNDLYTLELRAGSSVVGWDIPITYGVLPPPRESHTAVVYTEKDSKKSRLIIYGGMSGCRLGDLWTLDIDTLTWTKPSVNGTAPLPRSLHSATTITNKMFVFGGWVPLVMDDVKVATHEKEWKCTNTLACLNLDSMAWESVVMDTLEDNIPRARAGHCSVAINSRLYVWSGRDGYRKAWNNQVCCKDLWYLETERPHAPSRVQLVRANTNSLEVSWGAVSTADTYLLQLQKYDIPAATAV…	1672	27	0.0161483
ras GTPase-activating-like protein IQGAP1, partial	642125536	1325	150 kDa	MPSGPLPWCQTHARTQLQQHVYLFLFPPHSLYLFKLGLAPQIQDLYGKVDFTEEEINNMKSELEKYGIQMPAFSKIGGILANELSVDEAALHAAVIAINEAIDQGVPEGTMAAMQNPNAMLLQMNTCSAQHYQDMLHSAKAEKVANSRKRLGENSDAERDVYEELLTQAEIQGNVNKVNLTSSLSAAEQALLSGDEDRLYEALRSQALGLHRLQAQNKGWYLKQLMAAREDKEQNSPGEVLTKDELQTGVDAANGIAAGYQKILSLXXFHFSSGKLSTFGTIPFFQHVRRASLAHLGLFHWFQLSQAIQAINRAVDSGEAPKTLAALRSPGAGLYGVTPECVQNYQDDLAKIKQDKTQDGDNGSDWMKHWVKGGHNYYYNLKTGEGSWTEPADFLQNNT…	1325	17	0.0128302
ATP-citrate synthase	642125768	1110	121 kDa	MSAKAISEQTGKEFLYKYICTSAAVQNRFRYANVTTETDFDRLAQDHPWLLTERLVVKPDQLIKRRGKLGLVGVNLDLKGVQEWLKTRLMKETMVGKAKGILKNFLIEPFVAHKQEEEFYVCIYATREGDYVLFHHEGGVDVGDVDSKASKLLVGVDEKLTEDAVKKQLLTHVAADIKEVLASFIVGLFNLYQDLYFTYLEINPLVVTKDGVFVLDMAAKIDATADYLCKAKWGDVEFPPPFGREAYPEEAYIADLDAKSGASLKLTLLNPRGRIWTMVAGGGASVVYSDTICDLGGVDELANYGEYSGAPSEQQTYDYAKTILSLMTREKHPEGKVLIIGGSIANFTNVAATFKGIVRAIRDYQGPIKEHEITIFVRRGGPNYQEGLRVMGEVGKTTG…	1110	16	0.0144144
condensin complex subunit 2	642125780	704	77 kDa	MSASSTPISRVRQWASPSLKHKGASPAAISTPLLASFPGNDDELERRQRRRSRVIDLQAASDSSFNESTSHSTTGTPAAVPKLSNAQISEHYSTCIKLSTENKITTKNAFGLHLIDYMADILKQKDSELTNFKVAAGTLDASTKIYAVRVDAVHADAYRVLGGLGAETKPGEEHGAGAGGEMEEGAEGELAAKQVVKKKRPPKKTVEQNLSNINSSESERKCEVDPMFQRMASSFDESSTAGVFLSVLFSEDSRCELLFPSHMTLLHSRPAYSQPPPQHVPATPFTGGLQRIQEKSSICPSLADFSFTSWNPDQTINQMLEKIKQGDHVFDVNAEADEEECQDFGDDFDGDYEEGQGDHGGDGSKEHGGDGSKEHKDRCEAGGPGRRRDVIPIGEGDIA…	704	9	0.0127841
myoferlin	642125944	1228	141 kDa	MDKNKGVKIPVQLRVNMWLGLSAHEKKFNSFSEGTFSVFAEMYENQALVFGKWGTTGLVCRHKFSDVTGKVKLKQERFMPPRAWEWEGEWFVDPERGLLTEVDAGHTEFTDEVYQNETRFIGGEWKAAADPFTDVNGQKSQSPGEIECPAGWKWEDDWSFDSNRAVDEKGWEYGVTIPPDDKPKSWGAAEKMYHIHRRKRLLRPRRKITDTKAAPERRDPGEGWEYSSLIGWKFHRNERSSDTFRRRRWRRKMAPSDGIGASAIFRLEGALGVDVDEKASKKDAARLFGANTPTVSCNFDRSYMYHLRVYVYQARNLIAMDRDSFSDPYAHVSFLHVSKTTEVIRATLNPTWDQTLIFNDIEIYGDPQTIAHNPPNVVLELYDSDQVGKDEAMGRCTCP…	1228	21	0.017101
calcium homeostasis modulator 2	642125992	319	36 kDa	MAALITENFKFVSLFFKSKDVMIFNGLIALGTVASQTMYNIFAFDCPCSSGRNYLYGLAAIGVPALAFYLVGIMLNKSTWDLVSECRLRRCRKLSGAAAFAVLGTIIGRAAVAPVTWAVISLLRGEAYVCALSEFVDPSTLEGFPSGQGLEVMARFPCKSTVPQEMQGFWAEIERRLKYESQLLGWLMVAGMAVVLFLLLCMKRCCSPLGYQQEAYWSQFRSNEHDLFQRTADVHSRILAVESVKSYFGFVALEKEEKQQLEEHQNASPISSTEWNRITGICLYREKRGLPLYSRLNKWAQYSVENNIDAMEKEMDTLS	319	10	0.031348
monoacylglycerol lipase ABHD12	642126021	369	42 kDa	MRKRNNSLTVDHDSSSTNTLLDSSPDINYCHKRGEGVPEPCVPSSSESDKKMGRPFRRYGLMGRLKRILLWVLGVYITIPFLVKLCPSIQAKLVFLNFVRLPYFIDLKRPQDHGLNHTYNFYLQPETGVNIGVWHTVPDQMWKEAQGKDREWYDSTFKSPYPVMLYLHGNAGTRGGDHRVQLYKVLSLLGYHVVTFDYRGWGDSDGSPSESGMTSDALFLYQWMKERVGSKPLNVWGHSLGTGVATNLVRRLCDRGTPPNSLVYRYLPGFEWFFLDTISANDIRFASDENVDHISCPLLILHAEDDSVVPFHLGKKLYNIASQSKSLSGHKLQFIPFPVSLAYKHKFIYRSPELPHILSDFLGTTHPHA	369	5	0.0135501
annexin A4	642126262	387	43 kDa	MVYVSSAHLYLLLRGQRYCMDNGNIMRISGKMLHVRLLTILGNNITFFLSIDFPISLAHVWKLNLTGIMAAIGNRGTVTEAAGFKVEEDVNRLRGAMKGAGTDEAAVIEVLARRSIAQRQRIKEAYKQTVGKDLTDDLQGELTGNFENVVLGLLMTAPVYDAYELRNAMKGAGTEEAALIDILASRTNAEIRAIAAVYIKDYEKNLEEDIDGDTSGMFQRVLVSLLTAGRDESNTVDEAQAVKDAKDIYEAGEARWGTDEVKFLTVLCVRNRNHLLQVFKEYQKISGRDIEDSIKREMSGSLENVFLAIVKCLKNKPAFFAERLYKSMKGLGTTDSVLIRIMVARAEIDMLDIKTEFLKAYGKTLHSFIKGDTSGDYRKILLELCGE	387	4	0.0103359
prenylcysteine oxidase 1 precursor	642126278	469	52 kDa	MMISRTMSIRALLFLGLFQAGQRSLASAPEVKDPPKRIAVVGAGIGGTATAYFLRQEFGAAVKIDVFEPGTVGGRLATHNMGDYEYETGGAVIHPLNLHMKHFLERLGLSQRRDVPGKMAIFNGKELIFEESDWFIVNFLRLLWRYGFNFLRMQMWVESVLDKFMRIYQYQQFGYSFTSVEKLLHAMGGDDFLTLANQTLEEAMLGEGFSQSFLNDVVAPVTRVNYGQSVRINGFVGAVSLAGADPGLWAVDGGNKKVCSGLLYHSKAELIPARVTSIAVKLRPSKAGITASLYEVNYVGDSGSAHSLYDIVIVATPLHQGKSDITFAGFSPPIPSQYPGRYHQTVTTLVHGLLNVYSRPPASESKVWKVFSPQPLSQEQLRDMFLSWDSTSETKWLAY…	469	1	0.0021322
developmentally-regulated GTP-binding protein 1	642126281	366	40 kDa	MSLLAKIAEIEAEMARTQKNKATSNHLGLLKARLAKMRRELITPKGGSGGGTGEGFDVAKTGDARIGFVGFPSVGKSTLLSNLAGVYSEVAAYEFTTLTTVPGVIRYKGAKIQLLDLPGIIEGAKDGKGRGRQVIAVARTCNLILIVLDVLKPLGHKKLIEHELEGFGIRLNKKPPNIGFKKKDKGGINFTVTCPQSELDGDAVKSILAEYKIHNADITLRSDSTADDLIDVVEGNRVYIPCIYVLNKIDQISIEELDIIYKVPHCVPISAHSRWNFDDLLEKMWDYLHLVRIYTKPKGQLPDYTSPVVLPTEHTAVEDFCLKIHKSLLKELKYALVWGASVKHNPQKVGKDHVMEDEDVIQLVKK	366	5	0.0136612
aldehyde dehydrogenase 18A1	642126364	780	85 kDa	MMLQRLALCSSLRSRSLQANVCPHFARAVSQTKFPVTHSPGKSAAHRSELRQAKRIVVKLGSAVVTRGDECGLALGRLASIVEQVAVLQNQGREMMIVTSGAVAFGRQRLRHEILLSQSVRQALHSGQNQLKEMSLPVLEARACAAAGQSGLMALYEAMFTQYSTCTAQILVTNLDFHDEQKRRNLNSTLHELLRMNIVPIINTNDAVVPPPVPNSDLQGVNVIHIKDNDSLAARLAVEMKADLLIALSDVEGLYDSPPGTDDAKLIDIFYPGDQQSIRYGSKSKVGIGGMEAKVKSALWALQGGTSVVIANGTDPKVTGHVITDIVEGKKVGTFFSEVKPAGPTVEQQTEMARQAGRTLATLHPDERGEIICRLADLLTEKKDEILSANKRDMETAAS…	780	15	0.0192308
sterol carrier protein 2b	642126393	149	16 kDa	MVVSNFKMRESQVVSSQRIQAVNTNAESSLERFKAYAVFQEIKKKLEEDGESFVKKIGGVFAFKVKDGPDGEEATWIVDVKNGKGCVHNDTAKKADCTIAMLDADLLSLMTGKMNPQTAFFQGKLKITGNMGMAMKLQSLQLQPGKAKL	149	2	0.0134228
protein disulfide-isomerase A3 precursor	642127181	491	55 kDa	MLKLFFFIVLAGAARASDVIEFSDDDFDSKIGDHGMILVEFFAPWCGHCKRLAPEFEVAATRLKGIVALAKVDCTVQNNVCQKYGVSGYPTLKIFKDGEDAGAYDGPRTADGIVSHLKKQAGPSSVELKTEADFTKYVGDRDASVVGFFADGGSPAQAEFLKSASALRESFRFAHTNSGELLQKHGVEGEGIILFRPARLSNKFEESSIKFSEDKFTNAMIKKFVQDNIFGMCPHMTDDNKDQMKDKDLLVAYYDVDYEKNPKGSNYWRNRVMKVAKSFLDQGKTLNFAVASKNSFSHDISEMGLDASSGELPVVGIRTAKGDKYVMAEEFSRDGKALERFLQDYFDGKLKRYLKSEPSPENNDGPVKTVVAENFDAIVNNEEKDVLIEFYAPWCGHCK…	491	7	0.0142566
ATP synthase, H+ transporting, mitochondrial F0 complex, subunit E	642127258	71	8 kDa	MVPPVAVSPVIKTARWSFLLIGMFYGKQRYDYLKPRAEKERLVEEAEKKIREEQEKIAKALAEASEDTILK	71	0	0
plexin-B2 isoform X1	642127326	376	43 kDa	MTGTLQVLVHGEGPDVTPVKVLNCDTVSQVKEKIIEAVYRNLPYSQRPKVDSVTLEWRPGSTGQILSDLDLTSQKEGRWRRINTLAHYNVRDNATLVLSRVIHTQQNYDQNQDNQEERNSLLDDDKVFHLVRPDELDEMKSKRGSMKDKSMTKAITEIYLTRLLSVKGTLQQFVDDFFRSVLCSGAVVPPAIKYFFDFLDEQALKHDNVDEETIHIWKTNSLPLRFWVNILKNPHFIFDVHVTEVVDASLSVIAQTFMDACTKSEHKLSRDSPSNKLLYAKEISTYKKMVDDYYKGIRQMVSVSDQDMNTHLAEVSRTHTDKLNIQVALYQLYQYASKYYDGIIQSLDEDPAAQSKQLTLRLQQIAAALENKVTDL	376	3	0.00797872
citrate synthase, mitochondrial precursor	642127620	472	52 kDa	MSFLTTGISRLAPRLLNSKNVTCILVASRHASSSTNLKDVLTDLIPKEQSRIKSFKQQYGKTNIGSITVDMVYGGMRGMKGLVYETSVLDPDEGIRFRGYSIPECQQLLPKAPGGQEPLPEGLFWLLVTGQVPTEEQVSWLSKEWAKRAALPSHVVTMLDNFPTNLHPMSQFSAAITALNSESSFARAYSEGVNKAKYWEFIYEDSMDLIAKLPCVAAKIYRNLYREGSSIGAIDSNLDWSANFANMLGYSDSAEFTELMRLYLTIHSDHEGGNVSAHTSHLVGSALSDPYLSFSAALNGLAGPLHGLANQEVLVWLTALQKEMGGEVSDEKMRDYIWNTLKSGRVVPGYGHAVLRKTDPRYQCQQEFAFKHLPNDPMFKLVHQLYKIVPPVLLEQGKA…	472	4	0.00847458
large neutral amino acids transporter small subunit 1	642128336	631	69 kDa	MSEIAFLGGNICPSELQTNDIPCRAHPCKALKVGLFSSYFLNPSCALTLWGCPRQTMKLYTKILYTQSSVDTAQNTCFCVSIVSLHFRSDRQDHKHSTGEERKKGDTDTKQKAVSPQERAMSSLKKRYSNSSAERDVEDKEVTEKMLSPVGGENGNSSPDKVPGEEKVVLERTITLVNGVAIIVGTIIGSGIFVTPTGVVKEAGSVGLSLVVWAVCGVFSTIGALCYAELGTTISKSGGDYAYILEVYGSLPAFLKLWIELLIIRPSSQYIVAYVFATYLLKPIFPDCPVPENGAKLIACLCILLLTAINCYSVKAATRVQDAFAAAKLFALGLIIIIGFVKIGKGDTVNLLPENSFKNSNYDFGNIGLALYSGLFAYGGWNYLNFVTEEMIEPYKNLP…	631	19	0.0301109
dnaJ homolog subfamily A member 2	642128478	411	45 kDa	MANVVDTKLYDILGVSPTATENELKKSYRKLAKEYHPDKNPNAGDKFKEISFAYEVLTNPEKKELYDRYGEQGLREGGGGGGGMDDIFSHIFGGGLFGFMGGQGRSRNGGRRRGEDMVHPLKVSLEDLYNGKTTKLQLSKNVLCGTCNGQGGKTGAVQKCVACRGRGMRIMIRQLAPGMVQQMQSVCTDCNGEGEVINEKDRCKKCEGKKVSKEVKILEVHVDKGMKHGQKITFGGEADQAPGVEPGDIVLVLQEKEHETYKREAHDLHMTHKIGLVEALCGFQFTLKHLDGRQIVVKYAAGKVIEPGSVRVVRGEGMPQYRNPFEKGDLYIKFDVQFPDNNWISPDKLNELEDLLPTRAEAPIVSGDAEEVDLQDYDVSQGSSGGRREAYNDSSDDEG…	411	10	0.0243309
radixin isoform X2	642129336	386	45 kDa	MSTSDGRWGLYWGYRLLHGRIGSLANPRWTIFLFGGQVXXXXXXXHDNDPNDTAGQRRSGFVRSISRFIVLNQLKMYLVFETSVLIFVLTVVKIEDSMMEYLKIAQDLEMYGVNYFSIKNKKGSELWLGVDALGLNIYEQNDKMTPKIGFPWSEIRNISFNDKKFVIKPIDKKAPDFVFYAPRLRINKRILALCMGNHELYMRRRKPDTIEVQQMKAQAREEKNHKKMERALLENEKKKRELAEKEKEKIEKEKEELMERLKQIEEQTKKAQQELEEQTRRALELEQERKRAQEEAERLEKERRMAEEAKTALLQQSENQMKNQEHLATELAELTSKISLLEDAKQKKEDEATQWQQKVWSQLLLSSFTLTSPTFSNGLVPCVIKL	386	2	0.00518135
plastin-3	642129360	623	70 kDa	MAGKISKDELEELREAFGKIDLDGNGSICDYELHELFKEANLPLPGYKVREIIQKLDRNKDNKISFDEFLSIFQELKSSDIAKSFRKAINRKEGILAIGGTSTQSSEGTQHSFSEEERYAFVNWLNTALENDPDCKHALPMDPNSDSLFKAMGDGIVLCKMINLSVPDTIDERTINKKKLTPFTIQENLNLALNSASAIGCHVVNIGALDLREGKPHLVLGLLWQIIKIGLFADIELSRNEALAALLRDGETLEDLMKLSPEELLLRWANFHLENAGWQKINNFSSDIKDSRAYFHLLNQISPKGTEEDQPRIDISMAGFSEKDDLKRAENMLQQADRLGCRQFVTPADVVAGNPKLNLAFVANLFNKYPSLTKPEGEDIDWGMLEGETREERTFRNWM…	623	7	0.011236
major facilitator superfamily domain-containing protein 1	642129486	482	53 kDa	MAQPAEKAYYRFLVLFFNCLLTFGSYFCFDIPSVLQDQFQGNLTCANTTVINGTVDCVEGLGMTPQEYNLLYAIYAWTNAVVVIMAGFLIDKLGNRFGVFLFSFLCVLGSAIFALGSHFKGTAYLLPLMLTGRLLFGSGNGSLTIVQNRITAFWFRGKELALAFGLTLAFSRLGSVLNFFLTQRFQAQYGMQWTLWGGAFLCVLGFMSAITVSALDKVGMKQLGLDGAIQEESRKVRFQDVKLLSLRYWLLVLTIMFFYNGIFPFIADASKFIQDKYSDYSQKEAAYIAGAVYDSSLVLSATVGILIDNVGLRGVFAVSCAVLTLPVFGLLAFTFVPPLVSTIWLGVTYSFAAASMWPSIPLVVPQATLGTAMGLATSVQMVGIGISNLVVGQILGTKS…	482	8	0.0165975
hypoxia up-regulated protein 1 precursor	642129922	1032	116 kDa	MLLYLDCTWTSWHLEFGTVMSKEPYEVTMRRKMLWALFCLVLALLPSQTASVAVMSVDLGSEWMKVAIVKPGVPMEIALNKESRRKTPIAVCLKENERLFGDGALGVSVKNPKFVYRYLQSLLGKKHDNPQVAFYQKRFSEHQLVKDASRGTVVFRNSEVMQYSPEELLGMVLNYSRGLAQDFAEQPIKDAVITVPAFFNQAERRAVLQAAQMAGVKVLQLINDNTAVALNYGVFRRKDINSTAQNMMFYDMGSGSTTATIVTYQTVKTKDSGTQPQLQIRGVGFDRSLGGFEMDLRLRDHLAKLFNEQKKTKKDVRENHRAMAKLLKEAQRLKTVLSANAEFMAQVEGLLDEIDFKAKVTRVEFEALCADLFERVPGPVQEALSSAEMSLDEIEQVIL…	1032	7	0.00678295
vitamin K epoxide reductase complex subunit 1-like protein 1	642130015	169	19 kDa	MASNSCSGVPKWEGKTRLFLCIFGLFLSFYALHVEISRERDPEYRAMCDLGDSVSCSKVFTSRWGRGFGLVQFFFAKDSVLNQPNSLLGIIFYTLQLALGQSVSSRAAFLLVLASWVSMAGSLYLAGVLAFILGDFCVVCVSTYVVNFLLLFTNLKRRTGLEAVKTKTG	169	6	0.035503
collagen alpha-3(VI) chain isoform X4	642131366	3999	436 kDa	MLGFVQRVVENVNVGENKDRVSVVQYSRNPEAHFLLNTYPEKQSVLSSIRSLKHKGGRPLNTGAALQYVKDNIFTSSSGSRGQEGVPQILILLSGGRSQDDVGGAAVALKQNRIVPFCIGTRNADILELQIIARFPSYALSVPWFDDLESIEQQLLSLVKRVPRQPKVYQRTVVDKTESKQRDVVFLLDGSDETLNGFEAMRDFVQRLVEKLTVEENKDRVSVVQYSREPEAQFYLNTYTTKEDIVDTVRGLRHKGGRPLNTGAALQYVRDNVFIASSGSRRQEGIPQILVLLSGGRSNDDVRNAVTNLKEIGVMAIVVGMRNADILELQTISYEPSYAFSATHYNDLPNIQQQVVSAVERVEMTATNLPTTLIDTSNDTRRDIVFLLDGSDDSRRRFT…	3999	28	0.00700175
calcium-binding mitochondrial carrier protein Aralar1	642131442	718	80 kDa	MLLLAWLIFNFLCYCFXXXXXLSLHYQIHQGLALMTPTVETTARGDSNALRNIFLKYASVVENGVRYMSPRDFVQNFLGLHNQPDHNRKTVQLIAGVADTSKDGLISFQEFLAFESILCVPDALFIVAFQLFDKTGTGDISFANVRDIFSQTTVHHHIPFNWDCEFIRLHFGSDRKKNLSYLEFTQFLQELQLEHARQAFAQKDKSKSGTISAMDFSDIMATIRHHMLTPFVEENLVSAAGGSTSHMVSFSYFNAFNALLNNMELIRKVYSTLAGPYKDTLVTKEEFVSAANKFGQINPMEIDILYQLSGLYAHSGKLNLADIERIAPLEEGALPYHLAEIQRQQAHGDPHRSVLLQAAESAYRFGLGALAGATGATAVYPIDLVKTRMQNQRSTSSFV…	718	8	0.0111421
regulator of microtubule dynamics protein 3	642132013	497	56 kDa	MKPLGRNWMIGLGVGATAGVGLITFIIYKEISRKRSQTLLLHTNPPEYLIDSPDGTPLQIESLEQEVVAQQQALEAVVQGLSPEQVELRNQLDEVLTCVSSLRFEVAELRTGLQDIAQQIIQDVKKGVEDSQRARRRRHIISHRERTDSMSSSSIYFSASQGVYGGETSEGGYSTANAESDYTDRDTDRETDKEAEREPEEDSDEDKSCATTITLRQEDSQEEGEEPQEEDEDNEDDDEEEMLEVMAEVPSGELALLLAQSDILHTGDARLKAEGFHLLLANKLQYGDSREFLWRLARAYSDMYDSTEDKQEKKSYAEQGREEAEFALKKNGLNAECHKWFAVLTGLTSQYETMHSKLKSSHILKEHLDRAIALRDDDPLCFYLLGRWCYEVSTLGWLE…	497	6	0.0120724
malectin precursor	642132577	287	32 kDa	MRWVKVPLVPGLVMAVLSLLAEHCWADGGGPNLAERVIWAVNAGGEAHTDMHGIHFKKDPLEGKLGKASDYGVRLPILRSSPEDQVLYQTERYNEDTFGYEVPIREEGDYILVMKYAEVYFAQSQQKVFDVRLNDHVVVKDLDIFERVGHSTAHDEIVPFSIRRGKLSVQGEVSTFNGKLTVEFVKGYYDNPKVCALYVMKGTLDDVPKLQPHPGLEKREELEEEEEEETEVGEEGGKKSTSTAPKYKVQSGPRTPNPYAADNSSLMFPILVAFGVFIPTLFCLCRL	287	4	0.0139373

## Sheet: Cystein abundance analysis
Proteins in Extraction Sample_Control		Proteins in Extraction Sample_AgNP
0.0172414		0.00869565
0.015873		0.0201005			F-Test Two-Sample for Variances					t-Test: Two-Sample Assuming Unequal Variances
0.00796813		0.0253623
0.0201465		0.0201005				Control	AgNP				Control	AgNP
0.0120329		0.0114943			Mean	0.018246	0.0165644			Mean	0.018246	0.0165644
0.0216049		0.0124224			Variance	0.000183415	0.000138922			Variance	0.000183415	0.000138922
0.0105263		0.0128676			Observations	154	236			Observations	154	236
0.0294118		0.012987			df	153	235			Hypothesized Mean Difference	0
0.00483092		0.0122449			F	1.32027				df	295
0.013245		0.0077821			P(F<=f) one-tail	0.027764				t Stat	1.26056
0		0.0170455			F Critical one-tail	1.26959				P(T<=t) one-tail	0.104233
0.00408163		0.00828729								t Critical one-tail	1.65004
0.024		0.0130548								P(T<=t) two-tail	0.208465
0.00694444		0.0251572								t Critical two-tail	1.96804
0.0444444		0.0216049
0		0.00483092
0.0136986		0
0.00884956		0.0283688
0.0198675		0.0224719
0.0497925		0.0199005
0.0172414		0.0265487
0.0314136		0.037037
0.00884956		0
0.0175219		0.00847458
0.00767263		0.0185185
0.0379747		0.00757576
0.019802		0.0194175
0.0412371		0.0154639
0.00743494		0.037037
0.0181818		0.1
0.015528		0.013986
0.01566		0.00763359
0.057377		0.00323625
0.0396825		0
0.0330579		0.0141988
0.0598291		0.0490196
0		0.00377358
0.0253012		0.0139535
0.0122117		0.0224215
0.0217391		0.015625
0.0165877		0.0157895
0.0253807		0.00174216
0		0.0178571
0.0434783		0.0143885
0.0189437		0.00446429
0.0186567		0.0421053
0.0441989		0.0238095
0.0135135		0.0192308
0.00980392		0.02746
0.00794552		0.0263158
0.0266413		0.010101
0.0210084		0.0132159
0.0172414		0.00694444
0.0295359		0.019802
0.00460829		0.0196078
0.0204082		0.0138408
0.0204461		0.03125
0.0031679		0.0314961
0.00970874		0.019084
0.0316456		0
0.0074813		0
0.00680272		0.0102459
0.0130011		0.0167598
0.00784314		0.00285714
0.0300501		0.041502
0.00981354		0.034188
0		0.0148368
0.0348101		0.0114123
0.0153061		0.0103093
0.0113314		0.0210084
0.0177305		0.0199005
0.0243902		0.0234192
0.0177515		0.0276923
0.010453		0.0295359
0.00512821		0.0170068
0.0156556		0.00235294
0.014245		0.0109612
0.00598802		0.0153846
0.00666667		0.0324111
0.0215208		0.0138067
0.0225564		0.0148359
0.0157687		0.0182648
0.00492611		0.0243902
0.00282486		0.0129032
0.021978		0.0648464
0.010327		0.021978
0.0106282		0.00197239
0.00851064		0.0109756
0.0106525		0.0044843
0.0238806		0.0194175
0		0.032967
0		0.017301
0.0289855		0.00555556
0.0365854		0.0277778
0.0313152		0
0.0176332		0.01222
0.0199203		0.00996678
0.0234114		0.0220588
0.0725		0.0208333
0.0195122		0.00883392
0.00884956		0.0138462
0.0195695		0.00246914
0.0216346		0.00724638
0.0225166		0.00921659
0.0186335		0.00711744
0.0284775		0.0136364
0.0122449		0.0253566
0.0203804		0.0117302
0.00808625		0.0102564
0		0.0126904
0.0104895		0.00990099
0.0227273		0.0186916
0.0123609		0.016624
0.0192719		0.0224632
0.0290135		0.0154799
0.00280505		0.0171149
0.0203562		0.0183486
0.00809444		0.0107335
0.0440529		0.0145833
0.00839454		0.0115607
0.00381679		0.0150376
0.012016		0.0142045
0.00645161		0.0145631
0.0185874		0.0166667
0.0123153		0.0132159
0.0168599		0.0106667
0.0185005		0.0310881
0.0267857		0
0.0125		0.00853242
0.0123874		0.0232558
0.0282686		0.0117188
0.0149726		0.0052356
0.0165485		0.010101
0.0188406		0.0627063
0.0107281		0.00573263
0.0119048		0.0147874
0.0140237		0
0.019802		0.0151324
0.0181378		0.0207254
0.0150628		0.0246914
0.012963		0.0175439
0.0210526		0.0152672
0.0329218		0.0135338
0.0125428		0.0179104
0.0162338		0.00734394
0.0885417		0.0281124
0.0198265		0.0470588
0.0200803		0.0153061
0.00925926		0.0376569
0.0436137		0.0143678
0.00724638		0.0199005
0.00943396		0.004
0.00380228		0.0226469
0.0128205		0.00882585
		0.01002
		0.0201149
		0.0195695
		0.0214286
		0.00972447
		0.015625
		0.00377358
		0.0294118
		0.0453461
		0.0212766
		0.0210526
		0.0179949
		0.0136719
		0.0217391
		0.00645161
		0.0261438
		0.0144928
		0.0203562
		0.0149254
		0.0207444
		0.0104822
		0.0103359
		0.0140515
		0.0222222
		0.0111111
		0.0104895
		0.00840336
		0.00148368
		0.015544
		0.0056444
		0.0241546
		0.015361
		0.0185185
		0.0075188
		0.00262467
		0.016624
		0.00809444
		0.0596616
		0.0161663
		0.00898204
		0.0151515
		0.0254237
		0.0133333
		0.00900901
		0.00970874
		0.0143885
		0.0158014
		0.00540723
		0.0119048
		0.0237691
		0.0162866
		0.0149726
		0.0217114
		0.00988142
		0.0185676
		0.0161483
		0.0128302
		0.0144144
		0.0127841
		0.017101
		0.031348
		0.0135501
		0.0103359
		0.0021322
		0.0136612
		0.0192308
		0.0134228
		0.0142566
		0
		0.00797872
		0.00847458
		0.0301109
		0.0243309
		0.00518135
		0.011236
		0.0165975
		0.00678295
		0.035503
		0.00700175
		0.0111421
		0.0120724
		0.0139373
